# Supplementary material for: Estimation of total cardiovascular risk using the 2019 WHO CVD prediction charts and comparison of population-level costs based on alternative drug therapy guidelines: a population-based study of adults in Bangladesh
Source: PubMed Central journal article supplement (PMC7371224; doi:10.1136/bmjopen-2019-035842), 2020-07-19
Supplement: bmjopen-2019-035842.draft_revisions.pdf [file bmjopen-2019-035842.draft_revisions.pdf]

# BMJ Open

BMJ Open is committed to open peer review. As part of this commitment we make the peer review history of every article we publish publicly available.

When an article is published we post the peer reviewers' comments and the authors' responses online. We also post the versions of the paper that were used during peer review. These are the versions that the peer review comments apply to.

The versions of the paper that follow are the versions that were submitted during the peer review process. They are not the versions of record or the final published versions. They should not be cited or distributed as the published version of this manuscript.

BMJ Open is an open access journal and the full, final, typeset and author-corrected version of record of the manuscript is available on our site with no access controls, subscription charges or pay-per-view fees (<http://bmjopen.bmj.com>).

If you have any questions on BMJ Open's open peer review process please email [info.bmjopen@bmj.com](mailto:info.bmjopen@bmj.com)

# BMJ Open

## Estimation of total cardiovascular risk using the WHO/ISH CVD prediction charts and comparison of population-level costs based on alternative drug therapy guidelines in Bangladesh

|                               |                                                                                                                                                                                                                                                                                                                                                                                                                                                               |
|-------------------------------|---------------------------------------------------------------------------------------------------------------------------------------------------------------------------------------------------------------------------------------------------------------------------------------------------------------------------------------------------------------------------------------------------------------------------------------------------------------|
| Journal:                      | <i>BMJ Open</i>                                                                                                                                                                                                                                                                                                                                                                                                                                               |
| Manuscript ID                 | bmjopen-2019-035842                                                                                                                                                                                                                                                                                                                                                                                                                                           |
| Article Type:                 | Original research                                                                                                                                                                                                                                                                                                                                                                                                                                             |
| Date Submitted by the Author: | 18-Nov-2019                                                                                                                                                                                                                                                                                                                                                                                                                                                   |
| Complete List of Authors:     | Islam, Jessica; World Health Organization Country Office for Bangladesh, ; University of North Carolina at Chapel Hill Gillings School of Global Public Health, Department of Epidemiology<br>Zaman, MM; World Health Organization, Dhaka, Bangladesh, Moniruzzaman, Mohammad; Shiga University of Medical Science, Public Health<br>Ara Shakoor, Shawkat; National Institute of Ophthalmology<br>Hossain, A.H.M. Enayet; National Institute of Ophthalmology |
| Keywords:                     | Cardiac Epidemiology < CARDIOLOGY, EPIDEMIOLOGY, Hypertension < CARDIOLOGY, Ischaemic heart disease < CARDIOLOGY, Myocardial infarction < CARDIOLOGY                                                                                                                                                                                                                                                                                                          |
|                               |                                                                                                                                                                                                                                                                                                                                                                                                                                                               |

SCHOLARONE™  
Manuscripts

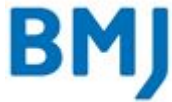

I, the Submitting Author has the right to grant and does grant on behalf of all authors of the Work (as defined in the below author licence), an exclusive licence and/or a non-exclusive licence for contributions from authors who are: i) UK Crown employees; ii) where BMJ has agreed a CC-BY licence shall apply, and/or iii) in accordance with the terms applicable for US Federal Government officers or employees acting as part of their official duties; on a worldwide, perpetual, irrevocable, royalty-free basis to BMJ Publishing Group Ltd ("BMJ") its licensees and where the relevant Journal is co-owned by BMJ to the co-owners of the Journal, to publish the Work in this journal and any other BMJ products and to exploit all rights, as set out in our [licence](#).

The Submitting Author accepts and understands that any supply made under these terms is made by BMJ to the Submitting Author unless you are acting as an employee on behalf of your employer or a postgraduate student of an affiliated institution which is paying any applicable article publishing charge ("APC") for Open Access articles. Where the Submitting Author wishes to make the Work available on an Open Access basis (and intends to pay the relevant APC), the terms of reuse of such Open Access shall be governed by a Creative Commons licence – details of these licences and which [Creative Commons](#) licence will apply to this Work are set out in our licence referred to above.

Other than as permitted in any relevant BMJ Author's Self Archiving Policies, I confirm this Work has not been accepted for publication elsewhere, is not being considered for publication elsewhere and does not duplicate material already published. I confirm all authors consent to publication of this Work and authorise the granting of this licence.

1  
2  
3 1 **Estimation of total cardiovascular risk using the WHO/ISH CVD prediction charts and**  
4 2 **comparison of population-level costs based on alternative drug therapy guidelines in**  
5 3 **Bangladesh**  
6  
7 4  
8

9 5 Running title: Total cardiovascular risk approach in Bangladesh

10 6 Authors: Jessica Yasmine Islam<sup>1,2</sup>, M Mostafa Zaman<sup>2,3</sup>, Mohammad Moniruzzaman<sup>2,3</sup>, Shawkat  
11 7 Ara Shakoor<sup>5</sup>, A.H.M. Enayet Hossain<sup>5</sup>  
12  
13

14 8  
15 9 **Author Affiliations:**

16 10 <sup>1</sup>Department of Epidemiology, Gillings School of Global Public Health, University of North  
17 11 Carolina at Chapel Hill, North Carolina, USA

18 12 <sup>2</sup>Noncommunicable Disease Unit, World Health Organization, Country Office for Bangladesh,  
19 13 Dhaka, Bangladesh

20 14 <sup>3</sup>Shiga University of Medical Science, Public Health, Seta-tsukinowa-cho, Otsu, Shiga. 520-  
21 15 2192, Japan, Otsu, JP 520-2192

22 16 <sup>3</sup>Research and Publication Unit, World Health Organization Country Office for Bangladesh,  
23 17 Dhaka, Bangladesh

24 18 <sup>5</sup>National Institute of Ophthalmology. Sher-e-Bangla Nagar, Dhaka, Bangladesh  
25  
26  
27  
28  
29  
30  
31  
32  
33  
34  
35

36 21 **Corresponding Author:**

37 22 Jessica Yasmine Islam, PhD, MPH  
38 23 The University of North Carolina at Chapel Hill  
39 24 Gillings School of Global Public Health  
40 25 Department of Epidemiology  
41 26 Chapel Hill, NC, USA 27599-7400  
42 27 Email: islamjy@email.unc.edu  
43 28  
44 29

45 30 **Manuscript word count: 3869**  
46 31  
47 32  
48 33  
49 34  
50 35  
51 36  
52 37  
53 38  
54 39  
55 40  
56  
57  
58  
59  
60

**Abstract**

Objective: The objective this study is to apply estimate the population distribution of 10-year cardiovascular disease (CVD) risk among Bangladeshi adults aged 40 years and above, using the WHO recommended WHO/ISH CVD prediction charts. Additionally, we compared the cost of pharmacologic treatment based on CVD risk (cardiovascular risk threshold  $\geq 30\%$ /  $\geq 20\%$ ) to single risk factor (hypertension) cutoff levels for pharmacologic intervention in Bangladesh.

Study Design: Cross-sectional, population-based study

Setting and Participants: In 2013, we collected data from a nationally representative cross-sectional study of adults aged  $\geq 40$  years from urban and rural areas of Bangladesh ( $n = 6189$ ). Using the World Health Organization / International Society of Hypertension (WHO/ISH) risk prediction charts, CVD risk was calculated and categorized as low( $<10\%$ ), moderate( $10\text{-}<20\%$ ), high( $20\text{-}<30\%$ ), and very high risk( $\geq 30\%$ ). We estimated drug therapy costs using the lowest price of each drug class available(aspirin, thiazide diuretics, statins, and angiotensin-converting enzyme inhibitors). We compared the total cost of drug therapy using the total risk vs. single risk factor approach.

Primary Outcome Measures: Our primary outcome was 10-year CVD risk categorized as low( $<10\%$ ), moderate( $10\text{-}<20\%$ ), high( $20\text{-}<30\%$ ), and very high risk( $\geq 30\%$ ).

Results: The majority of adults (85.2%, 95% CI: 84.3–86.1) have a 10-year risk of CVD of less than 10%. The proportion of adults with a 10-year CVD risk of  $\geq 20\%$  and  $\geq 30\%$  was 1.8% and 0.6%, respectively. Using the total risk approach would reduce drug costs per million population

1  
2  
3 66 to \$635,976 (risk of  $\geq 20\%$ ) or \$173,448 ( $\geq 30\%$ ) for CVD treatment and prevention in  
4  
5 67 comparison to using the single risk factor approach (\$5,665,968).  
6  
7 68

9 69 Conclusion: To reduce health care expenditure for the prevention and treatment of CVD in  
10  
11 70 Bangladesh, a total risk approach using the WHO/ISH risk prediction chart may lead to cost-  
12  
13 71 savings and potentially improved treatment coverage.  
14  
15 72

16 73 **Keywords:** non-communicable diseases, Bangladesh, cardiovascular disease, pharmacologic  
17  
18 74 intervention, cost, chronic disease  
19  
20 75  
21 76  
22 77  
23 78  
24 79  
25 80  
26 81  
27 82  
28 83  
29 84  
30 85  
31 86  
32 87  
33 88  
34 89  
35 90  
36 91

1  
2  
3 92 **Article Summary**  
4

5 93 **Strengths and Limitations of the Study**  
6  
7

- 8 94 • This study utilized a multistage, geographically clustered, probability-based sampling  
9  
10 95 approach to produce nationally representative data for Bangladesh of adults aged 40  
11  
12 96 years and above.  
13
- 14 97 • Currently, Bangladesh has not incorporated clinical guidelines for screening or treatment  
15  
16 98 of risk factors based on absolute CVD risk scores, or estimation of the population  
17  
18 99 distribution of CVD risk over time. This study provides evidence for incorporating the  
19  
20 100 WHO/ISH CVD Risk Prediction Charts and potential cost-savings of strategy  
21  
22 101 implementation.  
23
- 24 102 • The WHO/ISH CVD Risk Prediction Charts should be applied to a population who have  
25  
26 103 not experienced a CVD event in the past. We were unable to confirm the medical history  
27  
28 104 of participants using medical charts or health records and relied on self-report, leading to  
29  
30 105 the potential for measurement error and recall bias.  
31  
32
- 33 106 • Our cost estimates were based on the prevalence of each risk approach in our study  
34  
35 107 sample. Although we present the total number of people estimated to require drug  
36  
37 108 treatment using 2016 census data, we were unable to identify population estimates of  
38  
39 109 only those at risk of their first CVD event due to lack of surveillance data.  
40  
41  
42  
43 110  
44  
45 111  
46  
47  
48 112  
49  
50  
51 113  
52  
53  
54 114  
55  
56  
57  
58  
59  
60

## 115 **Background**

116 Globally, cardiovascular disease (CVD) is the leading cause of death and  
117 disproportionately impacts low- and middle-income countries (LMICs), where over 75% of CVD-  
118 related deaths occur<sup>1</sup>. People living in LMICs are at high risk of developing CVD due to the  
119 absence of integrated primary care for early detection and prevention of CVD-related risk  
120 factors. Limited access to primary care and the growing burden of CVDs is a significant cause of  
121 poverty in LMICs and hinders the macroeconomic development of many countries<sup>2</sup>. LMICs are  
122 estimated to experience cumulative economic losses exceeding 7 trillion US dollars over the  
123 next 15 years due to morbidity and mortality caused by noncommunicable diseases, including  
124 CVD<sup>3</sup>. As such, the significance of the CVD epidemic has gained increasing international  
125 recognition over the past decade, leading to the development of several international guidelines  
126 for CVD control and prevention<sup>4</sup>.

127 In 2007, the World Health Organization (WHO) published pocket guidelines, including  
128 CVD risk prediction charts, designed for health care workers in LMICs to guide patient 10-year  
129 risk stratification for heart attack or stroke. There are two possible strategies suitable for a low  
130 resource setting to assess the risk of a cardiovascular event and identify those at high risk of a  
131 fatal CVD outcome: 1. Utilize a single risk factor management strategy, which focuses on one  
132 condition at a time, such as hypertension; 2. Utilize a more holistic approach considering  
133 several risk factors such as age, tobacco use, gender, diabetes diagnosis, blood pressure, and  
134 blood cholesterol when measured. Through the total risk approach, pocket guidelines help to  
135 identify high-risk patients that are in imminent danger of a heart attack or stroke for timely  
136 pharmacologic treatment or surgical interventions. Currently, individuals in LMIC's, including  
137 Bangladesh, are often offered pharmacologic interventions based on the presence of single  
138 CVD risk factors, such as high blood pressure. However, the single risk factor approach can  
139 result in overtreatment or neglecting to treat those with an overall higher CVD-risk based on  
140 CVD risk factors. Applying the total risk approach via the WHO/ISH prediction charts in a



1  
2  
3 141 nationally representative sample may provide an opportunity to estimate population-level  
4  
5 142 distribution of CVD risk and inform CVD treatment policy recommendations <sup>5 6</sup>.

7 143 Currently, Bangladesh has not incorporated clinical guidelines for screening or treatment  
8  
9 144 of risk factors based on absolute CVD risk scores, or estimation of the population distribution of  
10  
11 145 CVD risk over time. Data are needed to support the implementation of the WHO/ISH prediction  
12  
13 146 charts among the Bangladeshi population and demonstrate the benefit of the WHO  
14  
15 147 recommendation on CVD prevention. Prior studies conducted in Bangladesh have estimated  
16  
17 148 CVD risk among adults residing in rural areas only and have not included a nationally  
18  
19 149 representative population <sup>7-9</sup>. Additionally, no prior studies have estimated the potential costs of  
20  
21 150 pharmacological treatment for CVD in Bangladesh using either the single risk factor or total risk  
22  
23 151 approach. As such, our objective was to assess the distribution of absolute CVD risk among a  
24  
25 152 nationally representative sample of Bangladeshi adults using the WHO/ISH risk prediction chart  
26  
27 153 recommended for the WHO South and South-East Asian Region (SEARO). We also compared  
28  
29 154 the costs of drug treatments for CVD prevention using the total cardiovascular risk thresholds  
30  
31 155 ( $\geq 20\%$  and  $\geq 30\%$ ) and with single risk factor cutoff levels (blood pressure  $\geq 140/90$  mm Hg).  
32  
33  
34  
35  
36

## 37 157 **Methods**

### 38 39 158 Study design and setting

40  
41 159 Data for the current study were analyzed from a population-based cross-sectional study  
42  
43 160 conducted from September to December 2013 to assess the burden of blindness and low vision  
44  
45 161 among adults (men and women) aged 40 years and above in Bangladesh. The target population  
46  
47 162 of this survey included men and women residing in Bangladesh over the age of 40 years. The  
48  
49 163 exclusion criteria included tourists and the institutionalized, such as residents of a military base,  
50  
51 164 hospital, prisons, nursing homes, and other such institutions. We obtained ethical approval for  
52  
53 165 this study from the Institutional Review Board of the National Institute of Ophthalmology. We  
54  
55 166 provided participants with detailed study information using a printed handout prepared in  
56  
57  
58  
59  
60

1  
2  
3 167 Bengali to inform them of the objective of the study. Written consent was obtained from  
4  
5 168 participants through signature or, if not possible, through thumbprint.  
6

### 7 169 Sampling Frame

9 170 We adopted a multistage, geographically clustered, probability-based sampling  
10  
11 171 approach to obtain a nationally representative sample of Bangladesh, as previously described  
12  
13 172 <sup>10-12</sup>. Population statistics were obtained using the 2011 national census conducted by the  
14  
15 173 Bangladesh Bureau of Statistics (BBS) to create the sample frame <sup>13</sup>. The sampling frame  
16  
17 174 included 64,407 primary sampling units (PSUs) covering all seven divisions of the country. We  
18  
19 175 randomly selected seventy-two PSUs (25 urban and 47 rural) from seven divisions, with the  
20  
21 176 probability of selection proportional to the population size of each division. In each PSU, we  
22  
23 177 selected 100 consecutive households as the secondary sampling unit.  
24  
25

26 178 For each household, a trained field data collector approached the head of the household  
27  
28 179 or the family member most knowledgeable of the residents to screen for eligible participants.  
29  
30 180 The respondent for screening was asked to describe the composition of household residents  
31  
32 181 who considered the home to be their primary place of residence as of the night before. A list  
33  
34 182 was composed and ordered from youngest to oldest age in years starting from 40 years. Using  
35  
36 183 the list of eligible residents, we used the Kish table approach to randomly select one respondent  
37  
38 184 from each home. The respondent was asked to come to a nearby health center the next day to  
39  
40 185 administer the survey by trained study interviewers and undergo the relevant medical  
41  
42 186 examination by the study physician. Based on the medical review, participants were followed-up  
43  
44 187 with by the providers at the health center for treatment, when appropriate.  
45  
46

47 188

### 49 189 Patient and public involvement

51 190 There was no patient or public involvement in the implementation of this study or interpretation  
52  
53 191 of analytic results.  
54

55 192

### 193 Data Collection

194 To ensure effective and uniform data collection, field interviewers underwent a 7-day  
195 training on the interview process and methodology by the study ophthalmologists and  
196 epidemiologists. The training included an in-depth review of the survey content and protocol for  
197 completing the demographic information interview schedule questionnaire (a modified  
198 WHO/PBL Version III). We provided a detailed survey protocol manual outlining the survey  
199 activities, the questionnaire interview, and information about the duties and responsibilities of all  
200 survey personnel to each member of the data collection team.

201 Demographic data were obtained, including age, sex, marital status, educational level,  
202 and occupation, using a structured questionnaire survey. Data regarding tobacco use, health  
203 history, and treatment history were also collected. Participants were asked if they smoked (e.g.  
204 cigarette, hookah, pipe) or if they used smokeless tobacco (e.g. chewing tobacco, jorda, white  
205 lead) to assess history of tobacco use. Medical history for a prior diagnosis of high blood  
206 pressure or hypertension, diabetes, renal disease, or any cardiovascular diseases by a health  
207 care provider was obtained from each participant. Medication history was obtained based on  
208 self-report, including medication for high blood pressure, diabetes, malaria, steroids,  
209 tuberculosis, and among women, history of oral contraception. The questionnaire was translated  
210 from English to Bengali, adapted, and validated before data collection.

211 Physical measurements, including height, weight, and blood pressure were collected. BP  
212 was measured by an appropriately calibrated aneroid sphygmomanometer by a trained field  
213 interviewer using appropriately sized arm cuffs. BP measurements were consistently taken on  
214 the right arm at the level of the heart and elbow-assisted while the participant was seated. The  
215 initial measurement was performed after five minutes of rest on the right arm. After two minutes,  
216 the second measurement was taken. The mean of these two BP readings was utilized as the  
217 final BP for each participation. To measure blood glucose levels, we obtained random blood  
218 glucose samples<sup>14</sup>. Capillary blood samples were consistently taken using the right arm and

1  
2  
3 219 index finger with a glucometer, namely Accu-chek Advantage (Roche Diagnostics Division,  
4  
5 220 Grenzacherstrasse, Switzerland).

### 6 7 221 Estimation of 10-year CVD risk

8  
9 222 The WHO/ISH prediction charts were used to grade cardiovascular risk<sup>15</sup>. The charts  
10  
11 223 developed by the WHO/ISH provide the 10-year risk of a fatal or non-fatal major cardiovascular  
12  
13 224 event, such as myocardial infarction or stroke, based on age, sex, blood pressure, smoking  
14  
15 225 status, total blood cholesterol, and the presence or absence of diabetes mellitus for 14 WHO  
16  
17 226 epidemiological sub-regions. Two sets of charts are available: one set is used in settings where  
18  
19 227 blood cholesterol can be measured, and the other set is suitable for when blood cholesterol has  
20  
21 228 not been measured. We utilized the South-East Asian Region (SEAR) WHO/ISH prediction  
22  
23 229 chart where total blood cholesterol cannot be measured to estimate the 10-year risk of a CVD  
24  
25 230 event among Bangladeshi adults,

26  
27  
28 231 The prediction chart grades cardiovascular risk using the following categories: age (1:  
29  
30 232 40–49 years; 2: 50–59 years; 3: 60–69 years; 4: 70 years and older), sex (men and women),  
31  
32 233 smoking (never smoker, current smoker or ex-smoker), systolic blood pressure (<140 mmHg,  
33  
34 234 140 to <160, 160 - <180, and  $\geq 180$ ), and the presence or absence of diabetes. The risk  
35  
36 235 categories for 10-year combined acute myocardial infarction and stroke (fatal and non-fatal) are  
37  
38 236 as follows: 10%, 10 - <20%, 20 to <30%, 30 to <40, and  $\geq 40\%$ . For this analysis, we combined  
39  
40 237 the last two categories of risk as  $\geq 30\%$ .

41  
42  
43 238 Observations with missing values were dropped from the analysis. We did not anticipate  
44  
45 239 any bias from the complete-case analysis approach as the number of missing observations for  
46  
47 240 key variables was less than 2%: smoking status, n=18 or 0.3% missing values; systolic blood  
48  
49 241 pressure, n = 22 or 0.4% missing values; diastolic blood pressure, n = 25 or 0.4% missing  
50  
51 242 values; and blood glucose levels, n = 7 or 0.1%;

### 52 53 243 Data Analysis

1  
2  
3 244 We present sociodemographic variables using mean (standard deviation) or the median  
4  
5 245 (interquartile range) for continuous variables and proportion for categorical variables. We  
6  
7 246 conducted bivariate analyses by sex and age group. We used the chi-square test to assess for  
8  
9 247 any significant differences in CVD risk distribution across sex. For estimating the cost of  
10  
11 248 medicines per million per year (population aged 40 years or older), we used the lowest price of  
12  
13 249 each drug class available in the market (generic preparation of aspirin, thiazide diuretics,  
14  
15 250 statins, and angiotensin-converting enzyme inhibitors). Appendix 1 includes further details  
16  
17 251 regarding the specific costs of common drugs used to treat cardiovascular disease in  
18  
19 252 Bangladesh.

20  
21  
22 253 To calculate costs using the single risk factor approach, we included all people with BP  
23  
24 254  $\geq 140/90$ . Similarly, to calculate costs based on the cardiovascular risk approach, we included  
25  
26 255 the following categories: (1) people with high cardiovascular risk ( $\geq 30\%$  and  $\geq 20\%$ ), who are  
27  
28 256 recommended four drugs [6]; and (2) people with BP  $\geq 140/90$ , who are recommended  
29  
30 257 antihypertensive treatment. To calculate the estimated annual total cost of CVD medication  
31  
32 258 treatment per million population (aged 40 years or older), we multiplied the percentage of the  
33  
34 259 population at risk and the price of medicine in Bangladesh. We included an estimate of the total  
35  
36 260 number of people estimated to require drug treatment we multiplied the prevalence of the  
37  
38 261 population requiring medication based on each approach based on our study estimates, by the  
39  
40 262 number of people in the general population in 2016<sup>16</sup> stratified by gender and age group.

263

## 264 **Results**

### 265 Demographic Characteristics

266 The mean age of included participants was 52.9 years (men: 53.5 years, women: 52.5  
267 years) (Table 1). The average level of educational attainment was 3.1 years of education;  
268 women were generally less educated than men (2.1 years vs. 4.3 years, respectively). The  
269 majority (80%) of women were housewives, and among men, the most common occupation was

1  
2  
3 270 an industrial worker or day laborer (51.2%). Overall, over one-third of participants ever used  
4  
5 271 smoking tobacco, and over half ever used smokeless tobacco. Few participants drank alcohol in  
6  
7 272 the past 30 days (1.2%). The mean BMI was 21.9 kg/m<sup>2</sup> and the mean waist circumference was  
8  
9 273 82.4 cm.

#### 11 274 Distribution of Cardiovascular Risk

13  
14 275 We summarized the distribution of cardiovascular risk in the population overall and  
15  
16 276 stratified by sex in Table 2. Over 85% of participants had a low (< 10%) 10-year cardiovascular  
17  
18 277 risk, and this proportion was significantly different across sex (p<0.001). Almost all (97.7%) of  
19  
20 278 the study population were categorized as having cardiovascular risk < 20%. A higher proportion  
21  
22 279 of men (2.2%) were categorized as high risk than women (1.4%) (p = 0.029). Overall, very few  
23  
24 280 participants (< 1%) were categorized as very high risk or with a cardiovascular risk of ≥ 30%.

26 281

#### 28 282 Cost of Drug Treatment

30  
31 283 If a ≥30% threshold of CV risk alone was applied for drug treatment, 0.56% of the total  
32  
33 284 population requires drug treatment (0.75% in urban areas, 0.47% in rural areas). Lowering the  
34  
35 285 cardiovascular risk threshold (from 30% to 20%) alone increased the number of people requiring  
36  
37 286 treatment by almost five times (0.56% [34 of 6090] to 2.3% [140 of 6090]) (Table 3). The  
38  
39 287 consequence was a substantial increase in health care expenditure, as described in Table 4.  
40  
41 288 Conversely, if a single risk factor approach was applied, and all those with hypertension (a  
42  
43 289 persistent SBP ≥140 and/or DBP ≥90) were treated, about 19.6% (1193 of 8,625) of the sample  
44  
45 290 would require drug treatment, specifically antihypertensives; more than 10 times the proportion  
46  
47 291 identified when using the total cardiovascular risk approach alone. Including individuals with  
48  
49 292 raised BP (≥160/100 mm Hg) but with a 10-year CVD risk < 30% or < 20% would increase the  
50  
51 293 percentage of people requiring drug treatment from 0.56 and 2.3, to 4.5% and 3.8%,  
52  
53 294 respectively. This proportion was about three times lower than the proportion of participants  
54  
55 295 using the single risk factor approach (Table 3).

296

### 297 Comparison of Cost by Approach

298           Next, we compared the estimated annual cost of medicines per million population for  
299 implementing the total risk approach vs. the single risk factor approach. Table 4 shows the  
300 estimated number of people aged 40 years or older requiring drug treatment stratified by age  
301 group and gender. The estimate showed that if the single risk factor approach is applied in  
302 Bangladesh with its percentage of population at risk and the lowest price of medicine in the  
303 country, the cost per million population (aged 40 years or older) of treating those with BP  
304  $\geq 140/90$  would be \$5,665,968.0 US\$; if the absolute risk approach were applied, the cost of  
305 treating those with 10-year risk of CVD  $\geq 30\%$  per million population (aged 40 years or older)  
306 would be \$635,976.0, almost nine times less (Figure 1). The cost estimation was based on the  
307 percentage of the population at different levels of risk and the differences in the price of generic  
308 medicines. For this analysis, we focused on the cost of pharmacological treatment as it is the  
309 most critical contributor to the overall direct costs of CVD treatment in Bangladesh. We  
310 assumed that other costs of CVD treatment and prevention service delivery, such as health  
311 facilities and wages of health workers, are similar for both approaches of service delivery<sup>6</sup>.

312

### 313 **Discussion**

314           Using this nationally representative survey of Bangladeshi adults aged 40 years and  
315 above, we found that the majority of adults (97%) were at a low or moderate ten-year risk of  
316 myocardial infarction and stroke. The proportion of adults requiring drug treatment rose from  
317 0.56% to 2.3% when the threshold of CVD risk was changed from  $\geq 30\%$  to  $\geq 20\%$ , respectively;  
318 which was lower the proportion than the single risk factor approach (19.6%). Our data  
319 demonstrated that using a single risk factor approach to manage individual cardiovascular risk  
320 factors is costlier (\$5,665,968 per million population) than using the total risk approach (CVD  
321 risk  $\geq 30$ , \$173,448 per million population; CVD risk  $\geq 20$ , \$635,976 per million population), as a

1  
2  
3 322 more substantial proportion of adults will need drug treatment. Findings from this analysis  
4  
5 323 support the implementation of clinical guidelines using CVD risk scores calculated using the  
6  
7 324 WHO/ISH prediction charts to appropriately identify patients at highest risk of CVD development  
8  
9 325 over ten years in Bangladesh.

11 326 In our study using nationally representative data, we found that the 10-year risk of CVD  
12  
13 327 was low (<10%) among the vast majority of participants (85.2%). Additionally, only 2.4% of  
14  
15 328 adults were at high risk ( $\geq 20\%$ ) of a CVD event within the next ten years. Two prior studies  
16  
17 329 have reported absolute CVD risk among the Bangladeshi population (using the WHO/ISH Tool  
18  
19 330 or any other absolute risk scoring system)<sup>8 17</sup>. In contrast to our study, Fatema et al. found that  
20  
21 331 10% of Bangladeshi adults living in rural areas were at high risk ( $\geq 20\%$ ) of a CVD event within  
22  
23 332 the next ten years, and half of these adults fell in the very high-risk category ( $\geq 30\%$ ). These  
24  
25 333 proportions were the same when total cholesterol was incorporated in the WHO/ISH CVD Risk-  
26  
27 334 Assessment Tool. Unfortunately, we were unable to measure total blood cholesterol and were  
28  
29 335 unable to make similar comparisons. In another rural Bangladeshi population, the proportion of  
30  
31 336 participants at a high-risk ( $\geq 20\%$ ) of a CVD event in 10 years was 2.1%, which is similar in  
32  
33 337 proportion to our finding<sup>17</sup>. Differences in CVD risk may be attributable to environmental,  
34  
35 338 sociodemographic, and lifestyle factors. No other studies have been conducted to assess the  
36  
37 339 10-year risk of CVD using the WHO/ISH tool. Here, we present novel data using a nationally  
38  
39 340 representative sample, which may be generalizable to the population of Bangladesh. Data we  
40  
41 341 present may be used to inform policymakers decisions on clinical guidelines and resource  
42  
43 342 allocation for treatment of CVDs in Bangladesh.

47 343 Our results demonstrate that using a single risk factor approach to manage individual  
48  
49 344 CVD risk factors to prevent heart attacks and strokes would cost more than when using the total  
50  
51 345 risk approach at either the 20% or 30% threshold due to higher drug costs. In Bangladesh,  
52  
53 346 about 60% of out-of-pocket expenditure patients face goes towards drugs directly bought from  
54  
55 347 pharmacies, diagnostics, and informal providers<sup>18</sup>. Additionally, patients in Bangladesh



1  
2  
3 348 experience a high level of uncertainty regarding out-of-pocket costs due to unforeseen costs on  
4  
5 349 diagnostics and medications, including under-the-table payments to providers for reliable and  
6  
7 350 timely services<sup>19</sup>. The cost of treatment for CVD frequently leads to catastrophic health  
8  
9 351 expenditure and impoverishment as a result of use of health services; the proportion of  
10  
11 352 catastrophic spending for treatment is highest among those from the lowest quintiles of wealth  
12  
13 353 (14%) compared to those with high wealth and high socioeconomic status (6.6%)<sup>20</sup>. The  
14  
15 354 economic impact of the sequelae of CVD is particularly severe in Bangladesh where the out-of-  
16  
17 355 pocket expenditures for chronic disease management are high.

18  
19  
20 356 In addition to benefits to the patient, implementing the total risk approach would also be  
21  
22 357 beneficial to the health care system in Bangladesh by improving NCD preventive service  
23  
24 358 delivery and the use of guidelines for adequate care. Currently, Bangladesh is categorized by  
25  
26 359 the World Bank as a lower-middle-income country with emerging health challenges as the  
27  
28 360 burden of NCDs continues to grow. In 2015, an estimated 67% of all deaths in Bangladesh were  
29  
30 361 due to NCDs and the risk of premature death from chronic disease among adults aged 30-70  
31  
32 362 years was 22%<sup>21</sup>. Indeed, CVDs and circulatory diseases are the leading cause of mortality and  
33  
34 363 morbidity in Bangladesh. Despite this substantial burden, preventive services for CVDs in  
35  
36 364 Bangladesh are limited. In 2014, an estimated 16% of health care facilities across the country  
37  
38 365 (i.e. hospitals, community clinics) had the resources to diagnose, prescribe treatment for, and  
39  
40 366 manage patients with CVDs<sup>22</sup>. Among facilities with the capacity to offer services for CVD  
41  
42 367 management, about only 20% utilized established guidelines for hypertension treatment and  
43  
44 368 less than one-third had essential CVD medicines readily available on-site for patients<sup>22</sup>. By  
45  
46 369 integrating the WHO/ISH prediction charts into the national guidelines for management of  
47  
48 370 hypertension and CVD prevention in Bangladesh, the proportion of facilities using established  
49  
50 371 guidelines may increase as the charts are easy to implement, interpret, and access.  
51  
52 372 Additionally, since only one-third of facilities have essential CVD medicines readily available,  
53  
54  
55  
56  
57  
58  
59  
60

1  
2  
3 373 distributing pharmacologic treatment to those at highest risk of premature mortality due to CVD  
4  
5 374 will be crucial.

6  
7 375 The World Health Organization has outlined global targets in the Global Monitoring  
8  
9 376 Framework for the control of NCDs in LMICs, which prioritizes an 80% of availability of  
10  
11 377 affordable basic technologies and essential medicines necessary to treat significant NCDs,  
12  
13 378 including CVDs in both rural and urban areas of the country. Additionally, the Framework  
14  
15 379 recommends LMICs should target that at least 50% of eligible adults with a 10-year CVD risk of  
16  
17 380  $\geq 30\%$  receive drug therapy counseling to prevent heart attacks and strokes<sup>4</sup>. As such, limited  
18  
19 381 CVD treatment options and weak health care infrastructure to access preventive services in  
20  
21 382 Bangladesh is a significant public health concern. As public financing for health care is limited in  
22  
23 383 Bangladesh (~1% of gross domestic product or GDP), cost-effective public health policies from  
24  
25 384 national bodies on CVD drug treatment guidelines based on cost estimates and out of pocket  
26  
27 385 costs to the population of Bangladesh is necessary for effective CVD control. Effective policies  
28  
29 386 should address the potential for overtreatment, which comes at a high cost to both the health  
30  
31 387 care system and the patient. The high percentage of the Bangladeshi adult population at low 10-  
32  
33 388 year CVD risk (<10%) highlights the potential for reduction of CVD risk through population-wide  
34  
35 389 public health policy and availability of accessible preventive services.

36  
37  
38  
39 390 Limitations of this analytic approach should be considered when interpreting our results.  
40  
41 391 CVD 10-year risk was developed using data compiled from each of the 14 WHO epidemiological  
42  
43 392 sub-regions rather than individual countries. As such, the estimation used from each region's  
44  
45 393 chart will most likely apply to the largest country within each region, or from the country where  
46  
47 394 most of the data originated. However, over the past decade, the accuracy and predictive value  
48  
49 395 for the current risk prediction charts have been evaluated and improved as more  
50  
51 396 epidemiological data became available from individual countries<sup>6 15</sup>. Additionally, the charts  
52  
53 397 provide approximate estimates of CVD risk in people who do not have established coronary  
54  
55 398 heart disease, stroke or other atherosclerotic diseases. We were unable to confirm the medical

1  
2  
3 399 history of participants using medical charts or health records and relied on self-report, leading to  
4  
5 400 the potential for measurement error and recall bias.

6  
7 401 Additionally, we were unable to measure total cholesterol. Future research studies  
8  
9 402 should include the measurement of total cholesterol using blood samples. Finally, our cost  
10  
11 403 estimates were based on the prevalence of each risk approach in our study sample. Although  
12  
13 404 we present the total number of people estimated to require drug treatment using 2016 census  
14  
15 405 data, we were unable to identify population estimates of only those at risk of their first CVD  
16  
17 406 event due to lack of surveillance data. Nevertheless, our data are still valuable as we focus on  
18  
19 407 the comparative cost difference of each approach to underscore the potential cost savings in  
20  
21 408 implementing the total risk approach in Bangladesh.  
22  
23  
24  
25

## 26 410 **Conclusion**

27  
28 411 Our data show that the implementation of a total risk approach compared with a single  
29  
30 412 risk factor approach will reduce the health care expenditure by lowering drug costs, which  
31  
32 413 accounts for 60% of out-of-pocket spending in Bangladesh. This approach would be particularly  
33  
34 414 beneficial in Bangladesh, a low-resource country that should prioritize the development of health  
35  
36 415 policy for effective resource allocation in the public health sector. Furthermore, using the total  
37  
38 416 risk approach would increase service coverage and allow for the distribution of resources to  
39  
40 417 target those at highest risk of experiencing a heart attack or stroke. As the majority of the  
41  
42 418 Bangladeshi adult population aged  $\geq 40$  years have a low ten-year risk of CVD, strategies that  
43  
44 419 target those at highest risk of CVD coupled with public health policies to reduce the population-  
45  
46 420 level risk of CVD may be effective.  
47  
48  
49  
50  
51  
52  
53  
54  
55  
56  
57  
58  
59  
60

1  
2  
3 425 **Figure**

4  
5 426 Figure 1: Comparison of estimated annual costs using three different approaches to  
6  
7 427 pharmacologic intervention for cardiovascular disease treatment among adults in Bangladesh  
8  
9 428 aged 40 years and above  
10

11 429

12  
13 430

14  
15 431

16  
17 432

18  
19 433

20  
21 434

22  
23 435

24  
25 436

26  
27 437

28  
29 438

30  
31 439

32  
33 440

34  
35 441

36  
37 442

38  
39 443

40  
41 444

42  
43 445

44  
45 446

46  
47 447

48  
49 448

50  
51 449

52  
53 450

54  
55  
56  
57  
58  
59  
60

1  
2  
3 451 **Abbreviations**  
4

5 452 WHO: World Health Organization  
6

7 453 aPR: Adjusted prevalence ratio  
8

9 454 BBS: Bangladesh Bureau of Statistics  
10

11 455 BMI: Body mass index  
12

13 456 BP: Blood pressure  
14

15 457 CI: Confidence interval  
16

17 458 CVD: Cardiovascular disease  
18

19 459 ISH: International Society of Hypertension  
20

21 460 NCD: Non-communicable disease  
22

23 461 SEAR: South East-Asian Region  
24

25 462 SBP: Systolic blood pressure  
26

27 463 DBP: Diastolic blood pressure  
28

29 464 PSU: Primary sampling unit  
30

31 465 SD: Standard deviation  
32  
33  
34  
35 466  
36  
37 467  
38  
39 468  
40  
41 469  
42  
43 470  
44  
45 471  
46  
47 472  
48  
49 473  
50  
51 474  
52  
53 475  
54  
55 476  
56  
57  
58  
59  
60

1  
2  
3 477 **Footnotes**  
4

5 478 Ethics approval and consent to participate: We obtained ethical approval for this study from the  
6  
7 479 Institutional Review Board of the National Institute of Ophthalmology (Study ID: 128). We  
8  
9 480 provided participants with detailed study information using a printed handout prepared in  
10  
11 481 Bengali to inform them of the objective of the study. Written consent was obtained from  
12  
13 482 participants through signature or, if not possible, through thumbprint.  
14

15  
16 483 Competing Interests: The authors of this study declare no conflict of interest.  
17

18 484 Funding: Technical and financial assistance for this study was provided by the WHO Country  
19  
20 485 Office for Bangladesh.  
21

22 486 Consent to publish: All authors consent to the publication of this manuscript.  
23

24 487 Competing Interests: The authors declare no competing interests. The authors alone are  
25  
26 488 responsible for views expressed in this article and they do not necessarily represent the views,  
27  
28 489 decisions or policies of the institutions with which they are affiliated.  
29

30  
31 490 Availability of data and materials: The de-identified participant data used and/or analyzed during  
32  
33 491 the current study are available from the corresponding author on reasonable request. Please  
34  
35 492 contact M. Mostafa Zaman at zamanm@who.int for further information and guidelines.  
36

37 493 Authors contributions: JYI: conceptualized the manuscript, analyzed data, interpreted results  
38  
39 494 critically, and drafted the manuscript. MMZ: conceptualized the manuscript, designed the study,  
40  
41 495 interpreted results critically, guided manuscript writing, and critically reviewed it.: trained the field  
42  
43 496 team, implemented the survey, processed and analyzed data, and reviewed the manuscript.  
44

45 497 Acknowledgments: The study was completed by the National Institute of Ophthalmology (NIO)  
46  
47 498 of Bangladesh with technical assistance from the WHO Country Office for Bangladesh.  
48

49 499  
50

51 500  
52

53 501  
54

55 502  
56  
57  
58  
59  
60

503 **References**

- 504 1. Checkley W, Ghannem H, Irazola V, et al. Management of NCD in low- and middle-income  
505 countries. *Global heart* 2014;9(4):431-43. doi: 10.1016/j.gheart.2014.11.003
- 506 2. Islam SM, Purnat TD, Phuong NT, et al. Non-communicable diseases (NCDs) in developing  
507 countries: a symposium report. *Globalization and health* 2014;10:81. doi:  
508 10.1186/s12992-014-0081-9
- 509 3. Global action plan for the prevention and control of noncommunicable diseases 2013-2020.  
510 Geneva, Switzerland: World Health Organization; 2013 [Available from:  
511 [http://apps.who.int/iris/bitstream/10665/94384/1/9789241506236\\_eng.pdf?ua=1](http://apps.who.int/iris/bitstream/10665/94384/1/9789241506236_eng.pdf?ua=1)  
512 accessed 01/10 2019.
- 513 4. NCD Global Monitoring Framework: World Health Organization; 2017 [Available from:  
514 [http://www.who.int/nmh/global\\_monitoring\\_framework/en/](http://www.who.int/nmh/global_monitoring_framework/en/) accessed 09/29 2017.
- 515 5. Ndindjock R, Gedeon J, Mendis S, et al. Potential impact of single-risk-factor versus total risk  
516 management for the prevention of cardiovascular events in Seychelles. *Bulletin of the*  
517 *World Health Organization* 2011;89(4):286-95. doi: 10.2471/BLT.10.082370
- 518 6. Mendis S, Lindholm LH, Anderson SG, et al. Total cardiovascular risk approach to improve  
519 efficiency of cardiovascular prevention in resource constrain settings. *Journal of clinical*  
520 *epidemiology* 2011;64(12):1451-62. doi: 10.1016/j.jclinepi.2011.02.001
- 521 7. Fatema K, Zwar NA, Milton AH, et al. Cardiovascular risk assessment among rural  
522 population: findings from a cohort study in a peripheral region of Bangladesh. *Public*  
523 *health* 2016;137:73-80. doi: 10.1016/j.puhe.2016.02.016

- 1  
2  
3 524 8. Fatema K, Zwar NA, Milton AH, et al. Application of two versions of the WHO/international  
4  
5 525 society of hypertension absolute cardiovascular risk assessment tools in a rural  
6  
7 526 Bangladeshi population. *BMJ open* 2015;5(10):e008140. doi: 10.1136/bmjopen-2015-  
8  
9 527 008140  
10  
11  
12 528 9. Fatema K, Rahman B, Zwar NA, et al. Short-term predictive ability of selected cardiovascular  
13  
14 529 risk prediction models in a rural Bangladeshi population: a case-cohort study. *BMC*  
15  
16 530 *cardiovascular disorders* 2016;16(1):105. doi: 10.1186/s12872-016-0279-2  
17  
18  
19 531 10. Zaman MM, Rahman MM, Rahman MR, et al. Prevalence of risk factors for non-  
20  
21 532 communicable diseases in Bangladesh: Results from STEPS survey 2010. *Indian*  
22  
23 533 *journal of public health* 2016;60(1):17-25. doi: 10.4103/0019-557X.177290  
24  
25  
26  
27 534 11. Rahman M, Zaman MM, Islam JY, et al. Prevalence, treatment patterns, and risk factors of  
28  
29 535 hypertension and pre-hypertension among Bangladeshi adults. *Journal of human*  
30  
31 536 *hypertension* 2018;32(5):334-48. doi: 10.1038/s41371-017-0018-x  
32  
33  
34 537 12. Karim MN, Zaman MM, Rahman MM, et al. Sociodemographic Determinants of Low Fruit  
35  
36 538 and Vegetable Consumption Among Bangladeshi Adults: Results From WHO-STEP  
37  
38 539 Survey 2010. *Asia-Pacific journal of public health / Asia-Pacific Academic Consortium for*  
39  
40 540 *Public Health* 2017;29(3):189-98. doi: 10.1177/1010539517699059  
41  
42  
43  
44 541 13. Population and Housing Census 2001, updated in 2009 Dhaka, Bangladesh: Bangladesh  
45  
46 542 Bureau of Statistics 2009 [Available from:  
47  
48 543 <http://microdata.worldbank.org/index.php/catalog/1616> accessed 01/10 2019.  
49  
50  
51 544 14. Global report on diabetes Geneva, Switzerland: World Health Organization 2016 [Available  
52  
53 545 from: <https://www.who.int/diabetes/global-report/en/>.  
54  
55  
56  
57  
58  
59  
60



- 1  
2  
3 546 15. Mendis S, Lindholm LH, Mancia G, et al. World Health Organization (WHO) and  
4  
5 547 International Society of Hypertension (ISH) risk prediction charts: assessment of  
6  
7 548 cardiovascular risk for prevention and control of cardiovascular disease in low and  
8  
9 549 middle-income countries. *Journal of hypertension* 2007;25(8):1578-82. doi:  
10  
11 550 10.1097/HJH.0b013e3282861fd3  
12  
13  
14  
15 551 16. Population Projection of Bangladesh Dynamics and Trends 2011-2061 Dhaka, Bangladesh  
16  
17 552 Bangladesh Bureau of Statistics 2015 [Available from:  
18  
19 553 [http://203.112.218.65:8008/WebTestApplication/userfiles/Image/PopMonographs/Popula](http://203.112.218.65:8008/WebTestApplication/userfiles/Image/PopMonographs/PopulationProjection.pdf)  
20  
21 554 [tionProjection.pdf](http://203.112.218.65:8008/WebTestApplication/userfiles/Image/PopMonographs/PopulationProjection.pdf) accessed 11/17 2018.  
22  
23  
24 555 17. Cravedi P, Sharma SK, Bravo RF, et al. Preventing renal and cardiovascular risk by renal  
25  
26 556 function assessment: insights from a cross-sectional study in low-income countries and  
27  
28 557 the USA. *BMJ open* 2012;2(5) doi: 10.1136/bmjopen-2012-001357  
29  
30  
31 558 18. Multisectoral Action Plan for the Noncommunicable Disease Control and Prevention (2016-  
32  
33 559 2021) Dhaka, Bangladesh: Ministry of Health and Family Welfare, Government of the  
34  
35 560 People's Republic Bangladesh.; 2015 [Available from:  
36  
37 561 [http://www.searo.who.int/entity/ncd\\_tobacco\\_surveillance/monitoring\\_fw/pages\\_from\\_ba](http://www.searo.who.int/entity/ncd_tobacco_surveillance/monitoring_fw/pages_from_ban_ncd_action_plan_2016_2021_me_not_approved.pdf)  
38  
39 562 [n\\_ncd\\_action\\_plan\\_2016\\_2021\\_me\\_not\\_approved.pdf](http://www.searo.who.int/entity/ncd_tobacco_surveillance/monitoring_fw/pages_from_ban_ncd_action_plan_2016_2021_me_not_approved.pdf) accessed 12/15 2018.  
40  
41  
42  
43 563 19. Non Communicable Diseases in Bangladesh: Current Scenario and Future Directions  
44  
45 564 Dhaka, Bangladesh2017 [Available from:  
46  
47 565 [http://www.brac.net/images/news/2017/bhw\\_report2016\\_final.pdf](http://www.brac.net/images/news/2017/bhw_report2016_final.pdf) accessed 05/10 2019.  
48  
49  
50 566 20. Health and Morbidity Status Survey-2012 Dhaka, Bangladesh: Bangladesh Bureau of  
51  
52 567 Statistics, Ministry of Planning.; 2013 [Available from:  
53  
54  
55  
56  
57  
58  
59  
60

1  
2  
3 568 [http://bbs.portal.gov.bd/sites/default/files/files/bbs.portal.gov.bd/page/4c7eb0f0\\_e780\\_46](http://bbs.portal.gov.bd/sites/default/files/files/bbs.portal.gov.bd/page/4c7eb0f0_e780_46)  
4  
5 569 [86\\_b546\\_b4fa0a8889a5/HMSS.pdf](86_b546_b4fa0a8889a5/HMSS.pdf) accessed 12/25 2018.  
6  
7

8 570 21. Noncommunicable Diseases Progress Monitor 2017 Geneva, Switzerland: World Health  
9 Organization; 2017 [231]. Available from: [https://www.who.int/nmh/publications/ncd-](https://www.who.int/nmh/publications/ncd-progress-monitor-2017/en/)  
10 571 [progress-monitor-2017/en/](https://www.who.int/nmh/publications/ncd-progress-monitor-2017/en/) accessed 02/15 2019.  
11  
12 572  
13  
14

15 573 22. NIPORT. Bangladesh Health Facility Survey 2014 Dhaka, Bangladesh: National Institute of  
16 Population Research and Training (NIPORT), Associates for Community and Population  
17 Research (ACPR), and ICF International. ; 2016 [Available from:  
18 574  
19  
20 575 <https://dhsprogram.com/pubs/pdf/SPA23/SPA23.pdf> accessed 03/15 2019.  
21  
22 576  
23  
24

25 577

26 578

27 579

28 580

29 581

30 582

31 583

32 584

33 585

34 586

35

36

37

38

39

40

41

42

43

44

45

46

**Table 1: Background Characteristics of Bangladeshi Adult Participants (n = 6189)**

| Characteristics                               | Total (n = 6189) |      |      | Men (n = 2824) |              |      | Women (n = 3365) |              |      |
|-----------------------------------------------|------------------|------|------|----------------|--------------|------|------------------|--------------|------|
|                                               | Mean (SD)        | n    | %    | Mean (SD)      | n            | %    | Mean (SD)        | n            | %    |
| Age (years)                                   | 52.9 (9.9)       |      |      | 53.5 (10.1)    |              |      | 52.5 (9.8)       |              |      |
| Education (years)                             | 3.1 (4.2)        |      |      | 4.3 (4.8)      |              |      | 2.1 (3.3)        |              |      |
| Area of Residence                             |                  |      |      |                |              |      |                  |              |      |
| Urban                                         |                  | 1873 | 30.2 |                | 808          | 28.6 |                  | 1065         | 31.6 |
| Rural                                         |                  | 4316 | 69.8 |                | 2016         | 71.4 |                  | 2300         | 68.4 |
| Occupation                                    |                  |      |      |                |              |      |                  |              |      |
| Professional employment <sup>‡</sup>          |                  | 1007 | 16.3 |                | 880          | 31.3 |                  | 127          | 3.8  |
| Industrial worker/Day Laborer                 |                  | 1600 | 25.9 |                | 1440         | 51.2 |                  | 160          | 4.8  |
| Housework                                     |                  | 2697 | 43.7 |                | -            | -    |                  | 2697         | 80.3 |
| Unemployed/Retired                            |                  | 735  | 11.9 |                | 386          | 13.7 |                  | 349          | 10.4 |
| Other <sup>§</sup>                            |                  | 131  | 2.1  |                | 106          | 3.8  |                  | 25           | 0.7  |
| Smoking Tobacco Use <sup>  </sup>             |                  |      |      |                |              |      |                  |              |      |
| Current User                                  |                  | 1493 | 24.2 |                | 1432         | 50.7 |                  | 61           | 1.8  |
| Ever User                                     |                  | 2261 | 36.5 |                | 2150         | 76.1 |                  | 111          | 3.3  |
| Smokeless Tobacco Use <sup>◊</sup>            |                  |      |      |                |              |      |                  |              |      |
| Current User                                  |                  | 3078 | 49.7 |                | 1208         | 42.8 |                  | 1870         | 55.6 |
| Ever User                                     |                  | 3469 | 56.1 |                | 1433         | 50.7 |                  | 2046         | 60.5 |
| Alcohol use in the last 30 days               |                  |      |      |                |              |      |                  |              |      |
| Yes                                           |                  | 75   | 1.2  |                | 68           | 2.4  |                  | 7            | 0.2  |
| Body Mass Index <sup>  </sup>                 | 21.9 (4.1)       |      |      |                | 21.4 (3.7)   |      |                  | 22.3 (4.4)   |      |
| Waist Circumference** (cm)                    | 82.4 (13.3)      |      |      |                | 81.8 (10.5)  |      |                  | 82.8 (15.2)  |      |
| Blood Pressure                                |                  |      |      |                |              |      |                  |              |      |
| Systolic Blood Pressure <sup>††</sup> (mmHg)  | 119.7 (15.2)     |      |      |                | 119.8 (14.9) |      |                  | 119.7 (15.5) |      |
| Diastolic Blood Pressure <sup>††</sup> (mmHg) | 80.3 (9.5)       |      |      |                | 80.2 (9.4)   |      |                  | 80.3 (9.7)   |      |
| Blood Glucose Levels <sup>§§</sup> (mmol/L)   | 6.9 (3.0)        |      |      |                | 6.9 (3.0)    |      |                  | 6.9 (2.9)    |      |

Abbreviations: SD: Standard Deviation; CM: centimeters; mmHg: millimeter of mercury; mmol/L: millimoles per liter

<sup>‡</sup>Professional occupation includes: Government employee, private company employee, businessman

<sup>§</sup>Other occupation includes: Shop keeper, weavers, driver, student, beggar, cook, carpenter, and tailor

1  
2  
3 ¶Excluding smokeless tobacco | Missing values, n = 18; Men, n = 11; FeMen, n = 7

4 ◊Smokeless tobacco use includes jorda, white leaf (shaada pata), gul, etc.

5  
6 ¶Body mass index (BMI) calculated by weight in kilogram divided by height in meter squared  
7  
8  
9  
10  
11  
12  
13  
14  
15  
16  
17  
18  
19  
20  
21  
22  
23  
24  
25  
26  
27  
28  
29  
30  
31  
32  
33  
34  
35  
36  
37  
38  
39  
40  
41  
42  
43  
44  
45  
46  
47

For peer review only

**Table 2: Ten-year risk of combined myocardial infarction and stroke (fatal and non-fatal) by gender, using the WHO/ISH SEAR-D charts without cholesterol (n = 6090)**

|                           | Total (n = 6090) |      |             | Men (n = 2779) |      |             | Women (n = 3311) |      |             | P*     |
|---------------------------|------------------|------|-------------|----------------|------|-------------|------------------|------|-------------|--------|
|                           | n                | %    | CI          | n              | %    | CI          | n                | %    | CI          |        |
| Low Risk (<10 %)          | 5189             | 85.2 | 84.3 - 86.1 | 2309           | 83.1 | 81.6 - 84.4 | 2880             | 87.0 | 85.8 - 88.1 | <0.001 |
| Moderate Risk (10 - <20%) | 760              | 12.5 | 11.6 - 13.3 | 391            | 14.1 | 12.8 - 15.4 | 369              | 11.1 | 10.1 - 12.2 | 0.001  |
| High Risk (20 - <30%)     | 107              | 1.8  | 1.4 - 2.1   | 60             | 2.2  | 1.7 - 2.8   | 47               | 1.4  | 1.0 - 1.9   | 0.029  |
| Very High Risk (≥ 30%)    | 34               | 0.6  | 0.4 - 0.8   | 19             | 0.7  | 0.4 - 1.1   | 15               | 0.5  | 0.3 - 0.7   | 0.229  |

Abbreviations: CI, confidence interval; WHO, World Health Organization; ISH, International Society of Hypertension; SEAR, South East Asian Region  
\* P-value based on chi-square test

For peer review only

**Table 3: Estimation of percentage of population requiring drug treatment based on total risk approach in comparison to single risk factor approaches (n = 6090)**

|       | <u>Total Risk Approach</u>                       |                                        |                                                  |                                        | <u>Single Risk Factor Approach</u>                         |
|-------|--------------------------------------------------|----------------------------------------|--------------------------------------------------|----------------------------------------|------------------------------------------------------------|
|       | <u>Cardiovascular Risk <math>\geq</math> 30%</u> |                                        | <u>Cardiovascular Risk <math>\geq</math> 20%</u> |                                        | BP $\geq$ 140/90 (SBP $\geq$ 140 + isolated raised DBP), % |
|       | CV Risk $\geq$ 30% alone, %                      | CV Risk $\geq$ 30% + BP $\geq$ 160/100 | CV Risk $\geq$ 20% alone, %                      | CV Risk $\geq$ 20% + BP $\geq$ 160/100 |                                                            |
| Men   | 0.68                                             | 4.3                                    | 2.8                                              | 3.5                                    | 18.8                                                       |
| women | 0.45                                             | 4.8                                    | 1.9                                              | 4.1                                    | 20.2                                                       |
| Total | 0.56                                             | 4.5                                    | 2.3                                              | 3.8                                    | 19.6                                                       |

Abbreviations: CV, cardiovascular; BP, blood pressure; SBP, systolic blood pressure; DBP, diastolic blood pressure

**Table 4: Population projections and comparison of medicine costs (US\$) for implementing total risk approach vs. single risk factor approach in Bangladesh SEAR-D**

| Estimated annual total cost of CVD medication treatment per million population† |                                                               |                                                                  |                                                                        |                                                                |            |             |                     |              |             |
|---------------------------------------------------------------------------------|---------------------------------------------------------------|------------------------------------------------------------------|------------------------------------------------------------------------|----------------------------------------------------------------|------------|-------------|---------------------|--------------|-------------|
| <b>Total risk approach CV Risk ≥ 30% alone</b>                                  |                                                               |                                                                  |                                                                        |                                                                | Aspirin    | Enalapril   | Hydrochlorothiazide | Simvastatine | Total       |
|                                                                                 | Total no. of people in the general population (in thousands)* | Percentage of population aged ≥40 years requiring medication (%) | Total no. of people estimated to require drug treatment (in thousands) | No. of people per million population (aged 40 years and older) |            |             |                     |              |             |
| <b>Age Group</b>                                                                |                                                               |                                                                  |                                                                        |                                                                |            |             |                     |              |             |
| <b>Men</b>                                                                      |                                                               |                                                                  |                                                                        |                                                                |            |             |                     |              |             |
| 40 to 49                                                                        | 9210                                                          | 0.1                                                              | 921                                                                    | 1000                                                           | \$1,642.5  | \$8,687.0   | \$3,029.5           | \$15,549.0   | \$28,908.0  |
| 50 to 59                                                                        | 6303                                                          | 0.4                                                              | 2521                                                                   | 4000                                                           | \$6,570.0  | \$34,748.0  | \$12,118.0          | \$62,196.0   | \$115,632.0 |
| 60 to 69                                                                        | 3730                                                          | 2.5                                                              | 9325                                                                   | 25000                                                          | \$41,062.5 | \$217,175.0 | \$75,737.5          | \$388,725.0  | \$722,700.0 |
| ≥ 70                                                                            | 1881                                                          | 0.7                                                              | 1317                                                                   | 7000                                                           | \$11,497.5 | \$60,809.0  | \$21,206.5          | \$108,843.0  | \$202,356.0 |
| Total                                                                           | 21124                                                         | 0.7                                                              | 14787                                                                  | 7000                                                           | \$11,497.5 | \$60,809.0  | \$21,206.5          | \$108,843.0  | \$202,356.0 |
| <b>Women</b>                                                                    |                                                               |                                                                  |                                                                        |                                                                |            |             |                     |              |             |
| 40 to 49                                                                        | 9087                                                          | 0.0                                                              | 0                                                                      | 0                                                              | \$0.0      | \$0.0       | \$0.0               | \$0.0        | \$0.0       |
| 50 to 59                                                                        | 5662                                                          | 0.3                                                              | 1699                                                                   | 3000                                                           | \$4,927.5  | \$26,061.0  | \$9,088.5           | \$46,647.0   | \$86,724.0  |
| 60 to 69                                                                        | 3257                                                          | 0.4                                                              | 1303                                                                   | 4000                                                           | \$6,570.0  | \$34,748.0  | \$12,118.0          | \$62,196.0   | \$115,632.0 |
| ≥ 70                                                                            | 1638                                                          | 3.3                                                              | 5405                                                                   | 33000                                                          | \$54,202.5 | \$286,671.0 | \$99,973.5          | \$513,117.0  | \$953,964.0 |
| Total                                                                           | 19644                                                         | 0.5                                                              | 9822                                                                   | 5000                                                           | \$8,212.5  | \$43,435.0  | \$15,147.5          | \$77,745.0   | \$144,540.0 |
| <b>All</b>                                                                      |                                                               |                                                                  |                                                                        |                                                                |            |             |                     |              |             |
| 40 to 49                                                                        | 18296                                                         | 0.0                                                              | 732                                                                    | 400                                                            | \$657.0    | \$3,474.8   | \$1,211.8           | \$6,219.6    | \$11,563.2  |
| 50 to 59                                                                        | 11965                                                         | 0.3                                                              | 3590                                                                   | 3000                                                           | \$4,927.5  | \$26,061.0  | \$9,088.5           | \$46,647.0   | \$86,724.0  |
| 60 to 69                                                                        | 6989                                                          | 1.3                                                              | 9086                                                                   | 13000                                                          | \$21,352.5 | \$112,931.0 | \$39,383.5          | \$202,137.0  | \$375,804.0 |

|       |       |     |       |       |            |             |            |             |             |
|-------|-------|-----|-------|-------|------------|-------------|------------|-------------|-------------|
| >= 70 | 3518  | 2.0 | 7036  | 20000 | \$32,850.0 | \$173,740.0 | \$60,590.0 | \$310,980.0 | \$578,160.0 |
| Total | 40768 | 0.6 | 24461 | 6000  | \$9,855.0  | \$52,122.0  | \$18,177.0 | \$93,294.0  | \$173,448.0 |

**Total risk approach CV Risk ≥ 20% alone**

|                  | Total no. of people in the general population (in thousands)* | Percentage of population aged ≥40 years requiring medication (%) | Total no. of people estimated to require drug treatment (in thousands) | No. of people per million population (aged 40 years and older) | Aspirin     | Enalapril   | Hydrochlorothiazide | Simvastatine  | Total         |
|------------------|---------------------------------------------------------------|------------------------------------------------------------------|------------------------------------------------------------------------|----------------------------------------------------------------|-------------|-------------|---------------------|---------------|---------------|
| <b>Age Group</b> |                                                               |                                                                  |                                                                        |                                                                |             |             |                     |               |               |
| <b>Men</b>       |                                                               |                                                                  |                                                                        |                                                                |             |             |                     |               |               |
| 40 to 49         | 9210                                                          | 1.9                                                              | 17499                                                                  | 19000                                                          | \$31,207.5  | \$165,053.0 | \$57,560.5          | \$295,431.0   | \$549,252.0   |
| 50 to 59         | 6303                                                          | 1.6                                                              | 10085                                                                  | 16000                                                          | \$26,280.0  | \$138,992.0 | \$48,472.0          | \$248,784.0   | \$462,528.0   |
| 60 to 69         | 3730                                                          | 4.1                                                              | 15293                                                                  | 41000                                                          | \$67,342.5  | \$356,167.0 | \$124,209.5         | \$637,509.0   | \$1,185,228.0 |
| >= 70            | 1881                                                          | 2.4                                                              | 4514                                                                   | 24000                                                          | \$39,420.0  | \$208,488.0 | \$72,708.0          | \$373,176.0   | \$693,792.0   |
| Total            | 21124                                                         | 2.3                                                              | 48585                                                                  | 23000                                                          | \$37,777.5  | \$199,801.0 | \$69,678.5          | \$357,627.0   | \$664,884.0   |
| <b>Women</b>     |                                                               |                                                                  |                                                                        |                                                                |             |             |                     |               |               |
| 40 to 49         | 9087                                                          | 0.8                                                              | 7270                                                                   | 8000                                                           | \$13,140.0  | \$69,496.0  | \$24,236.0          | \$124,392.0   | \$231,264.0   |
| 50 to 59         | 5662                                                          | 2.4                                                              | 13589                                                                  | 24000                                                          | \$39,420.0  | \$208,488.0 | \$72,708.0          | \$373,176.0   | \$693,792.0   |
| 60 to 69         | 3257                                                          | 2.0                                                              | 6514                                                                   | 20000                                                          | \$32,850.0  | \$173,740.0 | \$60,590.0          | \$310,980.0   | \$578,160.0   |
| >= 70            | 1638                                                          | 7.4                                                              | 12121                                                                  | 74000                                                          | \$121,545.0 | \$642,838.0 | \$224,183.0         | \$1,150,626.0 | \$2,139,192.0 |
| Total            | 19644                                                         | 2.1                                                              | 41252                                                                  | 21000                                                          | \$34,492.5  | \$182,427.0 | \$63,619.5          | \$326,529.0   | \$607,068.0   |
| <b>All</b>       |                                                               |                                                                  |                                                                        |                                                                |             |             |                     |               |               |
| 40 to 49         | 18296                                                         | 1.3                                                              | 23785                                                                  | 13000                                                          | \$21,352.5  | \$112,931.0 | \$39,383.5          | \$202,137.0   | \$375,804.0   |
| 50 to 59         | 11965                                                         | 2.0                                                              | 23930                                                                  | 20000                                                          | \$32,850.0  | \$173,740.0 | \$60,590.0          | \$310,980.0   | \$578,160.0   |
| 60 to 69         | 6989                                                          | 2.9                                                              | 20268                                                                  | 29000                                                          | \$47,632.5  | \$251,923.0 | \$87,855.5          | \$450,921.0   | \$838,332.0   |
| >= 70            | 3518                                                          | 4.9                                                              | 17238                                                                  | 49000                                                          | \$80,482.5  | \$425,663.0 | \$148,445.5         | \$761,901.0   | \$1,416,492.0 |
| Total            | 40768                                                         | 2.2                                                              | 89690                                                                  | 22000                                                          | \$36,135.0  | \$191,114.0 | \$66,649.0          | \$342,078.0   | \$635,976.0   |

**Single Risk Factor Approach: BP ≥ 140/90 (SBP ≥ 140 + isolated raised DBP), %**



|                  | Total no. of people in the general population (in thousands)* | Percentage of population aged ≥40 years requiring medication (%) | Total no. of people estimated to require drug treatment (in thousands) | No. of people per million population (aged 40 years and older) | Aspirin     | Enalapril     | Hydrochlorothiazide | Simvastatine  | Total         |
|------------------|---------------------------------------------------------------|------------------------------------------------------------------|------------------------------------------------------------------------|----------------------------------------------------------------|-------------|---------------|---------------------|---------------|---------------|
| <b>Age Group</b> |                                                               |                                                                  |                                                                        |                                                                |             |               |                     |               |               |
| <b>Men</b>       |                                                               |                                                                  |                                                                        |                                                                |             |               |                     |               |               |
| 40 to 49         | 9210                                                          | 14.5                                                             | 133545                                                                 | 145000                                                         | \$238,162.5 | \$1,259,615.0 | \$439,277.5         | \$2,254,605.0 | \$4,191,660.0 |
| 50 to 59         | 6303                                                          | 18.4                                                             | 115975                                                                 | 184000                                                         | \$302,220.0 | \$1,598,408.0 | \$557,428.0         | \$2,861,016.0 | \$5,319,072.0 |
| 60 to 69         | 3730                                                          | 24.7                                                             | 92131                                                                  | 247000                                                         | \$405,697.5 | \$2,145,689.0 | \$748,286.5         | \$3,840,603.0 | \$7,140,276.0 |
| ≥ 70             | 1881                                                          | 26.0                                                             | 48906                                                                  | 260000                                                         | \$427,050.0 | \$2,258,620.0 | \$787,670.0         | \$4,042,740.0 | \$7,516,080.0 |
| Total            | 21124                                                         | 18.8                                                             | 397131                                                                 | 188000                                                         | \$308,790.0 | \$1,633,156.0 | \$569,546.0         | \$2,923,212.0 | \$5,434,704.0 |
| <b>Women</b>     |                                                               |                                                                  |                                                                        |                                                                |             |               |                     |               |               |
| 40 to 49         | 9087                                                          | 16.9                                                             | 153570                                                                 | 169000                                                         | \$277,582.5 | \$1,468,103.0 | \$511,985.5         | \$2,627,781.0 | \$4,885,452.0 |
| 50 to 59         | 5662                                                          | 23.8                                                             | 134756                                                                 | 238000                                                         | \$390,915.0 | \$2,067,506.0 | \$721,021.0         | \$3,700,662.0 | \$6,880,104.0 |
| 60 to 69         | 3257                                                          | 21.3                                                             | 69374                                                                  | 213000                                                         | \$349,852.5 | \$1,850,331.0 | \$645,283.5         | \$3,311,937.0 | \$6,157,404.0 |
| ≥ 70             | 1638                                                          | 23.5                                                             | 38493                                                                  | 235000                                                         | \$385,987.5 | \$2,041,445.0 | \$711,932.5         | \$3,654,015.0 | \$6,793,380.0 |
| Total            | 19644                                                         | 20.2                                                             | 396809                                                                 | 202000                                                         | \$331,785.0 | \$1,754,774.0 | \$611,959.0         | \$3,140,898.0 | \$5,839,416.0 |
| <b>All</b>       |                                                               |                                                                  |                                                                        |                                                                |             |               |                     |               |               |
| 40 to 49         | 18296                                                         | 15.8                                                             | 289077                                                                 | 158000                                                         | \$259,515.0 | \$1,372,546.0 | \$478,661.0         | \$2,456,742.0 | \$4,567,464.0 |
| 50 to 59         | 11965                                                         | 21.2                                                             | 253658                                                                 | 212000                                                         | \$348,210.0 | \$1,841,644.0 | \$642,254.0         | \$3,296,388.0 | \$6,128,496.0 |
| 60 to 69         | 6989                                                          | 22.8                                                             | 159349                                                                 | 228000                                                         | \$374,490.0 | \$1,980,636.0 | \$690,726.0         | \$3,545,172.0 | \$6,591,024.0 |
| ≥ 70             | 3518                                                          | 24.7                                                             | 86895                                                                  | 247000                                                         | \$405,697.5 | \$2,145,689.0 | \$748,286.5         | \$3,840,603.0 | \$7,140,276.0 |
| Total            | 40768                                                         | 19.6                                                             | 799053                                                                 | 196000                                                         | \$321,930.0 | \$1,702,652.0 | \$593,782.0         | \$3,047,604.0 | \$5,665,968.0 |

\*Source: 2016 Population Projections (using 2011 Census data) Bangladesh Bureau of Statistics, Statistics and Informatics Division, Ministry of Planning

† Price for 100 tablets in US\$: Aspirin (0.45), Enalapril (2.38), Hydrochlorothiazide (0.83), Simvastatine (4.29); one tablet is taken per day

**Appendix Table 1: Cost of common drugs used to treat cardiovascular disease in Bangladesh (converted to US\$)**

| Drug Name                 | Dose   | Number of Tablets | Category                                                    | Median price (in Bangladeshi Taka) | Price (in US\$)* |
|---------------------------|--------|-------------------|-------------------------------------------------------------|------------------------------------|------------------|
| Aspirin                   | 100 mg | 100 tablets       | Antiplatelet drugs                                          | 38BDT                              | 0.45             |
| Atenolol                  | 50 mg  | 100 tablets       | Antihypertensive, Beta-adrenoreceptor blocking drugs        | 77BDT                              | 0.92             |
| Captopril                 | 25 mg  | 100 tablets       | Antihypertensive, ACE inhibitors                            | 300 BDT                            | 3.58             |
| Chlorthalidone            | 25 mg  | 30 tablets        | Antihypertensive, thiazide diuretics                        | 60 BDT                             | 0.72             |
| Enalapril                 | 10 mg  | 100 tablets       | Antihypertensive, ACE inhibitors                            | 200 BDT                            | 2.38             |
| Frusemide                 | 40 mg  | 100 tablets       | Antihypertensive, loop diuretics                            | 53 BDT                             | 0.63             |
| Hydrochlorothiazide       | 25 mg  | 100 tablets       | Antihypertensive, thiazide diuretics                        | 70 BDT                             | 0.83             |
| Isosorbide dinitrate      | 10 mg  | 100 tablets       | Angina treatment, nitrates - coronary vasodilators          | 35 BDT                             | 0.42             |
| Labetalol                 | 100 mg | 60 tablets        | Antihypertensive, Beta-adrenoreceptor blocking drugs        | 361.2 BDT                          | 4.31             |
| Losartan                  | 50 mg  | 100 tablets       | Antihypertensive, Angiotensin-II receptor blocker           | 600 BDT                            | 7.15             |
| Lovastatine               | 20 mg  | 30 tablets        | Lipid regulation, statin                                    | 303.3 BDT                          | 3.62             |
| Methyldopa                | 250 mg | 100 tables        | Antihypertensive, Centrally acting or central sympatholytic | 308 BDT                            | 3.67             |
| Nifedipine (slow release) | 20 mg  | 100 tablets       | Angina treatment, calcium-channel blocker                   | 64 BDT                             | 0.76             |
| Propranolol hydrochloride | 10 mg  | 100 tablets       | Antihypertensive, Beta-adrenoreceptor blocking drugs        | 24 BDT                             | 0.29             |
| Simvastatine              | 10 mg  | 30 tablets        | Lipid regulation, statin                                    | 360 BDT                            | 4.29             |

1  
2  
3  
4  
5  
6  
7  
8  
9  
10  
11  
12  
13  
14  
15  
16  
17  
18  
19  
20  
21  
22  
23  
24  
25  
26  
27  
28  
29  
30  
31  
32  
33  
34  
35  
36  
37  
38  
39  
40  
41  
42  
43  
44  
45  
46  
47

|                |                       |             |                                                                        |          |       |
|----------------|-----------------------|-------------|------------------------------------------------------------------------|----------|-------|
| Spironolactone | 25 mg                 | 100 tablets | Antihypertensive, potassium-sparing diuretics & aldosterone antagonist | 202 BDT  | 2.41  |
| Streptokinase  | 1.5 million unit/vial | One vial    | Anticoagulant                                                          | 3100 BDT | 36.96 |
| Warfarin       | 5 mg                  | 100 tablets | Anticoagulant                                                          | 300 BDT  | 3.58  |

Abbreviations: mg, milligrams; US, United States; BDT, Bangladeshi Taka

\*Price conversion based on exchange rate on 02/07/2019

For peer review only

1  
2  
3  
4  
5  
6  
7  
8  
9  
10  
11  
12  
13  
14  
15  
16  
17  
18  
19  
20  
21  
22  
23  
24  
25  
26  
27  
28  
29  
30  
31  
32  
33  
34  
35  
36  
37  
38  
39  
40  
41  
42  
43  
44  
45  
46  
47  
48  
49  
50  
51  
52  
53  
54  
55  
56  
57  
58  
59  
60

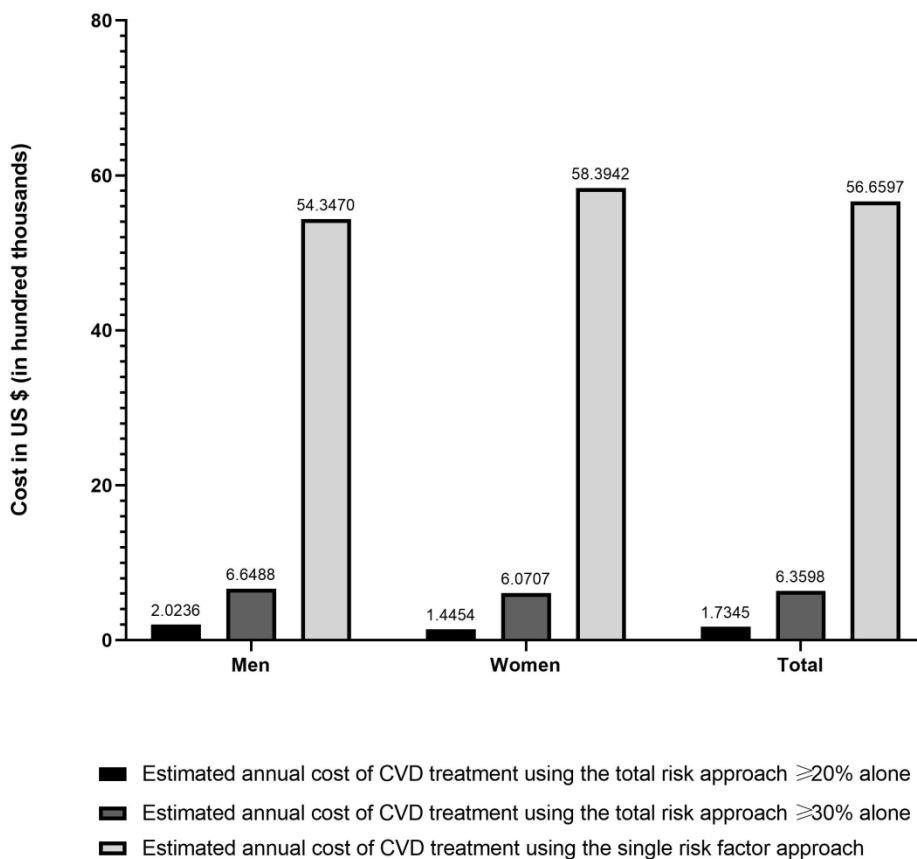

Comparison of estimated annual costs using three different approaches to pharmacologic intervention for cardiovascular disease treatment among adults in Bangladesh aged 40 years and above

196x175mm (300 x 300 DPI)

**STROBE 2007 (v4) Statement—Checklist of items that should be included in reports of *cross-sectional studies***

| Section/Topic                | Item # | Recommendation                                                                                                                                                                       | Reported on page # |
|------------------------------|--------|--------------------------------------------------------------------------------------------------------------------------------------------------------------------------------------|--------------------|
| <b>Title and abstract</b>    | 1      | (a) Indicate the study’s design with a commonly used term in the title or the abstract                                                                                               | 2                  |
|                              |        | (b) Provide in the abstract an informative and balanced summary of what was done and what was found                                                                                  | 2-3                |
| <b>Introduction</b>          |        |                                                                                                                                                                                      |                    |
| Background/rationale         | 2      | Explain the scientific background and rationale for the investigation being reported                                                                                                 | 5-6                |
| Objectives                   | 3      | State specific objectives, including any prespecified hypotheses                                                                                                                     | 6                  |
| <b>Methods</b>               |        |                                                                                                                                                                                      |                    |
| Study design                 | 4      | Present key elements of study design early in the paper                                                                                                                              | 6                  |
| Setting                      | 5      | Describe the setting, locations, and relevant dates, including periods of recruitment, exposure, follow-up, and data collection                                                      | 7                  |
| Participants                 | 6      | (a) Give the eligibility criteria, and the sources and methods of selection of participants                                                                                          | 6                  |
| Variables                    | 7      | Clearly define all outcomes, exposures, predictors, potential confounders, and effect modifiers. Give diagnostic criteria, if applicable                                             | 8-10               |
| Data sources/<br>measurement | 8*     | For each variable of interest, give sources of data and details of methods of assessment (measurement). Describe comparability of assessment methods if there is more than one group | 7-10               |
| Bias                         | 9      | Describe any efforts to address potential sources of bias                                                                                                                            | 6-7 & 15-16        |
| Study size                   | 10     | Explain how the study size was arrived at                                                                                                                                            | 7                  |
| Quantitative variables       | 11     | Explain how quantitative variables were handled in the analyses. If applicable, describe which groupings were chosen and why                                                         | 9-10               |
| Statistical methods          | 12     | (a) Describe all statistical methods, including those used to control for confounding                                                                                                | 9-10               |
|                              |        | (b) Describe any methods used to examine subgroups and interactions                                                                                                                  | 8-11               |
|                              |        | (c) Explain how missing data were addressed                                                                                                                                          | 9                  |
|                              |        | (d) If applicable, describe analytical methods taking account of sampling strategy                                                                                                   | N/A                |
|                              |        | (e) Describe any sensitivity analyses                                                                                                                                                | N/A                |
| <b>Results</b>               |        |                                                                                                                                                                                      |                    |

1  
2  
3  
4  
5  
6  
7  
8  
9  
10  
11  
12  
13  
14  
15  
16  
17  
18  
19  
20  
21  
22  
23  
24  
25  
26  
27  
28  
29  
30  
31  
32  
33  
34  
35  
36  
37  
38  
39  
40  
41  
42  
43  
44  
45  
46

|                          |     |                                                                                                                                                                                                              |       |
|--------------------------|-----|--------------------------------------------------------------------------------------------------------------------------------------------------------------------------------------------------------------|-------|
| Participants             | 13* | (a) Report numbers of individuals at each stage of study—eg numbers potentially eligible, examined for eligibility, confirmed eligible, included in the study, completing follow-up, and analysed            | 10    |
|                          |     | (b) Give reasons for non-participation at each stage                                                                                                                                                         | N/A   |
|                          |     | (c) Consider use of a flow diagram                                                                                                                                                                           | N/A   |
| Descriptive data         | 14* | (a) Give characteristics of study participants (eg demographic, clinical, social) and information on exposures and potential confounders                                                                     | 10    |
|                          |     | (b) Indicate number of participants with missing data for each variable of interest                                                                                                                          | 9     |
| Outcome data             | 15* | Report numbers of outcome events or summary measures                                                                                                                                                         |       |
| Main results             | 16  | (a) Give unadjusted estimates and, if applicable, confounder-adjusted estimates and their precision (eg, 95% confidence interval). Make clear which confounders were adjusted for and why they were included | N/A   |
|                          |     | (b) Report category boundaries when continuous variables were categorized                                                                                                                                    | N/A   |
|                          |     | (c) If relevant, consider translating estimates of relative risk into absolute risk for a meaningful time period                                                                                             | N/A   |
| Other analyses           | 17  | Report other analyses done—eg analyses of subgroups and interactions, and sensitivity analyses                                                                                                               | 10    |
| <b>Discussion</b>        |     |                                                                                                                                                                                                              |       |
| Key results              | 18  | Summarise key results with reference to study objectives                                                                                                                                                     | 12-14 |
| Limitations              | 19  | Discuss limitations of the study, taking into account sources of potential bias or imprecision. Discuss both direction and magnitude of any potential bias                                                   | 15-16 |
| Interpretation           | 20  | Give a cautious overall interpretation of results considering objectives, limitations, multiplicity of analyses, results from similar studies, and other relevant evidence                                   | 13-16 |
| Generalisability         | 21  | Discuss the generalisability (external validity) of the study results                                                                                                                                        | 15    |
| <b>Other information</b> |     |                                                                                                                                                                                                              |       |
| Funding                  | 22  | Give the source of funding and the role of the funders for the present study and, if applicable, for the original study on which the present article is based                                                | 19    |

\*Give information separately for cases and controls in case-control studies and, if applicable, for exposed and unexposed groups in cohort and cross-sectional studies.

**Note:** An Explanation and Elaboration article discusses each checklist item and gives methodological background and published examples of transparent reporting. The STROBE checklist is best used in conjunction with this article (freely available on the Web sites of PLoS Medicine at <http://www.plosmedicine.org/>, Annals of Internal Medicine at <http://www.annals.org/>, and Epidemiology at <http://www.epidem.com/>). Information on the STROBE Initiative is available at [www.strobe-statement.org](http://www.strobe-statement.org).

# BMJ Open

## Estimation of total cardiovascular risk using the 2019 WHO CVD prediction charts and comparison of population-level costs based on alternative drug therapy guidelines in Bangladesh: a population-based study of adults in Bangladesh

|                                 |                                                                                                                                                                                                                                                                                                                                                                                                                                                               |
|---------------------------------|---------------------------------------------------------------------------------------------------------------------------------------------------------------------------------------------------------------------------------------------------------------------------------------------------------------------------------------------------------------------------------------------------------------------------------------------------------------|
| Journal:                        | <i>BMJ Open</i>                                                                                                                                                                                                                                                                                                                                                                                                                                               |
| Manuscript ID                   | bmjopen-2019-035842.R1                                                                                                                                                                                                                                                                                                                                                                                                                                        |
| Article Type:                   | Original research                                                                                                                                                                                                                                                                                                                                                                                                                                             |
| Date Submitted by the Author:   | 06-Feb-2020                                                                                                                                                                                                                                                                                                                                                                                                                                                   |
| Complete List of Authors:       | Islam, Jessica; World Health Organization Country Office for Bangladesh, ; University of North Carolina at Chapel Hill Gillings School of Global Public Health, Department of Epidemiology<br>Zaman, MM; World Health Organization, Dhaka, Bangladesh, Moniruzzaman, Mohammad; Shiga University of Medical Science, Public Health<br>Ara Shakoor, Shawkat; National Institute of Ophthalmology<br>Hossain, A.H.M. Enayet; National Institute of Ophthalmology |
| <b>Primary Subject Heading</b>: | Epidemiology                                                                                                                                                                                                                                                                                                                                                                                                                                                  |
| Secondary Subject Heading:      | Cardiovascular medicine                                                                                                                                                                                                                                                                                                                                                                                                                                       |
| Keywords:                       | Cardiac Epidemiology < CARDIOLOGY, EPIDEMIOLOGY, Hypertension < CARDIOLOGY, Ischaemic heart disease < CARDIOLOGY, Myocardial infarction < CARDIOLOGY                                                                                                                                                                                                                                                                                                          |
|                                 |                                                                                                                                                                                                                                                                                                                                                                                                                                                               |

SCHOLARONE™  
Manuscripts



I, the Submitting Author has the right to grant and does grant on behalf of all authors of the Work (as defined in the below author licence), an exclusive licence and/or a non-exclusive licence for contributions from authors who are: i) UK Crown employees; ii) where BMJ has agreed a CC-BY licence shall apply, and/or iii) in accordance with the terms applicable for US Federal Government officers or employees acting as part of their official duties; on a worldwide, perpetual, irrevocable, royalty-free basis to BMJ Publishing Group Ltd ("BMJ") its licensees and where the relevant Journal is co-owned by BMJ to the co-owners of the Journal, to publish the Work in this journal and any other BMJ products and to exploit all rights, as set out in our [licence](#).

The Submitting Author accepts and understands that any supply made under these terms is made by BMJ to the Submitting Author unless you are acting as an employee on behalf of your employer or a postgraduate student of an affiliated institution which is paying any applicable article publishing charge ("APC") for Open Access articles. Where the Submitting Author wishes to make the Work available on an Open Access basis (and intends to pay the relevant APC), the terms of reuse of such Open Access shall be governed by a Creative Commons licence – details of these licences and which [Creative Commons](#) licence will apply to this Work are set out in our licence referred to above.

Other than as permitted in any relevant BMJ Author's Self Archiving Policies, I confirm this Work has not been accepted for publication elsewhere, is not being considered for publication elsewhere and does not duplicate material already published. I confirm all authors consent to publication of this Work and authorise the granting of this licence.



1  
2  
3 **Estimation of total cardiovascular risk using the 2019 WHO CVD prediction charts and**  
4 **comparison of population-level costs based on alternative drug therapy guidelines in Bangladesh: a**  
5 **population-based study of adults in Bangladesh**  
6  
7

8  
9 Running title: Total cardiovascular risk approach in Bangladesh

10  
11 Authors: Jessica Yasmine Islam<sup>1</sup>, M Mostafa Zaman<sup>2</sup>, Mohammad Moniruzzaman<sup>3</sup>, Shawkat Ara  
12 Shakoor<sup>4</sup>, A.H.M. Enayet Hossain<sup>4</sup>  
13

14  
15 Author Affiliations:

16  
17 <sup>1</sup>Department of Epidemiology, Gillings School of Global Public Health, University of North Carolina at  
18 Chapel Hill, North Carolina, USA  
19

20  
21 <sup>2</sup>Research and Publication Unit, World Health Organization, Dhaka, Bangladesh

22  
23 <sup>3</sup>Center for Epidemiologic Research in Asia, Shiga University of Medical Science, Otsu, Shiga, Japan

24  
25 <sup>4</sup>National Institute of Ophthalmology. Sher-e-Bangla Nagar, Dhaka, Bangladesh  
26  
27  
28

29  
30 Corresponding Author:

31 Dr. Jessica Yasmine Islam, PhD, MPH  
32 Department of Epidemiology  
33 UNC Gillings School of Global Public Health  
34 UNC Chapel Hill  
35 135 Dauer Drive  
36 Chapel Hill, NC 27599  
37 Email: [islamjy@email.unc.edu](mailto:islamjy@email.unc.edu)  
38  
39  
40  
41  
42  
43  
44  
45  
46  
47  
48  
49  
50  
51  
52  
53  
54  
55  
56  
57  
58  
59  
60

**Abstract**

Objective: The objective of this study is to estimate the population distribution of 10-year cardiovascular disease (CVD) risk among Bangladeshi adults aged 40 years and above, using the 2019 WHO CVD prediction charts. Additionally, we compared the cost of pharmacologic treatment of CVD based on CVD risk (thresholds  $\geq 30\%$ / $\geq 20\%$ ) to single risk factor (hypertension) cutoff levels in the Bangladeshi context.

Study Design: Cross-sectional, population-based study

Setting and Participants: From 2013-2014, we collected data from a nationally representative cross-sectional survey of adults aged  $\geq 40$  years from urban and rural areas of Bangladesh ( $n = 6189$ ). Using the 2019 World Health Organization risk prediction charts, CVD risk was calculated and categorized as very low ( $<5\%$ ), low ( $5-<10\%$ ), moderate ( $10-<20\%$ ), high ( $20-<30\%$ ), and very high risk ( $\geq 30\%$ ). We estimated drug therapy costs using the lowest price of each drug class available (aspirin, thiazide diuretics, statins, and angiotensin-converting enzyme inhibitors). We compared the total cost of drug therapy using the total risk vs. single risk factor approach.

Primary Outcome Measures: Our primary outcome was 10-year CVD risk categorized as very low ( $<5\%$ ), low ( $5-<10\%$ ), moderate ( $10-<20\%$ ), high ( $20-<30\%$ ), and very high risk ( $\geq 30\%$ ).

Results: The majority of adults (85.2%, 95% CI: 84.3–86.1) have a 10-year risk of CVD of less than 10%. The proportion of adults with a 10-year CVD risk of  $\geq 20\%$  was 0.51%. Only one adult was categorized with a 10-year CVD risk of  $\geq 30\%$ . Among adults with CVD risk groups of very low, low, and moderate, 17.4%, 27.9%, and 41.4% had hypertension (BP  $\geq 140/90$ ) and 0.1%, 1.7%, and 2.9% had severe

1  
2  
3 hypertension (BP $\geq$ 160/100), respectively. Using the total risk approach would reduce drug costs per  
4 million populations to \$144,540 (risk of  $\geq$  20%).  
5  
6  
7

8  
9 Conclusion: To reduce health care expenditure for the prevention and treatment of CVD, a total risk  
10 approach using the WHO/ISH risk prediction chart may lead to cost-savings.  
11  
12

13  
14  
15 **Keywords:** non-communicable diseases, Bangladesh, cardiovascular disease, pharmacologic  
16 intervention, cost, chronic disease  
17  
18  
19  
20  
21  
22  
23  
24  
25  
26  
27  
28  
29  
30  
31  
32  
33  
34  
35  
36  
37  
38  
39  
40  
41  
42  
43  
44  
45  
46  
47  
48  
49  
50  
51  
52  
53  
54  
55  
56  
57  
58  
59  
60

## Article Summary

### Strengths and Limitations of the Study

- Using the recently updated 2019 WHO CVD Risk Prediction Charts, this study provides evidence for incorporating the WHO/ISH CVD Risk Prediction Charts into CVD management and health care guidelines, and may lead to potential cost-savings from a societal perspective.
- The 2019 WHO/ISH CVD Risk Prediction Charts should be applied to a population who have not experienced a CVD event in the past, however, we were unable to confirm self-reported medical history of participants using medical charts or health records, leading to the potential for measurement error due to recall bias.
- The cost estimates we present are an underestimate of total costs for CVD-related treatment as the focus of this study is on cost of pharmacologic intervention only as the largest contributor to overall direct costs in Bangladesh.
- Although we present the total number of people estimated to require drug treatment using 2014 population data, we were unable to identify population estimates of only those at risk of their first CVD event due to lack of surveillance data.
- The CVD 10-year risk cut-offs were defined using risk prediction models derived from 85 cohorts mostly from high-income countries, as data from large-scale prospective cohort data from most low-income and middle-income countries (LMICs) are unavailable.

## Background

Globally, cardiovascular disease (CVD) is the leading cause of death and disproportionately impacts low- and middle-income countries (LMICs), where over 75% of CVD-related deaths occur (1). People living in LMICs are at high risk of developing CVDs due to the absence of integrated primary care for early detection and prevention of CVD-related risk factors, such as high cholesterol, high blood pressure, and smoking. Limited access to primary care and the growing burden of CVDs is a significant cause of poverty in LMICs and hinders the macroeconomic development of many countries(2). LMICs are estimated to experience cumulative economic losses exceeding 7 trillion US dollars over the next 15 years due to morbidity and mortality caused by noncommunicable diseases, including CVD(3). As such, the significance of the CVD epidemic has gained increasing international recognition over the past decade, leading to the development of several international guidelines for CVD control and prevention(4).

In 2007, the World Health Organization (WHO) published pocket guidelines, including CVD risk prediction charts, designed for health care workers in LMICs to guide patient 10-year risk stratification for heart attack or stroke(5). There are two possible strategies suitable for a low resource setting to assess the risk of a cardiovascular event and identify those at high risk of a fatal CVD outcome: 1. Utilize a single risk factor management strategy, which focuses on one condition at a time, such as hypertension; or, 2. Utilize a more holistic approach considering several risk factors such as age, tobacco use, gender, diabetes diagnosis, body mass index, blood pressure, and blood cholesterol when measured. Through the total risk approach, pocket guidelines help to identify high-risk patients that are in imminent danger of a heart attack or stroke for timely pharmacologic treatment or surgical interventions. Additionally, applying the total risk approach via the WHO prediction charts in a nationally representative sample provides an opportunity to estimate and monitor population-level distribution of CVD risk to ultimately inform CVD treatment policy recommendations (6, 7).

Currently, Bangladesh has not incorporated clinical guidelines for screening or treatment of risk factors based on absolute CVD risk scores and estimation of the population distribution of CVD risk over time. Data are needed to support the implementation of the WHO/ISH prediction charts as clinical

1  
2  
3 guidelines for Bangladesh, a resource-limited setting, to demonstrate the potential cost-savings and  
4 benefit of the WHO recommendation on CVD prevention. Recently in 2019, the World Health  
5 Organization updated the CVD risk charts based on newly validated risk prediction models to estimate  
6 CVD risk in 21 Global Burden of Disease regions(8). The newly developed risk predictions models have  
7 been calibrated using data from The Global Burden of Disease study to include estimates from low- and  
8 middle-income countries. To our knowledge, here we present the first analysis to apply the updated CVD  
9 risk charts among a cohort of Bangladeshi adults. Prior studies conducted in Bangladesh have estimated  
10 CVD risk among adults residing in rural areas only and have not included a nationally representative  
11 population (9-11). Additionally, no prior studies have estimated the potential costs of pharmacological  
12 treatment for CVD in Bangladesh using either the single risk factor or total risk approach, as done  
13 previously in other settings(7). As such, our objective was to assess the distribution of absolute CVD risk  
14 among a nationally representative sample of Bangladeshi adults using the 2019 WHO risk prediction  
15 chart recommended for the WHO South Asian Region (Bangladesh, Bhutan, India, Nepal, and Pakistan)  
16 We also compared the costs of drug treatments for CVD prevention using the total cardiovascular risk  
17 thresholds at  $\geq 20\%$  and with single risk factor cutoff levels (blood pressure  $\geq 140/90$  mm Hg).  
18  
19  
20  
21  
22  
23  
24  
25  
26  
27  
28  
29  
30  
31  
32  
33  
34  
35  
36

## 37 **Methods**

### 38 Study design and setting

39  
40  
41 Data were analyzed from a population-based cross-sectional study conducted from September to  
42 December 2013 to assess the burden of blindness and low vision among adults in Bangladesh. The target  
43 population of this survey included men and women residing in Bangladesh over the age of 40 years. The  
44 exclusion criteria included tourists and the institutionalized, such as residents of a military base, hospital,  
45 prisons, nursing homes, and other such institutions. We obtained ethical approval for this study from the  
46 Institutional Review Board of the National Institute of Ophthalmology. We provided participants with  
47 detailed information regarding the study objectives and procedures using a printed handout prepared in  
48  
49  
50  
51  
52  
53  
54  
55  
56  
57  
58  
59  
60

1  
2  
3 Bengali. Written consent was obtained from participants through signature or, if not possible, through  
4  
5 thumbprint.  
6  
7

### 8 9 Sampling Frame

10  
11 We adopted a multistage, geographically clustered, probability-based sampling approach to  
12  
13 obtain a nationally representative sample of Bangladesh, as previously described and outlined per the  
14  
15 WHO STEPwise approach (12-15). Population statistics were obtained using the 2011 national census  
16  
17 conducted by the Bangladesh Bureau of Statistics (BBS) to create the sample frame (16). The sampling  
18  
19 frame included 64,407 primary sampling units (PSUs) covering all seven divisions of the country. We  
20  
21 randomly selected seventy-two PSUs (25 urban and 47 rural) from seven divisions, with the probability of  
22  
23 selection proportional to the population size of each division. In each PSU, we selected 100 consecutive  
24  
25 households as the secondary sampling unit.  
26  
27

28  
29 For each household, a trained field data collector approached the head of the household or the  
30  
31 family member most knowledgeable of the residents to screen for eligible participants. The screening  
32  
33 respondent was asked to describe the composition of household residents, which was defined as those  
34  
35 who considered the home to be their primary place of residence as of the night before. A list was  
36  
37 composed and ordered from youngest to oldest age in years starting from 40 years. Using the list of  
38  
39 eligible residents, we used the Kish table approach to randomly select one participant from each home.  
40  
41 The selected participant was asked to come to a nearby health center the next day to administer the survey  
42  
43 by trained study interviewers and undergo a medical examination by the study physician. Based on the  
44  
45 medical review, participants were followed-up with by the providers at the health center for treatment.  
46  
47  
48

### 49 Patient and Public Involvement

50  
51 There was no patient or public involvement in the implementation of this study or interpretation  
52  
53 of analytic results.  
54  
55  
56  
57  
58

### Data Collection

To ensure effective and uniform data collection, field interviewers underwent a seven-day training on the interview methodology by the study ophthalmologists and epidemiologists. The training included an in-depth review of the survey content and protocol for completing the demographic questionnaire (a modified WHO/PBL Version III). Each member of the data collection team was provided a detailed survey protocol manual outlining the survey activities, the questionnaire interview, and information about the duties and responsibilities of all survey personnel.

Demographic data were collected, including age, sex, marital status, educational level, and occupation, using a structured questionnaire survey. Data regarding tobacco use, health history, and treatment history were also collected. Participants were asked if they smoked (e.g. cigarette, hookah, pipe) or if they used smokeless tobacco (e.g. chewing tobacco, jorda) to assess history of tobacco use. Each participant provided medical history for a prior diagnosis of high blood pressure or hypertension, diabetes, renal disease, or any cardiovascular diseases by a health care provider. Medication history was obtained including medication for high blood pressure, diabetes, malaria, steroids, tuberculosis, and among women, history of oral contraception. The questionnaire was translated from English to Bengali, adapted, and validated before data collection.

Physical measurements, including height, weight, and blood pressure (BP) were collected. Trained field interviewers measured BP using an appropriately calibrated aneroid sphygmomanometer with appropriately sized arm cuffs. BP measurements were consistently taken on the right arm at heart level and elbow-assisted while the participant was seated. The initial measurement was performed after five minutes of rest. After two minutes, the second measurement was taken. The mean of these two BP readings was utilized as the final BP for each participant. To measure blood glucose levels, we obtained random blood glucose samples (17). Capillary blood samples were consistently taken using the right arm and index finger with a glucometer (Accu-chek Advantage, Roche Diagnostics Division, Grenzachstrasse, Switzerland).



### Estimation of 10-year CVD risk

We estimated 10-year CVD risk using the 2019 WHO CVD risk prediction charts(8, 18). The prediction charts provide the 10-year risk of a fatal or non-fatal major cardiovascular event, such as myocardial infarction or stroke, based on age, sex, blood pressure, body mass index, smoking status, total blood cholesterol, and the presence or absence of diabetes mellitus for 14 WHO epidemiological sub-regions. For each region, two sets of charts have been developed based on the availability of laboratory-based results. As total cholesterol was not measured in our cohort, we utilized the WHO cardiovascular disease risk non-laboratory-based charts developed for South Asia (including, Bangladesh, Bhutan, India, Nepal, and Pakistan). The non-laboratory-based risk charts do not account for diabetes diagnosis or total cholesterol level.

The prediction chart grades cardiovascular risk using the following categories: age (1: 40–44years; 2: 45-49 years; 3: 50-54 years; 4: 55-59 years; 5: 60-64 years; 6: 64-69 years; 7: 70-74 years), sex (men and women), smoking (smoker or non-smoker), systolic blood pressure (<120 mmHg, 120 to 139, 140 to 159, 160 - <180, and  $\geq 180$ ), and body mass index (<20, 20-24, 25-29, 30-35, and  $\geq 35$ ). The risk categories for 10-year combined acute myocardial infarction and stroke (fatal and non-fatal) are as follows: <5%, 5-<10%, 10 - <20%, 20 to <30%, and  $\geq 30\%$ .

Observations with missing values were dropped from the analysis. We did not anticipate any bias from the complete-case analysis approach as the number of missing observations for key variables was less than 2%: smoking status, n=18 or 0.3% missing values; systolic blood pressure, n = 22 or 0.4% missing values; diastolic blood pressure, n = 25 or 0.4% missing values; and body mass index, n=30 or 0.5%,

### Data Analysis

We present sociodemographic variables using mean (standard deviation) or the median (interquartile range) for continuous variables and proportion for categorical variables. We conducted bivariate analyses by sex and age group. We used the chi-square test to assess for any significant

1  
2  
3 differences in CVD risk distribution across sex. For estimating the cost of medicines per million per year  
4 (population aged 40 years or older), we used the lowest price of each drug class available in the market  
5 (generic preparation of aspirin, thiazide diuretics, statins, and angiotensin-converting enzyme inhibitors).  
6  
7 Appendix 1 includes further details regarding the specific costs of common drugs used to treat  
8  
9  
10  
11  
12 cardiovascular disease in Bangladesh.

13  
14 To calculate costs we included the following categories: (1) people with high cardiovascular risk  
15 ( $\geq 20\%$  and  $BP \geq 160/100$ ), who are recommended for pharmacological intervention using four different  
16 types of drugs for treatment<sup>(5, 7)</sup>; and (2) people with  $BP \geq 140/90$ , who are recommended  
17  
18 antihypertensive treatment. To calculate the estimated annual total cost of CVD medication treatment per  
19  
20 million populations (aged 40 years or older), we multiplied the percentage of the population at risk and  
21  
22 the price of medicine in Bangladesh. We included an estimate of the total number of people estimated to  
23  
24 require drug treatment as follows: we multiplied the prevalence of the population requiring medication  
25  
26 based on each approach based on our study estimates, by the number of people in the general population  
27  
28 in 2013 (19) stratified by gender and age group.  
29  
30  
31  
32  
33  
34

## 35 **Results**

### 36 Demographic Characteristics

37  
38  
39 The mean age of included participants was 52.9 years (men: 53.5 years, women: 52.5 years)  
40 (Table 1). The average level of educational attainment was 3.1 years of education; women were generally  
41 less educated than men (2.1 years vs. 4.3 years, respectively). The majority (80%) of women were  
42  
43 housewives, and among men, the most common occupation was an industrial worker or day laborer  
44  
45 (51.2%). Overall, over one-third of participants ever used smoking tobacco, and over half ever used  
46  
47 smokeless tobacco. Few participants drank alcohol in the past 30 days (1.2%). The mean BMI was 21.9  
48  
49  $kg/m^2$  and the mean waist circumference was 82.4 cm.  
50  
51  
52

53  
54 Overall, the prevalence of hypertension (defined as  $BP \geq 140/90$ ) increased with age among men  
55  
56 and women. Additionally, women had higher prevalence of hypertension among nearly all age-groups in  
57  
58

1  
2  
3 both urban and rural areas. Prevalence of hyperglycemia (glucose  $\geq 11.1$  mmol/L) was higher among  
4 urban adults compared to rural across all age groups. The highest prevalence of hyperglycemia was  
5 observed among urban men aged 60-69 years at 18.2%. Finally, the prevalence of overweight and obesity  
6 was higher among urban residents than rural residents. The largest prevalence of overweight and obesity  
7 were observed among urban women, with prevalence as high as 51.4% among women aged 40-49 years  
8 (Figure 1).  
9  
10  
11  
12  
13  
14

### 15 16 17 18 Distribution of Cardiovascular Risk

19  
20 We summarized the distribution of cardiovascular risk in the population overall and stratified by  
21 sex in Table 2. Eighty-five percent of participants had a low ( $< 10\%$ ) 10-year cardiovascular risk, and  
22 this proportion was significantly different across sex ( $p < 0.001$ ). Over half (63.7%) of women had a very  
23 low ( $< 5\%$ ) cardiovascular risk. Almost all (99.5%) of the study population were categorized as having  
24 cardiovascular risk  $< 20\%$ . A higher proportion of men (1.0%) were categorized as high risk than women  
25 (0.1%) ( $p = < 0.001$ ). Overall, only one male participant was categorized as very high risk or with a  
26 cardiovascular risk of  $\geq 30\%$ .  
27  
28  
29  
30  
31  
32  
33

34 We summarized the prevalence of adults with hypertension by CVD risk group (Figure 2).  
35 Among those with 10- $< 20\%$  CVD risk, we observed a high proportion of hypertensive (41.4%). In the  
36 high risk group ( $\geq 20\%$ ), 100% had hypertension. Additionally, among those with  $\geq 20\%$  CVD risk, we  
37 observed that 35% had severe hypertension (BP  $\geq 160/100$ ).  
38  
39  
40  
41  
42  
43  
44

### 45 Cost of Drug Treatment

46  
47 We were unable to compare costs of drug treatment at two cardiovascular risk thresholds (30% to  
48 20%) due to only one male adult with a CVD risk at  $\geq 30\%$ . We observed low proportion of adults with  
49 CVD risk  $\geq 20\%$  at 0.5%. When we included BP  $\geq 160/100$  measurements, the number of people requiring  
50 treatment more than tripled from 0.5% to 1.8% (Table 3). Conversely, if a single risk factor approach was  
51 applied, and all those with hypertension (a persistent SBP  $\geq 140$  and/or DBP  $\geq 90$ ) were treated, 24.6% of  
52  
53  
54  
55  
56  
57  
58  
59  
60

1  
2  
3 the sample would require drug treatment, specifically antihypertensive; more than 20 times the proportion  
4 identified when using the total cardiovascular risk approach alone.  
5  
6  
7  
8

### 9 Comparison of Cost by Approach

10  
11 Next, we compared the estimated annual cost of medicines per million populations for  
12 implementing the total risk approach vs. the single risk factor approach. Table 4 shows the estimated  
13 number of people aged 40 years or older requiring drug treatment stratified by age group and gender. The  
14 estimates showed that if the single risk factor approach is applied in Bangladesh with its percentage of  
15 population at risk and the lowest price of medicine in the country, the cost per million populations (aged  
16 40 years or older) of treating those with  $BP \geq 140/90$  would be \$7,111,368 US\$; if the absolute risk  
17 approach were applied, the cost of treating those with 10-year risk of  $CVD \geq 20\%$  per million populations  
18 (aged 40 years or older) would be \$144,540, almost fifty times less (Figure 3). The cost estimation was  
19 based on the percentage of the population at different levels of risk and the differences in the price of  
20 generic medicines. For this analysis, we focused on the cost of pharmacological treatment as it is the most  
21 critical contributor to the overall direct costs of CVD treatment in Bangladesh. We assumed that other  
22 costs of CVD treatment and prevention service delivery, such as health facilities and wages of health  
23 workers, are similar for both approaches of service delivery(7).  
24  
25  
26  
27  
28  
29  
30  
31  
32  
33  
34  
35  
36  
37  
38  
39  
40

### 41 **Discussion**

42  
43 Using this nationally representative survey of Bangladeshi adults aged 40 years and above, we  
44 found that the majority of adults (97%) were at a very low, low or moderate ten-year risk of myocardial  
45 infarction and stroke. The proportion of adults requiring drug treatment rose from 1.0% to 2.1% when the  
46 threshold for pharmacologic intervention was changed from  $\geq 20\%$  only to  $\geq 20\%$  and blood pressure of  
47 160/100, respectively; which was lower the proportion than the single risk factor approach (24.6%). Our  
48 data demonstrated that using a single risk factor approach to manage individual cardiovascular risk factors  
49 is costlier (\$7,111,368 per million population) than using the total risk approach ( $CVD$  risk  $\geq 20$ , \$144,540  
50  
51  
52  
53  
54  
55  
56  
57  
58  
59  
60

1  
2  
3 per million population), as a more substantial proportion of adults will need drug treatment. Findings  
4  
5 from this analysis support the implementation of clinical guidelines using CVD risk scores calculated  
6  
7 using the WHO/ISH prediction charts to appropriately identify patients at highest risk of CVD  
8  
9 development over ten years in Bangladesh.  
10

11  
12 In our study using nationally representative data, we found that the 10-year risk of CVD was low  
13 (<10%) among the vast majority of adults (85.1%). Additionally, only 0.5% of adults were at high risk ( $\geq$   
14 20%) of a CVD event within the next ten years. In this analysis, we applied the 2019 CVD Risk Charts  
15  
16 for South Asia, which are newly developed and now incorporate body mass index as part of the prediction  
17  
18 chart algorithm. Our results are comparable to data from South Asia presented in the 2019 Lancet  
19  
20 publication by the WHO CVD Risk Chart Working Group, which showed that 0% of women from both  
21  
22 Bhutan and Nepal had a CVD risk level above 20%. Similarly, 0% of men from Bhutan, and only <2% of  
23  
24 men from Nepal were categorized with a risk level above 20%(8). These data demonstrate a lower  
25  
26 prevalence of CVD risk  $\geq$ 20% than prior reports from South Asia, which utilized the original risk  
27  
28 prediction charts published in 2007. For example, prior data from Nepal showed that 4.3% of adults were  
29  
30 categorized with a high ( $\geq$ 20%) 10-year risk of a CVD event(20). Further, analyses from a rural area of  
31  
32 south India revealed that seventeen percent of participants had moderate to high risk (10->20%) of  
33  
34 cardiovascular events per the 2007 WHO prediction charts(21). Finally, data collected in 2010 from  
35  
36 Pakistan showed that 10% of adults were categorized with  $\geq$ 20% CVD risk, with 2.9% as high as  
37  
38  $\geq$ 40%(7). When utilizing the 2019 WHO prediction charts on the population level to measure and monitor  
39  
40 trends in total CVD risk in recent years, policy makers should interpret the trends with caution, and  
41  
42 potentially compare changes in trends of CVD-risk using the criteria of both the 2007 and 2019 WHO  
43  
44 risk prediction charts.  
45  
46  
47  
48

49  
50 Our data demonstrate a similar drop in proportion of adults with a CVD risk  $\geq$ 20% as observed in  
51  
52 other South Asian countries when the 2019 risk prediction charts are applied. Utilizing the 2007  
53  
54 prediction charts, two prior studies have reported absolute CVD risk among the Bangladeshi population  
55  
56 (10, 22). When using the prior version of the 2007 WHO risk prediction charts Fatema et al. found that  
57  
58  
59

1  
2  
3 10% of Bangladeshi adults living in rural areas were at high risk ( $\geq 20\%$ ) of a CVD event within the next  
4  
5 ten years, and half of these adults fell in the very high-risk category ( $\geq 30\%$ ). These proportions were the  
6  
7 same when total cholesterol was incorporated in the WHO/ISH CVD Risk-Assessment Tool.

8  
9 Unfortunately, we were unable to measure total blood cholesterol and were unable to make similar  
10  
11 comparisons. In another rural Bangladeshi population, the proportion of participants at a high-risk ( $\geq$   
12  
13 20%) of a CVD event in 10 years was 2.1%, which is closer in proportion to our finding(22). No other  
14  
15 studies in Bangladesh have been conducted to assess the 10-year risk of CVD using the WHO/ISH tool.  
16  
17 We present novel data using the 2019 WHO risk prediction charts and a nationally representative sample,  
18  
19 which may be generalizable to the population of Bangladesh. Data we present may be used to inform  
20  
21 policymakers decisions on clinical guidelines and resource allocation for treatment of CVDs in  
22  
23 Bangladesh.

24  
25  
26 Similar to prior analyses conducted using data from eight low- and middle-income countries(7),  
27  
28 our results demonstrate that in the Bangladeshi context using a single risk factor approach to evaluate risk  
29  
30 of CVD-related mortality would cost more than implementing the total risk approach due to higher drug  
31  
32 costs. In Bangladesh, about 60% of out-of-pocket expenditure patients face goes towards drugs directly  
33  
34 bought from pharmacies, diagnostics, and informal providers(23). Additionally, patients in Bangladesh  
35  
36 experience a high level of uncertainty regarding out-of-pocket costs due to unforeseen costs on  
37  
38 diagnostics and medications, including under-the-table payments to providers for reliable and timely  
39  
40 services(24). Currently, Bangladesh does not offer universal health coverage or affordable health  
41  
42 insurance plans. The cost of treatment for CVD frequently leads to catastrophic health expenditure and  
43  
44 impoverishment; the proportion of catastrophic spending for treatment is highest among those from the  
45  
46 lowest quintiles of wealth (14%) compared to those with high wealth and high socioeconomic status  
47  
48 (6.6%) (25). As such, implementing the WHO risk prediction charts may be beneficial to patients in  
49  
50 Bangladesh as only those at highest risk of future CVD would be recommended for life-saving treatment.

51  
52  
53 In addition to benefits to the patient, implementing the total risk approach would also be  
54  
55 beneficial to the health care system in Bangladesh by improving NCD preventive service delivery and the  
56  
57

1  
2  
3 use of guidelines for adequate care. Currently, Bangladesh is categorized by the World Bank as a lower-  
4 middle-income country with emerging health challenges as the burden of NCDs continues to grow. In  
5 2015, an estimated 67% of all deaths in Bangladesh were due to NCDs and the risk of premature death  
6 from chronic disease among adults aged 30-70 years was 22%(26). Indeed, CVDs and circulatory  
7 diseases are the leading cause of mortality and morbidity in Bangladesh. Despite this substantial burden,  
8 preventive services for CVDs in Bangladesh are limited. In 2014, an estimated 16% of health care  
9 facilities across the country (i.e. hospitals, community clinics) had the resources to diagnose, prescribe  
10 treatment for, and manage patients with CVDs(27). District hospitals (95%) and upazila health  
11 complexes (81%), and private hospitals (77%) were more likely to provide services for cardiovascular  
12 diseases than other facilities. Only 10% of community clinics and maternal and child welfare centers, and  
13 17% of union level facilities, which are the most accessible providers in rural areas, provided any  
14 cardiovascular services, and the services at these facilities were limited to the measurement of blood  
15 pressure or referrals(27). Among facilities with the capacity to offer services for CVD management, about  
16 only 20% utilized established guidelines for hypertension treatment and less than one-third had essential  
17 CVD medicines readily available on-site for patients(27). By integrating the WHO risk prediction charts  
18 into the national guidelines for management of hypertension and CVD prevention in Bangladesh, the  
19 proportion of facilities using established guidelines may increase as the charts are easy to implement,  
20 interpret, and access. Additionally, since only one-third of facilities have essential CVD medicines readily  
21 available, distributing pharmacologic treatment to those at highest risk of premature mortality due to  
22 CVD will be crucial.

23  
24  
25  
26  
27  
28  
29  
30  
31  
32  
33  
34  
35  
36  
37  
38  
39  
40  
41  
42  
43  
44  
45 Although implementation of a total risk approach may lead to cost-savings, the WHO prediction  
46 charts may underestimate CVD risk in certain categories of people such as those with persistent raised  
47 blood pressure  $\geq 160/100$  mmHg, blood cholesterol  $\geq 8$  mmol/L, or those suffering from diabetes with  
48 renal disease(5). Patients who may fall in these categories should be recommended for intensive lifestyle  
49 interventions, and appropriate drug therapy. In fact, the risk models used to develop the 2019 CVD risk  
50 charts may have underestimated CVD risk due to limitations in the population data used to estimate  
51  
52  
53  
54  
55  
56  
57  
58  
59  
60

1  
2  
3 incidences: As reported in the 2019 Lancet publication by the WHO CVD Risk Chart Working Group the  
4 data used to develop the predictions models likely included people already on cardiovascular disease  
5 prevention therapies, such as statins, which have led to an underestimate in CVD risk(8). In our study, we  
6 underscore the potential for underestimation of CVD risk by comparing the proportion of adults  
7 categorized as high risk ( $\geq 20\%$  CVD risk) to those who would be diagnosed with hypertension (BP  $\geq$   
8 140/60) and severe hypertension (BP  $\geq 160/100$ ). Additionally, we provided a graphical summary of  
9 common risk factors of CVD, including hypertension, hyperglycemia, and overweight and obesity.  
10  
11 Despite our very low proportion of adults who would be recommended for treatment based on the risk  
12 prediction charts, we observed a high prevalence of these risk factors particularly in urban populations.  
13  
14  
15  
16  
17  
18  
19  
20  
21

22 Limitations of this analytic approach should be considered when interpreting our results. The  
23 CVD 10-year risk cut-offs were defined using risk prediction models derived from 85 cohorts mostly  
24 from high-income countries, as data from large-scale prospective cohort data from most low-income and  
25 middle-income countries (LMICs) are unavailable. Data were used from the Global Burden of Disease  
26 project to recalibrate the models to be representative of LMICs, however, the GBD data do not have  
27 country-specific disease risk estimates. As such, the estimation used from each region's chart will most  
28 likely apply to the largest country within each region, or from the country where most of the data  
29 originated. The risk prediction he charts provide approximate estimates of CVD risk in people who do not  
30 have established coronary heart disease, stroke or other atherosclerotic diseases. Although we included  
31 simvastatin in our pharmacologic cost analysis, we were unable to measure total cholesterol or confirm  
32 the medical history of participants using medical charts and relied on self-report, leading to the potential  
33 for measurement error and recall bias. Further, our data were collected in 2013 and may be outdated as  
34 population growth in older age groups has been observed in recent years. Our analyses should be  
35 replicated using more recent data and future research studies should include the measurement of total  
36 cholesterol. Finally, our cost estimates were based on the prevalence of each risk approach in our study  
37 sample. Although we present the total number of people estimated to require drug treatment using 2013  
38 population data, estimates of only those at risk of their first CVD event were unavailable due to lack of  
39  
40  
41  
42  
43  
44  
45  
46  
47  
48  
49  
50  
51  
52  
53  
54  
55  
56  
57  
58  
59  
60



1  
2  
3 surveillance data. Nevertheless, our data are valuable as the first analysis to apply the 2019 WHO CVD  
4 risk prediction charts to a cohort of adults in Bangladesh. Additionally, we provide data on the  
5 comparative cost difference of each approach to underscore the potential cost savings in implementing the  
6 total risk approach in Bangladesh. Cost data presented in this analysis may be used in future cost-  
7 effectiveness analyses to compare the total risk and single risk factor approach when considering all costs  
8 from a societal perspective to inform health policy in Bangladesh.  
9  
10  
11  
12  
13  
14

15  
16 The World Health Organization has outlined global targets in the Global Monitoring Framework  
17 for the control of NCDs in LMICs, which prioritizes an 80% of availability of affordable basic  
18 technologies and essential medicines necessary to treat significant NCDs, including CVDs in both rural  
19 and urban areas of the country. Limited CVD treatment access and weak health care infrastructure in  
20 Bangladesh is a significant public health concern. As public financing for health care is limited in  
21 Bangladesh (~1% of gross domestic product or GDP), public health policies on CVD drug treatment  
22 guidelines based on cost estimates, such as out-of-pocket costs is necessary for effective CVD control.  
23 Effective policies should address the potential for overtreatment, which comes at a high cost to both the  
24 health care system and the patient. The high percentage of the Bangladeshi adult population at low 10-  
25 year CVD risk (<10%) highlights the potential for reduction of CVD risk through population-wide public  
26 health policy and availability of accessible preventive services. However, caution should be taken to  
27 ensure that risk stratification approaches are not used in inappropriate clinical circumstances, such as  
28 adults with highly uncontrolled hypertension with blood pressure measurements at 160/100 mmHg.  
29  
30  
31  
32  
33  
34  
35  
36  
37  
38  
39  
40  
41  
42  
43  
44

## 45 **Conclusion**

46  
47 Our data show that the implementation of a total risk approach compared with a single risk factor  
48 approach will reduce the health care expenditure by lowering drug costs, which accounts for 60% of out-  
49 of-pocket spending in Bangladesh. This approach would be particularly beneficial in Bangladesh, a low-  
50 resource country that should prioritize the development of health policy for effective resource allocation  
51 in the public health sector. Using the total risk approach would increase service coverage and allow for  
52  
53  
54  
55  
56  
57  
58  
59  
60

1  
2  
3 the distribution of resources to target those at highest risk of experiencing a heart attack or stroke. As the  
4 majority of the Bangladeshi adult population aged  $\geq 40$  years have a low ten-year risk of CVD, strategies  
5 that target those at highest risk of CVD coupled with public health policies to reduce the population-level  
6 risk of CVD may be effective.  
7  
8  
9  
10  
11  
12  
13  
14  
15  
16  
17  
18  
19  
20  
21  
22  
23  
24  
25  
26  
27  
28  
29  
30  
31  
32  
33  
34  
35  
36  
37  
38  
39  
40  
41  
42  
43  
44  
45  
46  
47  
48  
49  
50  
51  
52  
53  
54  
55  
56  
57  
58  
59  
60

For peer review only

## Footnotes

Acknowledgments: The study was completed by the National Institute of Ophthalmology (NIO) of Bangladesh with technical assistance from the WHO Country Office for Bangladesh. The authors are grateful to the management and field team of NIO consisting of ophthalmologists, other doctors, nurses, technologists, and enumerators for their hard works.

Competing Interests: The authors of this study declare no conflict of interest. The authors alone are responsible for the views expressed in this article and they do not necessarily represent the views, decisions or policies of the institutions with which they are affiliated.

Funding: Financial assistance for this study was provided by the WHO Country Office for Bangladesh (WHO Reference: 2013/355662-0, Purchase Order: 200843353, Reg. File: BAN-2013-B7-TSA-0001)

Consent to publish: All authors consent to the publication of this manuscript.

Availability of data and materials: The de-identified participant data used and/or analyzed during the current study are available from the corresponding author on reasonable request. Please contact M. Mostafa Zaman at zamanm@who.int for further information and guidelines.

Authors contributions: JYI: conceptualized the manuscript, analyzed data, interpreted results critically, and drafted the manuscript. MMZ: conceptualized the manuscript, designed the study, interpreted results critically, guided manuscript writing, and critically reviewed it. MM, SAS, AHMEH prepared the survey protocol, trained the field team, implemented the survey, processed the data, and reviewed the manuscript. SAS is the guarantor of data.

**Figures:**

Figure 1: Prevalence of hypertension, hyperglycemia, and overweight and obesity among Bangladeshi adults aged 40 years and above by area of residence and age group

Figure 2: Proportion of adults with hypertension or severe hypertension by CVD risk group

Figure 3: Annual costs of pharmacologic treatment for CVD by sex and risk stratification approach

For peer review only

## References

1. Checkley W, Ghannem H, Irazola V, Kimaiyo S, Levitt NS, Miranda JJ, et al. Management of NCD in low- and middle-income countries. *Global heart*. 2014;9(4):431-43. doi: 10.1016/j.ghart.2014.11.003. PubMed PMID: 25592798; PubMed Central PMCID: PMC4299752.
2. Islam SM, Purnat TD, Phuong NT, Mwingira U, Schacht K, Froschl G. Non-communicable diseases (NCDs) in developing countries: a symposium report. *Globalization and health*. 2014;10:81. doi: 10.1186/s12992-014-0081-9. PubMed PMID: 25498459; PubMed Central PMCID: PMC4267750.
3. Global action plan for the prevention and control of noncommunicable diseases 2013-2020. Geneva, Switzerland: World Health Organization; 2013 [cited 2019 01/10]. Available from: [http://apps.who.int/iris/bitstream/10665/94384/1/9789241506236\\_eng.pdf?ua=1](http://apps.who.int/iris/bitstream/10665/94384/1/9789241506236_eng.pdf?ua=1).
4. NCD Global Monitoring Framework: World Health Organization; 2017 [cited 2017 09/29]. Available from: [http://www.who.int/nmh/global\\_monitoring\\_framework/en/](http://www.who.int/nmh/global_monitoring_framework/en/).
5. Prevention of cardiovascular disease: pocket guidelines for assessment and management of cardiovascular disease Geneva: World Health Organization, 2007.
6. Ndindjock R, Gedeon J, Mendis S, Paccaud F, Bovet P. Potential impact of single-risk-factor versus total risk management for the prevention of cardiovascular events in Seychelles. *Bulletin of the World Health Organization*. 2011;89(4):286-95. doi: 10.2471/BLT.10.082370. PubMed PMID: 21479093; PubMed Central PMCID: PMC4267750.
7. Mendis S, Lindholm LH, Anderson SG, Alwan A, Koju R, Onwubere BJ, et al. Total cardiovascular risk approach to improve efficiency of cardiovascular prevention in resource constrain settings. *Journal of clinical epidemiology*. 2011;64(12):1451-62. doi: 10.1016/j.jclinepi.2011.02.001. PubMed PMID: 21530172.

- 1  
2  
3 8. Group WCRCW. World Health Organization cardiovascular disease risk charts: revised models  
4 to estimate risk in 21 global regions. *The Lancet Global health*. 2019;7(10):e1332-e45. doi:  
5 10.1016/S2214-109X(19)30318-3. PubMed PMID: 31488387.  
6  
7  
8  
9  
10 9. Fatema K, Zwar NA, Milton AH, Rahman B, Awal AS, Ali L. Cardiovascular risk assessment  
11 among rural population: findings from a cohort study in a peripheral region of Bangladesh. *Public health*.  
12 2016;137:73-80. doi: 10.1016/j.puhe.2016.02.016. PubMed PMID: 27036981.  
13  
14  
15  
16  
17 10. Fatema K, Zwar NA, Milton AH, Rahman B, Ali L. Application of two versions of the  
18 WHO/international society of hypertension absolute cardiovascular risk assessment tools in a rural  
19 Bangladeshi population. *BMJ open*. 2015;5(10):e008140. doi: 10.1136/bmjopen-2015-008140. PubMed  
20 PMID: 26463220; PubMed Central PMCID: PMC4606419.  
21  
22  
23  
24  
25  
26  
27 11. Fatema K, Rahman B, Zwar NA, Milton AH, Ali L. Short-term predictive ability of selected  
28 cardiovascular risk prediction models in a rural Bangladeshi population: a case-cohort study. *BMC*  
29 *cardiovascular disorders*. 2016;16(1):105. doi: 10.1186/s12872-016-0279-2. PubMed PMID: 27386836;  
30 PubMed Central PMCID: PMC4937534.  
31  
32  
33  
34  
35  
36  
37 12. Zaman MM, Rahman MM, Rahman MR, Bhuiyan MR, Karim MN, Chowdhury MA. Prevalence  
38 of risk factors for non-communicable diseases in Bangladesh: Results from STEPS survey 2010. *Indian*  
39 *journal of public health*. 2016;60(1):17-25. doi: 10.4103/0019-557X.177290. PubMed PMID: 26911213;  
40 PubMed Central PMCID: PMC49138.  
41  
42  
43  
44  
45  
46 13. Rahman M, Zaman MM, Islam JY, Chowdhury J, Ahsan HN, Rahman R, et al. Prevalence,  
47 treatment patterns, and risk factors of hypertension and pre-hypertension among Bangladeshi adults.  
48 *Journal of human hypertension*. 2018;32(5):334-48. doi: 10.1038/s41371-017-0018-x. PubMed PMID:  
49 29230005; PubMed Central PMCID: PMC5860750.  
50  
51  
52  
53  
54  
55  
56  
57  
58  
59  
60

- 1  
2  
3 14. Karim MN, Zaman MM, Rahman MM, Chowdhury MAJ, Ahsan H, Hassan MM, et al.  
4  
5 Sociodemographic Determinants of Low Fruit and Vegetable Consumption Among Bangladeshi Adults:  
6  
7 Results From WHO-STEPs Survey 2010. *Asia-Pacific journal of public health / Asia-Pacific Academic*  
8  
9 Consortium for Public Health. 2017;29(3):189-98. doi: 10.1177/1010539517699059. PubMed PMID:  
10  
11 28434246; PubMed Central PMCID: PMC6349139.  
12  
13  
14  
15 15. Surveillance of risk factors for noncommunicable disease: the WHO STEPwise approach.  
16  
17 Geneva: World Health Organization, 2001.  
18  
19  
20 16. Population and Housing Census 2001, updated in 2009 Dhaka, Bangladesh: Bangladesh Bureau  
21  
22 of Statistics 2009 [cited 2019 01/10]. Available from:  
23  
24 <http://microdata.worldbank.org/index.php/catalog/1616>.  
25  
26  
27 17. Global report on diabetes Geneva, Switzerland: World Health Organization 2016. Available  
28  
29 from: <https://www.who.int/diabetes/global-report/en/>.  
30  
31  
32 18. Mendis S, Lindholm LH, Mancia G, Whitworth J, Alderman M, Lim S, et al. World Health  
33  
34 Organization (WHO) and International Society of Hypertension (ISH) risk prediction charts: assessment  
35  
36 of cardiovascular risk for prevention and control of cardiovascular disease in low and middle-income  
37  
38 countries. *Journal of hypertension*. 2007;25(8):1578-82. doi: 10.1097/HJH.0b013e3282861fd3. PubMed  
39  
40 PMID: 17620952.  
41  
42  
43  
44 19. Population Projection of Bangladesh Dynamics and Trends 2011-2061 Dhaka, Bangladesh  
45  
46 Bangladesh Bureau of Statistics 2015 [cited 2018 11/17]. Available from:  
47  
48 [http://203.112.218.65:8008/WebTestApplication/userfiles/Image/PopMonographs/PopulationProjection.p](http://203.112.218.65:8008/WebTestApplication/userfiles/Image/PopMonographs/PopulationProjection.pdf)  
49  
50 [df](http://203.112.218.65:8008/WebTestApplication/userfiles/Image/PopMonographs/PopulationProjection.pdf).  
51  
52  
53 20. Khanal MK, Ahmed MS, Moniruzzaman M, Banik PC, Dhungana RR, Bhandari P, et al. Total  
54  
55 cardiovascular risk for next 10 years among rural population of Nepal using WHO/ISH risk prediction  
56  
57  
58  
59  
60

1  
2  
3 chart. BMC research notes. 2017;10(1):120. doi: 10.1186/s13104-017-2436-9. PubMed PMID:  
4 28270186; PubMed Central PMCID: PMC5341399.  
5  
6  
7

8 21. Ghorpade AG, Shrivastava SR, Kar SS, Sarkar S, Majgi SM, Roy G. Estimation of the  
9 cardiovascular risk using World Health Organization/International Society of Hypertension (WHO/ISH)  
10 risk prediction charts in a rural population of South India. Int J Health Policy Manag. 2015;4(8):531-6.  
11  
12 doi: 10.15171/ijhpm.2015.88. PubMed PMID: 26340393; PubMed Central PMCID: PMC4529043.  
13  
14  
15

16 22. Cravedi P, Sharma SK, Bravo RF, Islam N, Tchokhanelidze I, Ghimire M, et al. Preventing renal  
17 and cardiovascular risk by renal function assessment: insights from a cross-sectional study in low-income  
18 countries and the USA. BMJ open. 2012;2(5). doi: 10.1136/bmjopen-2012-001357. PubMed PMID:  
19 23002161; PubMed Central PMCID: PMC3467605.  
20  
21  
22  
23  
24  
25

26 23. Multisectoral Action Plan for the Noncommunicable Disease Control and Prevention (2016-  
27 2021) Dhaka, Bangladesh: Ministry of Health and Family Welfare, Government of the People's Republic  
28 Bangladesh.; 2015 [cited 2018 12/15]. Available from:  
29  
30  
31  
32  
33 [http://www.searo.who.int/entity/ncd\\_tobacco\\_surveillance/monitoring\\_fw/pages\\_from\\_ban\\_ncd\\_action\\_p](http://www.searo.who.int/entity/ncd_tobacco_surveillance/monitoring_fw/pages_from_ban_ncd_action_p)  
34  
35  
36 [lan\\_2016\\_2021\\_me\\_not\\_approved.pdf](lan_2016_2021_me_not_approved.pdf).  
37  
38

39 24. Non Communicable Diseases in Bangladesh: Current Scenario and Future Directions Dhaka,  
40 Bangladesh2017 [cited 2019 05/10]. Available from:  
41  
42  
43 [http://www.brac.net/images/news/2017/bhw\\_report2016\\_final.pdf](http://www.brac.net/images/news/2017/bhw_report2016_final.pdf).  
44  
45

46 25. Health and Morbidity Status Survey-2012 Dhaka, Bangladesh: Bangladesh Bureau of Statistics,  
47 Ministry of Planning.; 2013 [cited 2018 12/25]. Available from:  
48  
49  
50 [http://bbs.portal.gov.bd/sites/default/files/files/bbs.portal.gov.bd/page/4c7eb0f0\\_e780\\_4686\\_b546\\_b4fa0](http://bbs.portal.gov.bd/sites/default/files/files/bbs.portal.gov.bd/page/4c7eb0f0_e780_4686_b546_b4fa0)  
51  
52  
53 <a8889a5/HMSS.pdf>.  
54  
55  
56  
57  
58  
59  
60



- 1  
2  
3 26. Noncommunicable Diseases Progress Monitor 2017 Geneva, Switzerland: World Health  
4 Organization; 2017 [cited 2019 02/15]. 231]. Available from: [https://www.who.int/nmh/publications/ncd-](https://www.who.int/nmh/publications/ncd-progress-monitor-2017/en/)  
5 [progress-monitor-2017/en/](https://www.who.int/nmh/publications/ncd-progress-monitor-2017/en/).  
6  
7  
8  
9  
10 27. NIPORT. Bangladesh Health Facility Survey 2014 Dhaka, Bangladesh: National Institute of  
11 Population Research and Training (NIPORT), Associates for Community and Population Research  
12 (ACPR), and ICF International. ; 2016 [cited 2019 03/15]. Available from:  
13 <https://dhsprogram.com/pubs/pdf/SPA23/SPA23.pdf>.  
14  
15  
16  
17  
18  
19  
20  
21  
22  
23  
24  
25  
26  
27  
28  
29  
30  
31  
32  
33  
34  
35  
36  
37  
38  
39  
40  
41  
42  
43  
44  
45  
46  
47  
48  
49  
50  
51  
52  
53  
54  
55  
56  
57  
58  
59  
60

**Table 1: Background Characteristics of Bangladeshi Adult Participants (n = 6189)**

| Characteristics                               | Total (n = 6189) |      |      | Men (n = 2824) |              |      | Women (n = 3365) |              |      |
|-----------------------------------------------|------------------|------|------|----------------|--------------|------|------------------|--------------|------|
|                                               | Mean (SD)        | n    | %    | Mean (SD)      | n            | %    | Mean (SD)        | n            | %    |
| Age (years)                                   | 52.9 (9.9)       |      |      | 53.5 (10.1)    |              |      | 52.5 (9.8)       |              |      |
| Education (years)                             | 3.1 (4.2)        |      |      | 4.3 (4.8)      |              |      | 2.1 (3.3)        |              |      |
| Area of Residence                             |                  |      |      |                |              |      |                  |              |      |
| Urban                                         |                  | 1873 | 30.2 |                | 808          | 28.6 |                  | 1065         | 31.6 |
| Rural                                         |                  | 4316 | 69.8 |                | 2016         | 71.4 |                  | 2300         | 68.4 |
| Occupation                                    |                  |      |      |                |              |      |                  |              |      |
| Professional employment <sup>‡</sup>          |                  | 1007 | 16.3 |                | 880          | 31.3 |                  | 127          | 3.8  |
| Industrial worker/Day Laborer                 |                  | 1600 | 25.9 |                | 1440         | 51.2 |                  | 160          | 4.8  |
| Housework                                     |                  | 2697 | 43.7 |                | -            | -    |                  | 2697         | 80.3 |
| Unemployed/Retired                            |                  | 735  | 11.9 |                | 386          | 13.7 |                  | 349          | 10.4 |
| Other <sup>§</sup>                            |                  | 131  | 2.1  |                | 106          | 3.8  |                  | 25           | 0.7  |
| Smoking Tobacco Use <sup>  </sup>             |                  |      |      |                |              |      |                  |              |      |
| Current User                                  |                  | 1493 | 24.2 |                | 1432         | 50.7 |                  | 61           | 1.8  |
| Ever User                                     |                  | 2261 | 36.5 |                | 2150         | 76.1 |                  | 111          | 3.3  |
| Smokeless Tobacco Use <sup>◇</sup>            |                  |      |      |                |              |      |                  |              |      |
| Current User                                  |                  | 3078 | 49.7 |                | 1208         | 42.8 |                  | 1870         | 55.6 |
| Ever User                                     |                  | 3469 | 56.1 |                | 1433         | 50.7 |                  | 2046         | 60.5 |
| Alcohol use in the last 30 days               |                  |      |      |                |              |      |                  |              |      |
| Yes                                           |                  | 75   | 1.2  |                | 68           | 2.4  |                  | 7            | 0.2  |
| Body Mass Index <sup>¶</sup>                  | 21.9 (4.1)       |      |      |                | 21.4 (3.7)   |      |                  | 22.3 (4.4)   |      |
| Waist Circumference** (cm)                    | 82.4 (13.3)      |      |      |                | 81.8 (10.5)  |      |                  | 82.8 (15.2)  |      |
| Blood Pressure                                |                  |      |      |                |              |      |                  |              |      |
| Systolic Blood Pressure <sup>††</sup> (mmHg)  | 119.7 (15.2)     |      |      |                | 119.8 (14.9) |      |                  | 119.7 (15.5) |      |
| Diastolic Blood Pressure <sup>††</sup> (mmHg) | 80.3 (9.5)       |      |      |                | 80.2 (9.4)   |      |                  | 80.3 (9.7)   |      |
| Blood Glucose Levels <sup>§§</sup> (mmol/L)   | 6.9 (3.0)        |      |      |                | 6.9 (3.0)    |      |                  | 6.9 (2.9)    |      |

Abbreviations: SD: Standard Deviation; CM: centimeters; mmHg: millimeter of mercury; mmol/L: millimoles per liter

<sup>‡</sup>Professional occupation includes: Government employee, private company employee, businessman

<sup>§</sup>Other occupation includes: Shop keeper, weavers, driver, student, beggar, cook, carpenter, and tailor

<sup>||</sup>Excluding smokeless tobacco | Missing values, n = 18; Men, n = 11; Women, n = 7

<sup>◇</sup>Smokeless tobacco use includes jorda, white leaf (shaada pata), gul, etc.

<sup>¶</sup>Body mass index (BMI) calculated by weight in kilogram divided by height in meter squared

**Table 2: Ten-year risk of combined myocardial infarction and stroke (fatal and non-fatal) by gender, using the 2019 WHO CVD Risk non-laboratory based charts for South Asia (n = 5977)**

|                           | Total (n = 5977) |      |           | Men (n = 2708) |      |           | Women (n = 3269) |      |           | P*     |
|---------------------------|------------------|------|-----------|----------------|------|-----------|------------------|------|-----------|--------|
|                           | n                | %    | CI        | n              | %    | CI        | n                | %    | CI        |        |
| Very Low Risk (<5%)       | 3115             | 52.1 | 50.8-53.4 | 1034           | 38.2 | 36.6-40.0 | 2081             | 63.7 | 62.0-65.3 | <0.001 |
| Low Risk ( 5-10 %)        | 1972             | 33.0 | 31.8-34.2 | 1047           | 38.7 | 36.8-40.5 | 925              | 28.3 | 26.8-30.0 | <0.001 |
| Moderate Risk (10 - <20%) | 860              | 14.4 | 13.5-15.3 | 600            | 22.2 | 20.6-23.8 | 260              | 7.8  | 7.0-8.9   | <0.001 |
| High Risk (20 - <30%)     | 29               | 0.5  | 0.3-0.7   | 26             | 1.0  | 0.6-1.4   | 3                | 0.1  | 0.0-0.2   | <0.001 |
| Very High Risk (≥ 30%)    | 1                | 0.0  | 0.0-0.01  | 1              | 0.0  | 0.0-0.1   | 0                | 0.0  | 0.0-0.0   | 0.272  |

Abbreviations: CI, confidence interval; WHO, World Health Organization; CVD, Cardiovascular disease

\* P-value based on chi-square test

1  
2  
3  
4  
5  
6  
7  
8  
9  
10  
11  
12  
13  
14  
15  
16  
17  
18  
19  
20  
21  
22  
23  
24  
25  
26  
27  
28  
29  
30  
31  
32  
33  
34  
35  
36  
37  
38  
39  
40  
41  
42  
43  
44  
45  
46  
47

**Table 3: Estimation of percentage of population requiring drug treatment based on total risk approach in comparison to single risk factor approaches (n = 5977)**

|       | Cardiovascular Risk $\geq$ 20% |                                           | Single Risk Factor Approach                                   |
|-------|--------------------------------|-------------------------------------------|---------------------------------------------------------------|
|       | CV Risk $\geq$ 20% alone,<br>% | CV Risk $\geq$ 20% +<br>BP $\geq$ 160/100 | BP $\geq$ 140/90 (SBP $\geq$ 140 + isolated<br>raised DBP), % |
| Men   | 1.0                            | 2.1                                       | 22.1                                                          |
| Women | 0.1                            | 1.6                                       | 26.7                                                          |
| Total | 0.5                            | 1.8                                       | 24.6                                                          |

Abbreviations: CV, cardiovascular; BP, blood pressure; SBP, systolic blood pressure; DBP, diastolic blood pressure

**Table 4: Population projections and comparison of medicine costs (US\$) for implementing total risk approach vs. single risk factor approach in Bangladesh**

| Estimated annual total cost of CVD medication treatment per million population† |                                                               |                                                                  |                                                                        |                                                                |                   |                   |                     |                    |                    |
|---------------------------------------------------------------------------------|---------------------------------------------------------------|------------------------------------------------------------------|------------------------------------------------------------------------|----------------------------------------------------------------|-------------------|-------------------|---------------------|--------------------|--------------------|
| <b>Total risk approach CV Risk ≥ 20% alone</b>                                  |                                                               |                                                                  |                                                                        |                                                                |                   |                   |                     |                    |                    |
|                                                                                 | Total no. of people in the general population (in thousands)* | Percentage of population aged ≥40 years requiring medication (%) | Total no. of people estimated to require drug treatment (in thousands) | No. of people per million population (aged 40 years and older) | Aspirin           | Enalapril         | Hydrochlorothiazide | Simvastatin        | Total              |
| <b>Age Group</b>                                                                |                                                               |                                                                  |                                                                        |                                                                |                   |                   |                     |                    |                    |
| <b>Men</b>                                                                      |                                                               |                                                                  |                                                                        |                                                                |                   |                   |                     |                    |                    |
| 40 to 49                                                                        | 9210                                                          | 0.4                                                              | 3660                                                                   | 4000                                                           | \$6,570.0         | \$34,748.0        | \$12,118.0          | \$62,196.0         | \$115,632.0        |
| 50 to 59                                                                        | 6303                                                          | 0.1                                                              | 596                                                                    | 1000                                                           | \$1,642.5         | \$8,687.0         | \$3,029.5           | \$15,549.0         | \$28,908.0         |
| 60 to 69                                                                        | 3730                                                          | 1.5                                                              | 4733                                                                   | 15000                                                          | \$24,637.5        | \$130,305.0       | \$45,442.5          | \$233,235.0        | \$433,620.0        |
| ≥ 70                                                                            | 1881                                                          | 7.0                                                              | 17507                                                                  | 70000                                                          | \$114,975.0       | \$608,090.0       | \$212,065.0         | \$1,088,430.0      | \$2,023,560.0      |
| <b>Total</b>                                                                    | <b>21124</b>                                                  | <b>1.0</b>                                                       | <b>20769</b>                                                           | <b>10000</b>                                                   | <b>\$16,425.0</b> | <b>\$86,870.0</b> | <b>\$30,295.0</b>   | <b>\$155,490.0</b> | <b>\$289,080.0</b> |
| <b>Women</b>                                                                    |                                                               |                                                                  |                                                                        |                                                                |                   |                   |                     |                    |                    |
| 40 to 49                                                                        | 9087                                                          | 0.0                                                              | 0                                                                      | 0                                                              | \$0.0             | \$0.0             | \$0.0               | \$0.0              | \$0.0              |
| 50 to 59                                                                        | 5662                                                          | 0.0                                                              | 0                                                                      | 0                                                              | \$0.0             | \$0.0             | \$0.0               | \$0.0              | \$0.0              |
| 60 to 69                                                                        | 3257                                                          | 0.0                                                              | 0                                                                      | 0                                                              | \$0.0             | \$0.0             | \$0.0               | \$0.0              | \$0.0              |
| ≥ 70                                                                            | 1638                                                          | 1.6                                                              | 3965                                                                   | 16000                                                          | \$26,280.0        | \$138,992.0       | \$48,472.0          | \$248,784.0        | \$462,528.0        |
| <b>Total</b>                                                                    | <b>19644</b>                                                  | <b>0.1</b>                                                       | <b>1958</b>                                                            | <b>1000</b>                                                    | <b>\$1,642.5</b>  | <b>\$8,687.0</b>  | <b>\$3,029.5</b>    | <b>\$15,549.0</b>  | <b>\$28,908.0</b>  |
| <b>All</b>                                                                      |                                                               |                                                                  |                                                                        |                                                                |                   |                   |                     |                    |                    |
| 40 to 49                                                                        | 18296                                                         | 0.2                                                              | 3605                                                                   | 2000                                                           | \$3,285.0         | \$17,374.0        | \$6,059.0           | \$31,098.0         | \$57,816.0         |
| 50 to 59                                                                        | 11965                                                         | 0.1                                                              | 1134                                                                   | 1000                                                           | \$1,642.5         | \$8,687.0         | \$3,029.5           | \$15,549.0         | \$28,908.0         |
| 60 to 69                                                                        | 6989                                                          | 0.7                                                              | 4206                                                                   | 7000                                                           | \$11,497.5        | \$60,809.0        | \$21,206.5          | \$108,843.0        | \$202,356.0        |
| ≥ 70                                                                            | 3518                                                          | 4.3                                                              | 21410                                                                  | 43000                                                          | \$70,627.5        | \$373,541.0       | \$130,268.5         | \$668,607.0        | \$1,243,044.0      |
| <b>Total</b>                                                                    | <b>40768</b>                                                  | <b>0.5</b>                                                       | <b>20175</b>                                                           | <b>5000</b>                                                    | <b>\$8,212.5</b>  | <b>\$43,435.0</b> | <b>\$15,147.5</b>   | <b>\$77,745.0</b>  | <b>\$144,540.0</b> |

---

**Single Risk Factor Approach: BP  $\geq$  140/90 (SBP  $\geq$  140 + isolated raised DBP), %**


---

|                  | Total no. of people in the general population (in thousands)* | Percentage of population aged $\geq$ 40 years requiring medication (%) | Total no. of people estimated to require drug treatment (in thousands) | No. of people per million population (aged 40 years and older) | Aspirin     | Enalapril     | Hydrochlorothiazide | Simvastatin   | Total         |
|------------------|---------------------------------------------------------------|------------------------------------------------------------------------|------------------------------------------------------------------------|----------------------------------------------------------------|-------------|---------------|---------------------|---------------|---------------|
| <b>Age Group</b> |                                                               |                                                                        |                                                                        |                                                                |             |               |                     |               |               |
| <b>Men</b>       |                                                               |                                                                        |                                                                        |                                                                |             |               |                     |               |               |
| 40 to 49         | 9210                                                          | 17.1                                                                   | 156482                                                                 | 171000                                                         | \$280,867.5 | \$1,485,477.0 | \$518,044.5         | \$2,658,879.0 | \$4,943,268.0 |
| 50 to 59         | 6303                                                          | 21.7                                                                   | 129375                                                                 | 217000                                                         | \$356,422.5 | \$1,885,079.0 | \$657,401.5         | \$3,374,133.0 | \$6,273,036.0 |
| 60 to 69         | 3730                                                          | 30.5                                                                   | 96228                                                                  | 305000                                                         | \$500,962.5 | \$2,649,535.0 | \$923,997.5         | \$4,742,445.0 | \$8,816,940.0 |
| $\geq$ 70        | 1881                                                          | 29.4                                                                   | 73529                                                                  | 294000                                                         | \$482,895.0 | \$2,553,978.0 | \$890,673.0         | \$4,571,406.0 | \$8,498,952.0 |
| Total            | 21124                                                         | 22.1                                                                   | 458995                                                                 | 221000                                                         | \$362,992.5 | \$1,919,827.0 | \$669,519.5         | \$3,436,329.0 | \$6,388,668.0 |
| <b>Women</b>     |                                                               |                                                                        |                                                                        |                                                                |             |               |                     |               |               |
| 40 to 49         | 9087                                                          | 22.5                                                                   | 199643                                                                 | 225000                                                         | \$369,562.5 | \$1,954,575.0 | \$681,637.5         | \$3,498,525.0 | \$6,504,300.0 |
| 50 to 59         | 5662                                                          | 30.6                                                                   | 164475                                                                 | 306000                                                         | \$502,605.0 | \$2,658,222.0 | \$927,027.0         | \$4,757,994.0 | \$8,845,848.0 |
| 60 to 69         | 3257                                                          | 28.7                                                                   | 81881                                                                  | 287000                                                         | \$471,397.5 | \$2,493,169.0 | \$869,466.5         | \$4,462,563.0 | \$8,296,596.0 |
| $\geq$ 70        | 1638                                                          | 33.7                                                                   | 83509                                                                  | 337000                                                         | \$553,522.5 | \$2,927,519.0 | \$1,020,941.5       | \$5,240,013.0 | \$9,741,996.0 |
| Total            | 19644                                                         | 26.7                                                                   | 522759                                                                 | 267000                                                         | \$438,547.5 | \$2,319,429.0 | \$808,876.5         | \$4,151,583.0 | \$7,718,436.0 |
| <b>All</b>       |                                                               |                                                                        |                                                                        |                                                                |             |               |                     |               |               |
| 40 to 49         | 18296                                                         | 20.2                                                                   | 364085                                                                 | 202000                                                         | \$331,785.0 | \$1,754,774.0 | \$611,959.0         | \$3,140,898.0 | \$5,839,416.0 |
| 50 to 59         | 11965                                                         | 26.3                                                                   | 298189                                                                 | 263000                                                         | \$431,977.5 | \$2,284,681.0 | \$796,758.5         | \$4,089,387.0 | \$7,602,804.0 |
| 60 to 69         | 6989                                                          | 29.5                                                                   | 177236                                                                 | 295000                                                         | \$484,537.5 | \$2,562,665.0 | \$893,702.5         | \$4,586,955.0 | \$8,527,860.0 |
| $\geq$ 70        | 3518                                                          | 31.6                                                                   | 157336                                                                 | 316000                                                         | \$519,030.0 | \$2,745,092.0 | \$957,322.0         | \$4,913,484.0 | \$9,134,928.0 |
| Total            | 40768                                                         | 24.6                                                                   | 992585                                                                 | 246000                                                         | \$404,055.0 | \$2,137,002.0 | \$745,257.0         | \$3,825,054.0 | \$7,111,368.0 |

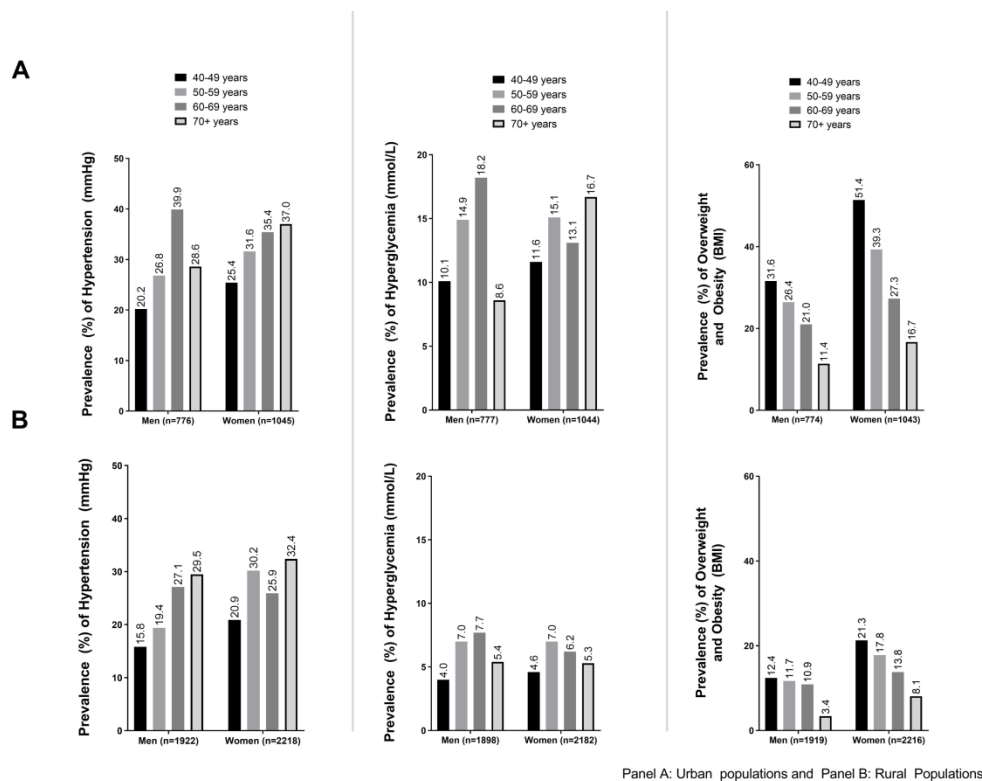

Panel A: Urban populations and Panel B: Rural Populations

Figure 1: Prevalence of hypertension, hyperglycemia, and overweight and obesity among Bangladeshi adults aged 40 years and above by area of residence and age group.

281x220mm (300 x 300 DPI)

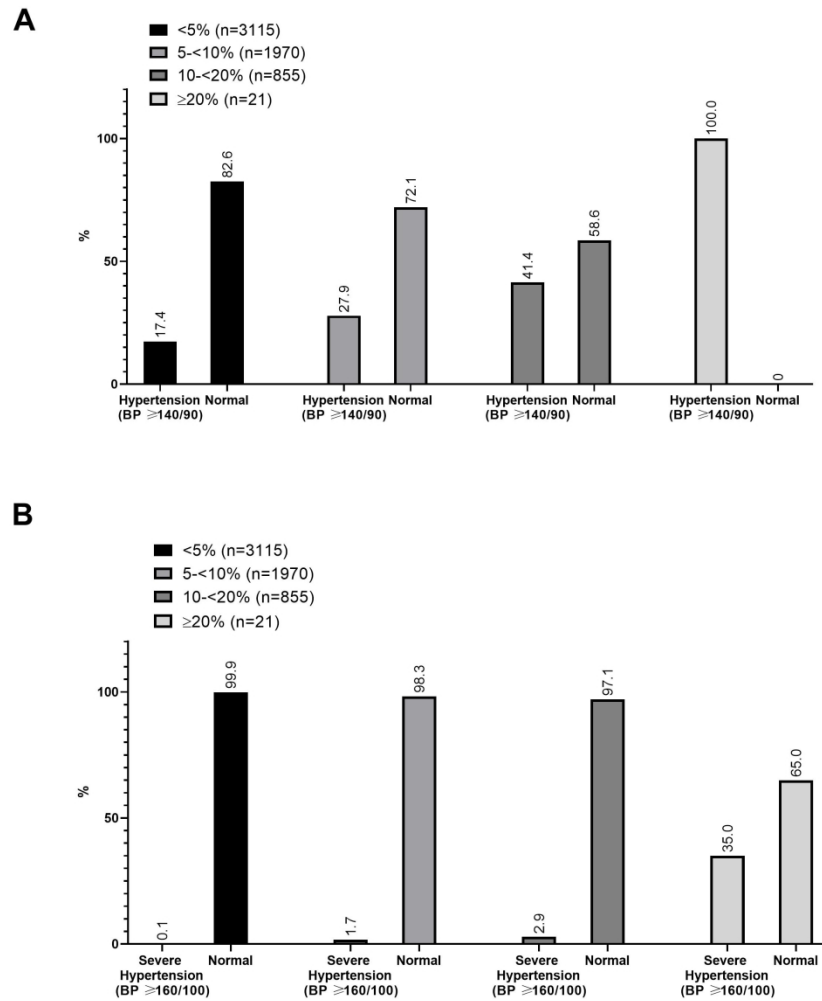

Panel A: % of adults with hypertension by CVD Risk Group  
 Panel B: % of adults with severe hypertension by CVD Risk Group

Figure 2: Proportion of adults with hypertension or severe hypertension by CVD risk group

205x276mm (300 x 300 DPI)



1  
2  
3  
4  
5  
6  
7  
8  
9  
10  
11  
12  
13  
14  
15  
16  
17  
18  
19  
20  
21  
22  
23  
24  
25  
26  
27  
28  
29  
30  
31  
32  
33  
34  
35  
36  
37  
38  
39  
40  
41  
42  
43  
44  
45  
46  
47  
48  
49  
50  
51  
52  
53  
54  
55  
56  
57  
58  
59  
60

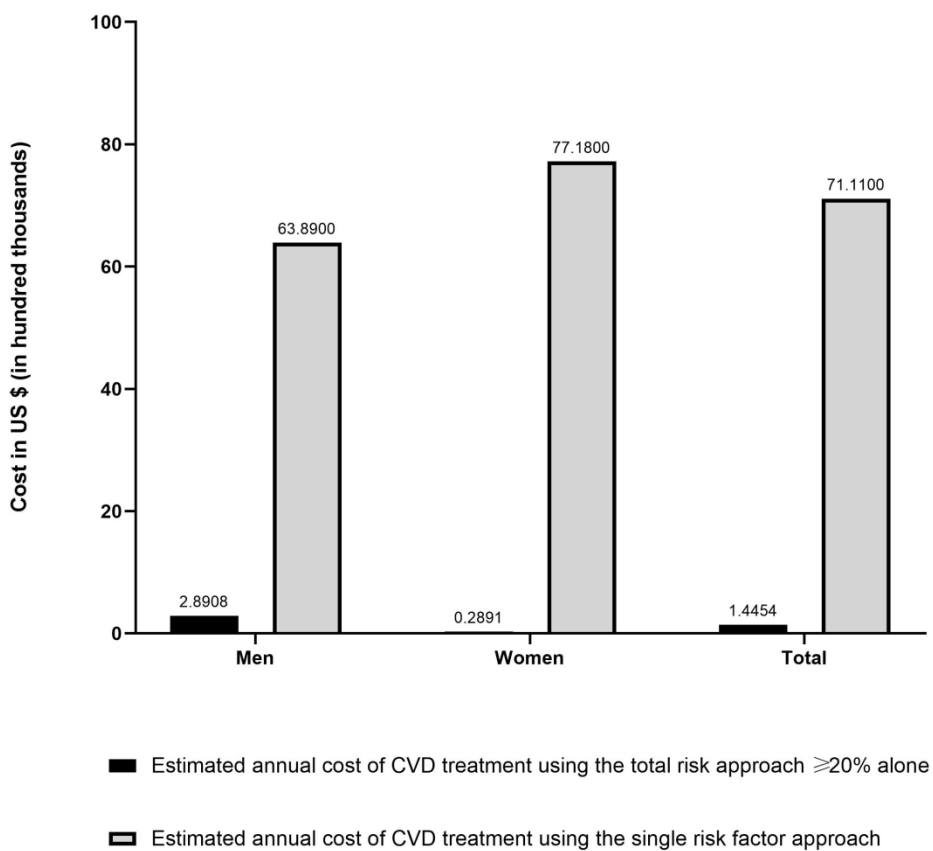

Figure 3: Annual costs of pharmacologic treatment for CVD by sex and risk stratification approach

199x175mm (300 x 300 DPI)

**Appendix Table 1: Cost of common drugs used to treat cardiovascular disease in Bangladesh (converted to US\$)**

| Drug Name                 | Dose   | Number of Tablets | Category                                                    | Median price (in Bangladeshi Taka) | Price (in US\$)* |
|---------------------------|--------|-------------------|-------------------------------------------------------------|------------------------------------|------------------|
| Aspirin                   | 100 mg | 100 tablets       | Antiplatelet drugs                                          | 38BDT                              | 0.45             |
| Atenolol                  | 50 mg  | 100 tablets       | Antihypertensive, Beta-adrenoreceptor blocking drugs        | 77BDT                              | 0.92             |
| Captopril                 | 25 mg  | 100 tablets       | Antihypertensive, ACE inhibitors                            | 300 BDT                            | 3.58             |
| Chlorthalidone            | 25 mg  | 30 tablets        | Antihypertensive, thiazide diuretics                        | 60 BDT                             | 0.72             |
| Enalapril                 | 10 mg  | 100 tablets       | Antihypertensive, ACE inhibitors                            | 200 BDT                            | 2.38             |
| Frusemide                 | 40 mg  | 100 tablets       | Antihypertensive, loop diuretics                            | 53 BDT                             | 0.63             |
| Hydrochlorothiazide       | 25 mg  | 100 tablets       | Antihypertensive, thiazide diuretics                        | 70 BDT                             | 0.83             |
| Isosorbide dinitrate      | 10 mg  | 100 tablets       | Angina treatment, nitrates - coronary vasodilators          | 35 BDT                             | 0.42             |
| Labetalol                 | 100 mg | 60 tablets        | Antihypertensive, Beta-adrenoreceptor blocking drugs        | 361.2 BDT                          | 4.31             |
| Losartan                  | 50 mg  | 100 tablets       | Antihypertensive, Angiotensin-II receptor blocker           | 600 BDT                            | 7.15             |
| Lovastatine               | 20 mg  | 30 tablets        | Lipid regulation, statin                                    | 303.3 BDT                          | 3.62             |
| Methyldopa                | 250 mg | 100 tables        | Antihypertensive, Centrally acting or central sympatholytic | 308 BDT                            | 3.67             |
| Nifedipine (slow release) | 20 mg  | 100 tablets       | Angina treatment, calcium-channel blocker                   | 64 BDT                             | 0.76             |
| Propranolol hydrochloride | 10 mg  | 100 tablets       | Antihypertensive, Beta-adrenoreceptor blocking drugs        | 24 BDT                             | 0.29             |
| Simvastatine              | 10 mg  | 30 tablets        | Lipid regulation, statin                                    | 360 BDT                            | 4.29             |

|   |                |             |             |                              |          |       |
|---|----------------|-------------|-------------|------------------------------|----------|-------|
| 1 |                |             |             |                              |          |       |
| 2 |                |             |             |                              |          |       |
| 3 |                |             |             | Antihypertensive, potassium- |          |       |
| 4 |                |             |             | sparing diuretics &          |          |       |
| 5 | Spironolactone | 25 mg       | 100 tablets | aldosterone antagonist       | 202 BDT  | 2.41  |
| 6 |                | 1.5 million |             |                              |          |       |
| 7 | Streptokinase  | unit/vial   | One vial    | Anticoagulant                | 3100 BDT | 36.96 |
| 8 | Warfarin       | 5 mg        | 100 tablets | Anticoagulant                | 300 BDT  | 3.58  |
| 9 |                |             |             |                              |          |       |

Abbreviations: mg, milligrams; US, United States; BDT, Bangladeshi Taka

\*Price conversion based on exchange rate on 02/07/2019

For peer review only

**STROBE 2007 (v4) Statement—Checklist of items that should be included in reports of *cross-sectional studies***

| Section/Topic                | Item # | Recommendation                                                                                                                                                                       | Reported on page # |
|------------------------------|--------|--------------------------------------------------------------------------------------------------------------------------------------------------------------------------------------|--------------------|
| <b>Title and abstract</b>    | 1      | (a) Indicate the study's design with a commonly used term in the title or the abstract                                                                                               | 2                  |
|                              |        | (b) Provide in the abstract an informative and balanced summary of what was done and what was found                                                                                  | 2-3                |
| <b>Introduction</b>          |        |                                                                                                                                                                                      |                    |
| Background/rationale         | 2      | Explain the scientific background and rationale for the investigation being reported                                                                                                 | 5-6                |
| Objectives                   | 3      | State specific objectives, including any prespecified hypotheses                                                                                                                     | 6                  |
| <b>Methods</b>               |        |                                                                                                                                                                                      |                    |
| Study design                 | 4      | Present key elements of study design early in the paper                                                                                                                              | 6                  |
| Setting                      | 5      | Describe the setting, locations, and relevant dates, including periods of recruitment, exposure, follow-up, and data collection                                                      | 7                  |
| Participants                 | 6      | (a) Give the eligibility criteria, and the sources and methods of selection of participants                                                                                          | 6                  |
| Variables                    | 7      | Clearly define all outcomes, exposures, predictors, potential confounders, and effect modifiers. Give diagnostic criteria, if applicable                                             | 8-10               |
| Data sources/<br>measurement | 8*     | For each variable of interest, give sources of data and details of methods of assessment (measurement). Describe comparability of assessment methods if there is more than one group | 7-10               |
| Bias                         | 9      | Describe any efforts to address potential sources of bias                                                                                                                            | 6-7 & 15-16        |
| Study size                   | 10     | Explain how the study size was arrived at                                                                                                                                            | 7                  |
| Quantitative variables       | 11     | Explain how quantitative variables were handled in the analyses. If applicable, describe which groupings were chosen and why                                                         | 9-10               |
| Statistical methods          | 12     | (a) Describe all statistical methods, including those used to control for confounding                                                                                                | 9-10               |
|                              |        | (b) Describe any methods used to examine subgroups and interactions                                                                                                                  | 8-11               |
|                              |        | (c) Explain how missing data were addressed                                                                                                                                          | 9                  |
|                              |        | (d) If applicable, describe analytical methods taking account of sampling strategy                                                                                                   | N/A                |
|                              |        | (e) Describe any sensitivity analyses                                                                                                                                                | N/A                |
| <b>Results</b>               |        |                                                                                                                                                                                      |                    |

|                          |     |                                                                                                                                                                                                              |       |
|--------------------------|-----|--------------------------------------------------------------------------------------------------------------------------------------------------------------------------------------------------------------|-------|
| Participants             | 13* | (a) Report numbers of individuals at each stage of study—eg numbers potentially eligible, examined for eligibility, confirmed eligible, included in the study, completing follow-up, and analysed            | 10    |
|                          |     | (b) Give reasons for non-participation at each stage                                                                                                                                                         | N/A   |
|                          |     | (c) Consider use of a flow diagram                                                                                                                                                                           | N/A   |
| Descriptive data         | 14* | (a) Give characteristics of study participants (eg demographic, clinical, social) and information on exposures and potential confounders                                                                     | 10    |
|                          |     | (b) Indicate number of participants with missing data for each variable of interest                                                                                                                          | 9     |
| Outcome data             | 15* | Report numbers of outcome events or summary measures                                                                                                                                                         |       |
| Main results             | 16  | (a) Give unadjusted estimates and, if applicable, confounder-adjusted estimates and their precision (eg, 95% confidence interval). Make clear which confounders were adjusted for and why they were included | N/A   |
|                          |     | (b) Report category boundaries when continuous variables were categorized                                                                                                                                    | N/A   |
|                          |     | (c) If relevant, consider translating estimates of relative risk into absolute risk for a meaningful time period                                                                                             | N/A   |
| Other analyses           | 17  | Report other analyses done—eg analyses of subgroups and interactions, and sensitivity analyses                                                                                                               | 10    |
| <b>Discussion</b>        |     |                                                                                                                                                                                                              |       |
| Key results              | 18  | Summarise key results with reference to study objectives                                                                                                                                                     | 12-14 |
| Limitations              | 19  | Discuss limitations of the study, taking into account sources of potential bias or imprecision. Discuss both direction and magnitude of any potential bias                                                   | 15-16 |
| Interpretation           | 20  | Give a cautious overall interpretation of results considering objectives, limitations, multiplicity of analyses, results from similar studies, and other relevant evidence                                   | 13-16 |
| Generalisability         | 21  | Discuss the generalisability (external validity) of the study results                                                                                                                                        | 15    |
| <b>Other information</b> |     |                                                                                                                                                                                                              |       |
| Funding                  | 22  | Give the source of funding and the role of the funders for the present study and, if applicable, for the original study on which the present article is based                                                | 19    |

\*Give information separately for cases and controls in case-control studies and, if applicable, for exposed and unexposed groups in cohort and cross-sectional studies.

**Note:** An Explanation and Elaboration article discusses each checklist item and gives methodological background and published examples of transparent reporting. The STROBE checklist is best used in conjunction with this article (freely available on the Web sites of PLoS Medicine at <http://www.plosmedicine.org/>, Annals of Internal Medicine at <http://www.annals.org/>, and Epidemiology at <http://www.epidem.com/>). Information on the STROBE Initiative is available at [www.strobe-statement.org](http://www.strobe-statement.org).

# BMJ Open

## Estimation of total cardiovascular risk using the 2019 WHO CVD prediction charts and comparison of population-level costs based on alternative drug therapy guidelines: a population-based study of adults in Bangladesh

|                                 |                                                                                                                                                                                                                                                                                                                                                                                                                                                               |
|---------------------------------|---------------------------------------------------------------------------------------------------------------------------------------------------------------------------------------------------------------------------------------------------------------------------------------------------------------------------------------------------------------------------------------------------------------------------------------------------------------|
| Journal:                        | <i>BMJ Open</i>                                                                                                                                                                                                                                                                                                                                                                                                                                               |
| Manuscript ID                   | bmjopen-2019-035842.R2                                                                                                                                                                                                                                                                                                                                                                                                                                        |
| Article Type:                   | Original research                                                                                                                                                                                                                                                                                                                                                                                                                                             |
| Date Submitted by the Author:   | 21-Apr-2020                                                                                                                                                                                                                                                                                                                                                                                                                                                   |
| Complete List of Authors:       | Islam, Jessica; World Health Organization Country Office for Bangladesh, ; University of North Carolina at Chapel Hill Gillings School of Global Public Health, Department of Epidemiology<br>Zaman, MM; World Health Organization, Dhaka, Bangladesh, Moniruzzaman, Mohammad; Shiga University of Medical Science, Public Health<br>Ara Shakoor, Shawkat; National Institute of Ophthalmology<br>Hossain, A.H.M. Enayet; National Institute of Ophthalmology |
| <b>Primary Subject Heading</b>: | Epidemiology                                                                                                                                                                                                                                                                                                                                                                                                                                                  |
| Secondary Subject Heading:      | Cardiovascular medicine                                                                                                                                                                                                                                                                                                                                                                                                                                       |
| Keywords:                       | Cardiac Epidemiology < CARDIOLOGY, EPIDEMIOLOGY, Hypertension < CARDIOLOGY, Ischaemic heart disease < CARDIOLOGY, Myocardial infarction < CARDIOLOGY                                                                                                                                                                                                                                                                                                          |
|                                 |                                                                                                                                                                                                                                                                                                                                                                                                                                                               |

SCHOLARONE™  
Manuscripts



I, the Submitting Author has the right to grant and does grant on behalf of all authors of the Work (as defined in the below author licence), an exclusive licence and/or a non-exclusive licence for contributions from authors who are: i) UK Crown employees; ii) where BMJ has agreed a CC-BY licence shall apply, and/or iii) in accordance with the terms applicable for US Federal Government officers or employees acting as part of their official duties; on a worldwide, perpetual, irrevocable, royalty-free basis to BMJ Publishing Group Ltd ("BMJ") its licensees and where the relevant Journal is co-owned by BMJ to the co-owners of the Journal, to publish the Work in this journal and any other BMJ products and to exploit all rights, as set out in our [licence](#).

The Submitting Author accepts and understands that any supply made under these terms is made by BMJ to the Submitting Author unless you are acting as an employee on behalf of your employer or a postgraduate student of an affiliated institution which is paying any applicable article publishing charge ("APC") for Open Access articles. Where the Submitting Author wishes to make the Work available on an Open Access basis (and intends to pay the relevant APC), the terms of reuse of such Open Access shall be governed by a Creative Commons licence – details of these licences and which [Creative Commons](#) licence will apply to this Work are set out in our licence referred to above.

Other than as permitted in any relevant BMJ Author's Self Archiving Policies, I confirm this Work has not been accepted for publication elsewhere, is not being considered for publication elsewhere and does not duplicate material already published. I confirm all authors consent to publication of this Work and authorise the granting of this licence.

1  
2  
3 **Estimation of total cardiovascular risk using the 2019 WHO CVD prediction charts and**  
4 **comparison of population-level costs based on alternative drug therapy guidelines: a population-**  
5 **based study of adults in Bangladesh**  
6  
7

8  
9 Running title: Total cardiovascular risk approach in Bangladesh

10 Authors: Jessica Yasmine Islam<sup>1</sup>, M Mostafa Zaman<sup>2</sup>, Mohammad Moniruzzaman<sup>3</sup>, Shawkat Ara  
11 Shakoor<sup>4</sup>, A.H.M. Enayet Hossain<sup>4</sup>  
12  
13

14  
15 Author Affiliations:

16  
17 <sup>1</sup>Department of Epidemiology, Gillings School of Global Public Health, University of North Carolina at  
18 Chapel Hill, North Carolina, USA  
19

20 <sup>2</sup>Research and Publication Unit, World Health Organization, Dhaka, Bangladesh  
21

22 <sup>3</sup>Center for Epidemiologic Research in Asia, Shiga University of Medical Science, Otsu, Shiga, Japan  
23

24 <sup>4</sup>National Institute of Ophthalmology. Sher-e-Bangla Nagar, Dhaka, Bangladesh  
25  
26  
27  
28

29 Corresponding Author:

30  
31 Dr. Jessica Yasmine Islam, PhD, MPH  
32 Department of Epidemiology  
33 UNC Gillings School of Global Public Health  
34 UNC Chapel Hill  
35 135 Dauer Drive  
36 Chapel Hill, NC 27599  
37 Email: [islamjy@email.unc.edu](mailto:islamjy@email.unc.edu)  
38  
39  
40  
41  
42  
43  
44  
45  
46  
47  
48  
49  
50  
51  
52  
53  
54  
55  
56  
57  
58  
59  
60



## Abstract

Objective: The objective of this study is to estimate the population distribution of 10-year cardiovascular disease (CVD) risk among Bangladeshi adults aged 40 years and above, using the 2019 World Health Organization (WHO) CVD Risk Prediction Charts. Additionally, we compared the cost of CVD pharmacologic treatment based on the total CVD risk (thresholds  $\geq 30\%$ / $\geq 20\%$ ) and the single risk factor (hypertension) cutoff levels in the Bangladeshi context.

Study Design: Cross-sectional, population-based study

Setting and Participants: From 2013-2014, we collected data from a nationally representative cross-sectional survey of adults aged  $\geq 40$  years from urban and rural areas of Bangladesh ( $n = 6189$ ). We estimated CVD risk using the 2019 WHO CVD Risk Prediction Charts and categorized as very low ( $<5\%$ ), low ( $5-<10\%$ ), moderate ( $10-<20\%$ ), high ( $20-<30\%$ ), and very high risk ( $\geq 30\%$ ). We estimated drug therapy costs using the lowest price of each drug class available (aspirin, thiazide diuretics, statins, and angiotensin-converting enzyme inhibitors). We compared the total cost of drug therapy using the total CVD risk vs. single risk factor approach.

Primary Outcome Measures: Our primary outcome was 10-year CVD risk categorized as very low ( $<5\%$ ), low ( $5-<10\%$ ), moderate ( $10-<20\%$ ), high ( $20-<30\%$ ), and very high risk ( $\geq 30\%$ ).

Results: The majority of adults (85.2%, 95% CI: 84.3–86.1) have a 10-year CVD risk of less than 10%. The proportion of adults with a 10-year CVD risk of  $\geq 20\%$  was 0.51%. Only one adult was categorized with a 10-year CVD risk of  $\geq 30\%$ . Among adults with CVD risk groups of very low, low, and moderate, 17.4%, 27.9%, and 41.4% had hypertension (BP  $\geq 140/90$ ) and 0.1%, 1.7%, and 2.9% had severe

1  
2  
3 hypertension (BP $\geq$ 160/100), respectively. Using the total CVD risk approach would reduce drug costs per  
4  
5 million populations to \$144,540 (risk of  $\geq$  20%).  
6  
7

8  
9 Conclusion: To reduce health care expenditure for the prevention and treatment of CVD, a total risk  
10  
11 approach using the 2019 WHO CVD Risk Prediction Chart may lead to cost-savings.  
12  
13

14  
15 **Keywords:** non-communicable diseases, Bangladesh, cardiovascular disease, pharmacologic  
16  
17 intervention, cost, chronic disease  
18  
19  
20  
21  
22  
23  
24  
25  
26  
27  
28  
29  
30  
31  
32  
33  
34  
35  
36  
37  
38  
39  
40  
41  
42  
43  
44  
45  
46  
47  
48  
49  
50  
51  
52  
53  
54  
55  
56  
57  
58  
59  
60

## Article Summary

### Strengths and Limitations of the Study

- Using the recently updated 2019 WHO CVD Risk Prediction Charts, this study provides evidence for incorporating the WHO CVD Risk Prediction Charts into CVD management and health care guidelines, and may lead to potential cost-savings from a societal perspective.
- The 2019 WHO CVD Risk Prediction Charts should be applied to a population who have not experienced a CVD event in the past, however, we were unable to confirm self-reported medical history of participants using medical charts or health records, leading to the potential for measurement error due to recall bias.
- The cost estimates we present are an underestimate of total costs for CVD-related treatment as the focus of this study is on the cost of pharmacologic intervention only as the largest contributor to overall direct costs in Bangladesh.
- Although we present the total number of people estimated to require drug treatment using 2014 population data, we were unable to identify population estimates of only those at risk of their first CVD event due to lack of surveillance data.
- The CVD 10-year risk cut-offs were defined using risk prediction models derived from 85 cohorts mostly from high-income countries, as data from large-scale prospective cohort data from most low-income and middle-income countries (LMICs) are limited.

## Background

Globally, cardiovascular disease (CVD) is the leading cause of death and disproportionately impacts low- and middle-income countries (LMICs), where over 75% of CVD-related deaths occur (1). People living in LMICs are at high risk of developing CVDs due to the absence of integrated primary care for early detection and prevention of CVD-related risk factors, such as high cholesterol, high blood pressure, and smoking. Limited access to primary care and the growing burden of CVDs is a significant cause of poverty in LMICs and hinders the macroeconomic development of many countries(2). LMICs are estimated to experience cumulative economic losses exceeding 7 trillion US dollars over the next 15 years due to morbidity and mortality caused by noncommunicable diseases, including CVD(3). As such, the significance of the CVD epidemic has gained increasing international recognition over the past decade, leading to the development of several international guidelines for CVD control and prevention(4).

In 2007, the World Health Organization (WHO) published pocket guidelines, including CVD risk prediction charts, designed for health care workers in LMICs to guide patient 10-year risk stratification for heart attack or stroke(5). There are two possible strategies suitable for a low resource setting to assess the risk of a cardiovascular event and identify those at high risk of a fatal CVD outcome: 1. Utilize a single risk factor management strategy, which focuses on one condition at a time, such as hypertension; or, 2. Utilize a more holistic approach considering several risk factors such as age, tobacco use, gender, diabetes diagnosis, body mass index, blood pressure, and blood cholesterol when measured. Through the total risk approach, pocket guidelines help to identify high-risk patients that are in imminent danger of a heart attack or stroke for timely pharmacologic treatment or surgical interventions. Additionally, applying the total risk approach via the WHO prediction charts in a nationally representative sample provides an opportunity to estimate and monitor the population-level distribution of CVD risk to ultimately inform CVD treatment policy recommendations (6, 7).

Currently, Bangladesh has not incorporated clinical guidelines for screening or treatment of risk factors based on absolute CVD risk scores and estimation of the population distribution of CVD risk over time. Data are needed to support the implementation of the WHO prediction charts as clinical guidelines

1  
2  
3 for Bangladesh, a resource-limited setting, to demonstrate the potential cost-savings and benefit of the  
4 WHO recommendation on CVD prevention. Recently in 2019, the WHO updated the CVD risk charts  
5 based on newly validated risk prediction models to estimate CVD risk in 21 Global Burden of Disease  
6 regions(8). The newly developed risk prediction models have been calibrated using data from The Global  
7 Burden of Disease study to include estimates from LMICs. To our knowledge, here we present the first  
8 analysis to apply the updated CVD risk charts among a cohort of Bangladeshi adults. Prior studies  
9 conducted in Bangladesh have estimated CVD risk among adults residing in rural areas only and have not  
10 included a nationally representative population (9-11). Additionally, no prior studies have estimated the  
11 potential costs of pharmacological treatment for CVD in Bangladesh using either the single risk factor or  
12 total CVD risk approach, as done previously in other settings(7). Our objective was to assess the  
13 distribution of absolute CVD risk among a nationally representative sample of Bangladeshi adults using  
14 the 2019 WHO CVD Risk Prediction Chart recommended for the WHO South Asian Region  
15 (Bangladesh, Bhutan, India, Nepal, and Pakistan). We also compared the costs of drug treatments for  
16 CVD prevention using the total cardiovascular risk thresholds at  $\geq 20\%$  and with single risk factor cutoff  
17 levels (blood pressure  $\geq 140/90$  mm Hg).  
18  
19  
20  
21  
22  
23  
24  
25  
26  
27  
28  
29  
30  
31  
32  
33  
34  
35  
36

## 37 **Methods**

### 38 Study design and setting

39  
40  
41 Data were analyzed from a population-based cross-sectional study conducted from September to  
42 December 2013 to assess the burden of blindness and low vision among adults in Bangladesh. The target  
43 population of this survey included men and women residing in Bangladesh over the age of 40 years. The  
44 exclusion criteria included tourists and the institutionalized, such as residents of a military base, hospital,  
45 prisons, nursing homes, and other such institutions. We obtained ethical approval for this study from the  
46 Institutional Review Board of the National Institute of Ophthalmology. We provided participants with  
47 detailed information regarding the study objectives and procedures using a printed handout prepared in  
48  
49  
50  
51  
52  
53  
54  
55  
56  
57  
58  
59  
60

1  
2  
3 Bengali. Written consent was obtained from participants through signature or, if not possible through  
4  
5 thumbprint.  
6  
7

### 8 9 Sampling Frame

10  
11 We adopted a multistage, geographically clustered, probability-based sampling approach to  
12  
13 obtain a nationally representative sample of Bangladesh, as previously described and outlined per the  
14  
15 WHO STEPwise approach (12-15). Population statistics were obtained using the 2011 national census  
16  
17 conducted by the Bangladesh Bureau of Statistics (BBS) to create the sample frame (16). The sampling  
18  
19 frame included 64,407 primary sampling units (PSUs) covering all seven divisions of the country. We  
20  
21 randomly selected seventy-two PSUs (25 urban and 47 rural) from seven divisions, with the probability of  
22  
23 selection proportional to the population size of each division. In each PSU, we selected 100 consecutive  
24  
25 households as the secondary sampling unit.  
26  
27

28  
29 For each household, a trained field data collector approached the head of the household or the  
30  
31 family member most knowledgeable of the residents to screen for eligible participants. The screening  
32  
33 respondent was asked to describe the composition of household residents, which was defined as those  
34  
35 who considered the home to be their primary place of residence as of the night before. A list was  
36  
37 composed and ordered from youngest to oldest age in years starting from 40 years. Using the list of  
38  
39 eligible residents, we used the Kish table approach to randomly select one participant from each home.  
40  
41 The selected participant was asked to come to a nearby health center the next day to administer the survey  
42  
43 by trained study interviewers and undergo a medical examination by the study physician. Based on the  
44  
45 medical review, participants were followed-up with by the providers at the health center for treatment.  
46  
47  
48

### 49 Patient and Public Involvement

50  
51 There was no patient or public involvement in the implementation of this study or interpretation  
52  
53 of analytic results.  
54  
55  
56  
57  
58  
59  
60

### Data Collection

To ensure effective and uniform data collection, field interviewers underwent a seven-day training on the interview methodology by the study ophthalmologists and epidemiologists. The training included an in-depth review of the survey content and protocol for completing the demographic questionnaire (a modified WHO/PBL Version III). Each member of the data collection team was provided a detailed survey protocol manual outlining the survey activities, the questionnaire interview, and information about the duties and responsibilities of all survey personnel.

Demographic data were collected, including age, sex, marital status, educational level, and occupation, using a structured questionnaire survey. Data regarding tobacco use, health history, and treatment history were also collected. Participants were asked if they smoked (e.g. cigarette, hookah, pipe) or if they used smokeless tobacco (e.g. chewing tobacco, jorda) to assess the history of tobacco use. Each participant provided medical history for a prior diagnosis of high blood pressure or hypertension, diabetes, renal disease, or any cardiovascular diseases by a health care provider. Medication history was obtained including medication for high blood pressure, diabetes, malaria, steroids, tuberculosis, and among women, history of oral contraception. The questionnaire was translated from English to Bengali, adapted, and validated before data collection.

Physical measurements, including height, weight, and blood pressure (BP) were collected. Trained field interviewers measured BP using an appropriately calibrated aneroid sphygmomanometer with appropriately sized arm cuffs. BP measurements were consistently taken on the right arm at heart level and elbow-assisted while the participant was seated. The initial measurement was performed after five minutes of rest. After two minutes, the second measurement was taken. The mean of these two BP readings was utilized as the final BP for each participant. To measure blood glucose levels, we obtained random blood glucose samples (17). Capillary blood samples were consistently taken using the right arm and index finger with a glucometer (Accu-chek Advantage, Roche Diagnostics Division, Grenzachstrasse, Switzerland).

### Estimation of 10-year CVD risk

We estimated 10-year CVD risk using the 2019 WHO CVD risk prediction charts(8, 18). The prediction charts provide the 10-year risk of a fatal or non-fatal major cardiovascular event, such as myocardial infarction or stroke, based on age, sex, blood pressure, body mass index, smoking status, total blood cholesterol, and the presence or absence of diabetes mellitus for 14 WHO epidemiological sub-regions. For each region, two sets of charts have been developed based on the availability of laboratory-based results. As total cholesterol was not measured in our cohort, we utilized the WHO cardiovascular disease risk non-laboratory-based charts developed for South Asia (including, Bangladesh, Bhutan, India, Nepal, and Pakistan). The non-laboratory-based risk charts do not account for diabetes diagnosis or total cholesterol levels.

The prediction chart grades CVD risk using the following categories: age (1: 40–44years; 2: 45-49 years; 3: 50-54 years; 4: 55-59 years; 5: 60-64 years; 6: 64-69 years; 7: 70-74 years), sex (men and women), smoking (smoker or non-smoker), systolic blood pressure (<120 mmHg, 120 to 139, 140 to 159, 160 - <180, and  $\geq$ 180), and body mass index (<20, 20-24, 25-29, 30-35, and  $\geq$ 35). The risk categories for 10-year combined acute myocardial infarction and stroke (fatal and non-fatal) are as follows: <5%, 5- <10%, 10 - <20%, 20 to <30%, and  $\geq$  30%.

Observations with missing values were dropped from the analysis. We did not anticipate any bias from the complete-case analysis approach as the number of missing observations for key variables was less than 2%: smoking status, n=18 or 0.3% missing values; systolic blood pressure, n = 22 or 0.4% missing values; diastolic blood pressure, n = 25 or 0.4% missing values; and body mass index, n=30 or 0.5%.

### Data Analysis

We present sociodemographic variables using mean (standard deviation) or the median (interquartile range) for continuous variables and proportion for categorical variables. We conducted bivariate analyses by sex and age group. We used the chi-square test to assess for any significant



1  
2  
3 differences in CVD risk distribution across sex. For estimating the cost of medicines per million per year  
4 (population aged 40 years or older), we used the lowest price of each drug class available in the market  
5 (generic preparation of aspirin, thiazide diuretics, statins, and angiotensin-converting enzyme inhibitors).  
6  
7 Appendix Table 1 includes further details regarding the specific costs of common drugs used to treat  
8  
9  
10  
11  
12 cardiovascular disease in Bangladesh.

13  
14 To calculate costs we included the following categories: (1) people with high cardiovascular risk  
15 ( $\geq 20\%$  and  $BP \geq 160/100$ ), who are recommended for pharmacological intervention using four different  
16  
17 types of drugs for treatment<sup>(5, 7)</sup>; and (2) people with  $BP \geq 140/90$ , who are recommended  
18  
19 antihypertensive treatment. To calculate the estimated annual total cost of CVD medication treatment per  
20  
21 million populations (aged 40 years or older), we multiplied the percentage of the population at risk and  
22  
23 the price of medicine in Bangladesh. We included an estimate of the total number of people estimated to  
24  
25 require drug treatment as follows: we multiplied the prevalence of the population requiring medication  
26  
27 based on each approach by the number of people in the general population in 2013 (19) stratified by  
28  
29  
30  
31 gender and age group.

## 32 33 34 35 **Results**

### 36 37 Demographic Characteristics

38  
39 The mean age of included participants was 52.9 years (men: 53.5 years, women: 52.5 years)  
40  
41 (Table 1). The average level of educational attainment was 3.1 years of education; women were generally  
42  
43 less educated than men (2.1 years vs. 4.3 years, respectively). The majority (80%) of women were  
44  
45 housewives, and among men, the most common occupation was an industrial worker or day laborer  
46  
47 (51.2%). Overall, over one-third of participants ever used smoking tobacco, and over half ever used  
48  
49 smokeless tobacco. Few participants drank alcohol in the past 30 days (1.2%). The mean BMI was 21.9  
50  
51  $kg/m^2$  and the mean waist circumference was 82.4 cm.

52  
53  
54 Overall, the prevalence of hypertension (defined as  $BP \geq 140/90$ ) increased with age among men  
55  
56 and women. Additionally, women had a higher prevalence of hypertension among nearly all age-groups  
57

1  
2  
3 in both urban and rural areas. The prevalence of hyperglycemia (glucose  $\geq 11.1$  mmol/L) was higher  
4 among urban adults compared to rural across all age groups. The highest prevalence of hyperglycemia  
5 was observed among urban men aged 60-69 years at 18.2%. Finally, the prevalence of overweight and  
6 obesity was higher among urban residents than rural residents. The largest prevalence of overweight and  
7 obesity was observed among urban women, with prevalence as high as 51.4% among women aged 40-49  
8 years (Figure 1).  
9  
10  
11  
12  
13  
14

### 15 16 17 18 Distribution of Cardiovascular Risk

19  
20 We summarized the distribution of CVD risk in the population overall and stratified by sex in  
21 Table 2. Eighty-five percent of participants had a low ( $< 10\%$ ) 10-year CVD risk, and this proportion  
22 was significantly different across sex ( $p < 0.001$ ). Over half (63.7%) of women had a very low ( $< 5\%$ )  
23 cardiovascular risk. Almost all (99.5%) of the study population were categorized as having cardiovascular  
24 risk  $< 20\%$ . A higher proportion of men (1.0%) were categorized as high risk than women (0.1%) ( $p =$   
25  $< 0.001$ ). Overall, only one male participant was categorized as very high risk or with a CVD risk of  $\geq$   
26 30%.  
27  
28  
29  
30  
31  
32  
33

34  
35 We summarized the prevalence of adults with hypertension by CVD risk group (Figure 2).  
36 Among those with 10- $< 20\%$  CVD risk, we observed a high proportion of hypertensive (41.4%). In the  
37 high-risk group ( $\geq 20\%$ ), 100% had hypertension. Additionally, among those with  $\geq 20\%$  CVD risk, we  
38 observed that 35% had severe hypertension (BP  $\geq 160/100$ ).  
39  
40  
41  
42  
43  
44

### 45 Cost of Drug Treatment

46  
47 We were unable to compare the costs of drug treatment at two cardiovascular risk thresholds  
48 (30% to 20%) due to only one male adult with a CVD risk at  $\geq 30\%$ . We observed a low proportion of  
49 adults with CVD risk  $\geq 20\%$  at 0.5%. When we included BP  $\geq 160/100$  measurements, the number of  
50 people requiring treatment more than tripled from 0.5% to 1.8% (Table 3). Conversely, if a single risk  
51 factor approach was applied, and all those with hypertension (a persistent SBP  $\geq 140$  and/or DBP  $\geq 90$ )  
52  
53  
54  
55  
56  
57  
58  
59  
60

1  
2  
3 were treated, 24.6% of the sample would require drug treatment, specifically antihypertensive; more than  
4  
5 20 times the proportion identified when using the total cardiovascular risk approach alone.  
6  
7

### 8 9 Comparison of Cost by Approach

10  
11 Next, we compared the estimated annual cost of medicines per million populations for  
12  
13 implementing the total risk approach vs. the single risk factor approach. Table 4 shows the estimated  
14  
15 number of people aged 40 years or older requiring drug treatment stratified by age group and gender. The  
16  
17 estimates showed that if the single risk factor approach is applied in Bangladesh with its percentage of the  
18  
19 population at risk and the lowest price of medicine in the country, the cost per million populations (aged  
20  
21 40 years or older) of treating those with  $BP \geq 140/90$  would be \$7,111,368 US\$; if the absolute risk  
22  
23 approach were applied, the cost of treating those with a 10-year risk of  $CVD \geq 20\%$  per million  
24  
25 populations (aged 40 years or older) would be \$144,540, almost fifty times less (Figure 3). The cost  
26  
27 estimation was based on the percentage of the population at different levels of risk and the differences in  
28  
29 the price of generic medicines. For this analysis, we focused on the cost of pharmacological treatment as  
30  
31 it is the most critical contributor to the overall direct costs of CVD treatment in Bangladesh. We assumed  
32  
33 that other costs of CVD treatment and prevention service delivery, such as health facilities and wages of  
34  
35 health workers, are similar for both approaches of service delivery(7).  
36  
37  
38  
39  
40

### 41 **Discussion**

42  
43 Using this nationally representative survey of Bangladeshi adults aged 40 years and above, we  
44  
45 found that the majority of adults (97%) were at a very low, low or moderate ten-year risk of myocardial  
46  
47 infarction and stroke. The proportion of adults requiring drug treatment rose from 1.0% to 2.1% when the  
48  
49 threshold for pharmacologic intervention was changed from  $\geq 20\%$  alone to  $\geq 20\%$  plus blood pressure of  
50  
51 160/100, respectively; which was lower the proportion than the single risk factor approach (24.6%). Our  
52  
53 data demonstrate that using a single risk factor approach to manage individual cardiovascular risk factors  
54  
55 is costlier (\$7,111,368 per million population) than using the total risk approach ( $CVD$  risk  $\geq 20$ , \$144,540  
56  
57

1  
2  
3 per million population), as a more substantial proportion of adults will need drug treatment. Findings  
4  
5 from this analysis support the implementation of clinical guidelines using CVD risk scores calculated  
6  
7 using the WHO CVD Risk Prediction Charts to appropriately identify patients at the highest risk of CVD  
8  
9 development over ten years in Bangladesh.  
10

11  
12 In our study using nationally representative data, we found that the 10-year risk of CVD was low  
13  
14 (<10%) among the vast majority of adults (85.1%). Additionally, only 0.5% of adults were at high risk ( $\geq$   
15  
16 20%) of a CVD event within the next ten years. In this analysis, we applied the 2019 CVD Risk Charts  
17  
18 for South Asia, which are newly developed and now incorporate body mass index as part of the prediction  
19  
20 chart algorithm. Our results are comparable to regional data presented in the 2019 Lancet publication by  
21  
22 the WHO CVD Risk Chart Working Group, which showed that 0% of women from Bhutan, Sri Lanka,  
23  
24 and Nepal had a CVD risk level above 20%. Similarly, 0% of men from Bhutan, and only <2% of men  
25  
26 from both Sri Lanka and Nepal were categorized with a risk level above 20%(8). These data demonstrate  
27  
28 a lower prevalence of CVD risk  $\geq$ 20% than prior reports from South Asia, which utilized the original risk  
29  
30 prediction charts published in 2007. For example, prior data from Nepal (20) and Sri Lanka(21) showed  
31  
32 that 4.3% and 8.2% of adults respectively, were categorized with a high ( $\geq$ 20%) 10-year risk of a CVD  
33  
34 event. Further, analyses from a rural area of South India revealed that seventeen percent of participants  
35  
36 had moderate to high risk (10->20%) of cardiovascular events per the 2007 WHO prediction charts(22).  
37  
38 Finally, data collected in 2010 from Pakistan showed that 10% of adults were categorized with  $\geq$ 20%  
39  
40 CVD risk, with 2.9% as high as  $\geq$ 40%(7). When utilizing the 2019 WHO prediction charts on the  
41  
42 population level to measure and monitor trends in total CVD risk in recent years, policy makers in LMICs  
43  
44 should interpret the trends with caution, and assess changes in trends of CVD-risk over time using both  
45  
46 the 2007 and 2019 WHO risk prediction charts for comparison.  
47  
48

49  
50 The WHO CVD Risk Charts were developed for use in LMICs and are now more suitable for use  
51  
52 in these settings due to the inclusion of data from low-resource regions in the risk prediction model  
53  
54 development. While we present the first country-specific analysis using the 2019 risk charts, several prior  
55  
56 studies in LMICs have been conducted using the 2007 risk charts. In other countries in Asia, we observe  
57  
58

1  
2  
3 the prevalence of "high CVD risk" ( $\geq 20\%$ ) of 6.0%, 2.3% and 1.3% in Mongolia, Malaysia and  
4  
5 Cambodia, respectively(23). Mendis *et al* reported the 10 year CVD risk of seven countries and the  
6  
7 majority of these countries reported low CVD risk among its adult populations [China (96.1%) and Sri  
8  
9 Lanka (94.9%), (Iran (93.9%), Cuba (89.7%), Nigeria (86.0%), Georgia (83.1%), and Pakistan  
10  
11 (79.2%)](7). Studies conducted in urban areas of low- and middle-income countries show varying  
12  
13 prevalence of high CVD risk ( $\geq 20\%$ ): for example, one study from Malaysia shows 20.5% of adults were  
14  
15 high-risk of CVD(24), whereas studies from urban Kenya(25) and Sri Lanka(21) reports less than 10% of  
16  
17 their population had high CVD risk. Specifically in Bangladesh, utilizing the 2007 prediction charts,  
18  
19 three prior studies have reported absolute CVD risk among the adult population (10, 26, 27). Fatema et al.  
20  
21 found that 10% of rural Bangladeshi adults were at high risk ( $\geq 20\%$ ) of a CVD event within the next ten  
22  
23 years, and half of these adults fell in the very high-risk category ( $\geq 30\%$ ). In another rural Bangladeshi  
24  
25 population, the proportion of participants at a high-risk ( $\geq 20\%$ ) of a CVD event was 2.1% (26). Finally,  
26  
27 in an urban Bangladeshi population of 150 adults, 3.4% had high CVD risk ( $\geq 20\%$ ), which is lower than  
28  
29 expected as the population was urban(27). No other studies in Bangladesh have been conducted to assess  
30  
31 the 10-year risk of CVD using the WHO CVD Risk Prediction Charts. We present novel data using the  
32  
33 2019 charts and a nationally representative sample, which may be generalizable to the population of  
34  
35 Bangladesh. Data we present may be used to inform policymakers decisions on clinical guidelines and  
36  
37 resource allocation for treatment of CVDs in Bangladesh.  
38  
39  
40

41 Similar to prior analyses conducted using data from eight LMICs (7), our results demonstrate that  
42  
43 in the Bangladeshi context using a single risk factor approach to evaluate the risk of CVD-related  
44  
45 mortality would cost more than implementing the total risk approach due to higher drug costs. In  
46  
47 Bangladesh, about 60% of out-of-pocket costs patients face goes towards drugs directly bought from  
48  
49 pharmacies, diagnostics, and informal providers(28). Currently, Bangladesh does not offer universal  
50  
51 health coverage or affordable health insurance plans. The cost of treatment for CVD frequently leads to  
52  
53 catastrophic health expenditure and impoverishment; the proportion of catastrophic spending for  
54  
55 treatment is highest among those from the lowest quintiles of wealth (14%) compared to those with high  
56  
57  
58  
59  
60

1  
2  
3 wealth and high socioeconomic status (6.6%) (29). As such, implementing the WHO CVD Risk  
4 Prediction Charts may be beneficial to patients in Bangladesh as only those at the highest risk of future  
5 CVD would be recommended for treatment.  
6  
7  
8

9  
10 In addition to benefits to the patient, the total CVD risk approach would also be beneficial to  
11 Bangladesh's health care system by improving NCD preventive service delivery and the use of guidelines  
12 for adequate care. Currently, Bangladesh is categorized by the World Bank as a lower-middle-income  
13 country with emerging health challenges as the burden of NCDs continues to grow. In 2015, an estimated  
14 67% of all deaths in Bangladesh were due to NCDs and the risk of premature death from chronic disease  
15 among adults aged 30-70 years was 22%(30). Indeed, CVDs and circulatory diseases are the leading  
16 cause of mortality and morbidity in Bangladesh. Despite this substantial burden, preventive services for  
17 CVDs in Bangladesh are limited. In 2014, an estimated 16% of health care facilities across the country  
18 (i.e. hospitals, community clinics) had the resources to diagnose, prescribe treatment for, and manage  
19 patients with CVDs(31). District hospitals (95%), Upazila health complexes (81%), and private hospitals  
20 (77%) were more likely to provide services for cardiovascular diseases than other facilities. Only 10% of  
21 community clinics and maternal and child welfare centers, and 17% of union level facilities, which are the  
22 most accessible providers in rural areas, provided any cardiovascular services, and the services at these  
23 facilities were limited to the measurement of blood pressure or referrals(31). Among facilities with the  
24 capacity to offer services for CVD management, about only 20% utilized established guidelines for  
25 hypertension treatment and less than one-third had essential CVD medicines readily available on-site for  
26 patients(31). By integrating the WHO risk prediction charts into the national guidelines for management  
27 of hypertension and CVD prevention in Bangladesh, the proportion of facilities using established  
28 guidelines may increase as the charts are easy to implement, interpret, and access. Additionally, since  
29 only one-third of facilities have essential CVD medicines readily available, distributing pharmacologic  
30 treatment to those at highest risk of premature mortality due to CVD will be crucial.  
31  
32  
33  
34  
35  
36  
37  
38  
39  
40  
41  
42  
43  
44  
45  
46  
47  
48  
49  
50  
51  
52

53  
54 Although the implementation of a total risk approach may lead to cost-savings, there are  
55 limitations to implementing the 2019 CVD Risk Prediction Charts. When compared to the single risk  
56  
57  
58

1  
2  
3 factor approach, the WHO charts categorizes fewer individuals as high-risk and may delay the receipt of  
4 necessary life-saving treatment. For example, the prediction charts may underestimate CVD risk in certain  
5 categories of people such as those with persistent raised blood pressure  $\geq 160/100$  mmHg, blood  
6 cholesterol  $\geq 8$  mmol/L, or those suffering from diabetes with renal disease(5). Patients who may fall in  
7 these categories should be recommended for intensive lifestyle interventions, and appropriate drug  
8 therapy, however, the CVD prediction charts will erroneously deny treatment to these potentially high-  
9 risk adults.. In fact, the risk models used to develop the 2019 CVD risk charts may have underestimated  
10 CVD risk due to limitations in the population data used to estimate incidences: Data used to develop the  
11 predictions models likely included people already on cardiovascular disease prevention therapies, such as  
12 statins, which have led to an underestimate in CVD risk(8). In our study, we underscore the potential for  
13 underestimation of CVD risk by comparing the proportion of adults categorized as high risk ( $\geq 20\%$  CVD  
14 risk) to those who would be diagnosed with hypertension (BP  $\geq 140/60$ ) and severe hypertension (BP  $\geq$   
15 160/100). Additionally, we provided a graphical summary of common risk factors of CVD, including  
16 hypertension, hyperglycemia, and overweight and obesity. Despite our very low proportion of adults who  
17 would be recommended for treatment based on the risk prediction charts, we observed a high prevalence  
18 of these risk factors particularly in urban populations.

19  
20  
21  
22  
23  
24  
25  
26  
27  
28  
29  
30  
31  
32  
33  
34  
35  
36  
37  
38  
39  
40  
41  
42  
43  
44  
45  
46  
47  
48  
49  
50  
51  
52  
53  
54  
55  
56  
57  
58  
59  
60

Limitations of this analytic approach should be considered when interpreting our results. The CVD 10-year risk cut-offs were defined using risk prediction models derived from 85 cohorts mostly from high-income countries, as data from large-scale prospective cohort data from most LMICs are unavailable. Data were used from the Global Burden of Disease (GBD) project to recalibrate the models to be representative of LMICs, however, the GBD data do not have country-specific disease risk estimates. As such, the estimation used from each region's chart will most likely apply to the largest country within each region, or from the country where most of the data originated. The risk prediction charts provide approximate estimates of CVD risk in people who do not have established coronary heart disease, stroke or other atherosclerotic diseases. Although we included simvastatin in our pharmacologic cost analysis, we were unable to measure total cholesterol or confirm the medical history of participants

1  
2  
3 using medical charts and relied on self-report, leading to the potential for measurement error and recall  
4 bias. Additionally, we were unable to categorize participants as diabetic as we did not obtain fasting blood  
5 glucose and were only able to categorize adults as hyperglycemic in our descriptive analysis as we  
6 measured random blood glucose. Further, our data were collected in 2013 and may be outdated as  
7 population growth in older age groups has been observed in recent years. Our analyses should be  
8 replicated using more recent data and future research studies should include the measurement of total  
9 cholesterol. Finally, our cost estimates were based on the prevalence of each risk approach in our study  
10 sample. Although we present the total number of people estimated to require drug treatment using 2013  
11 population data, estimates of only those at risk of their first CVD event were unavailable due to lack of  
12 surveillance data. Nevertheless, our data are valuable as the first analysis to apply the 2019 WHO CVD  
13 risk prediction charts to a cohort of adults in Bangladesh. Additionally, we provide data on the  
14 comparative cost difference of each approach to underscore the potential cost savings in implementing the  
15 total risk approach in Bangladesh. Cost data presented in this analysis may be used in future cost-  
16 effectiveness analyses to compare the total risk and single risk factor approach when considering all costs  
17 from a societal perspective to inform health policy in Bangladesh.

18  
19  
20  
21  
22  
23  
24  
25  
26  
27  
28  
29  
30  
31  
32  
33  
34  
35 The World Health Organization has outlined global targets in the Global Monitoring Framework  
36 for the control of NCDs in LMICs, which prioritizes an 80% of availability of affordable basic  
37 technologies and essential medicines necessary to treat significant NCDs, including CVDs in both rural  
38 and urban areas of the country. Limited CVD treatment access and weak health care infrastructure in  
39 Bangladesh is a significant public health concern. As public financing for health care is limited in  
40 Bangladesh (~1% of gross domestic product or GDP), public health policies on CVD drug treatment  
41 guidelines based on cost estimates, such as out-of-pocket costs is necessary for effective CVD control.  
42 Effective policies should address the potential for overtreatment, which comes at a high cost to both the  
43 health care system and the patient. The high percentage of the Bangladeshi adult population at low 10-  
44 year CVD risk (<10%) highlights the potential for reduction of CVD risk through population-wide public  
45 health policy and availability of accessible preventive services. However, caution should be taken to  
46  
47  
48  
49  
50  
51  
52  
53  
54  
55  
56  
57  
58  
59  
60



1  
2  
3 ensure that risk stratification approaches are not used in inappropriate clinical circumstances, such as  
4  
5 adults with highly uncontrolled hypertension with blood pressure measurements at 160/100 mmHg.  
6  
7

## 8 9 **Conclusion**

10  
11 Our data show that the implementation of a total risk approach compared with a single risk factor  
12  
13 approach will reduce the health care expenditure by lowering drug costs, which accounts for 60% of out-  
14  
15 of-pocket spending in Bangladesh. This approach would be particularly beneficial in Bangladesh, a low-  
16  
17 resource country that should prioritize the development of health policy for effective resource allocation  
18  
19 in the public health sector. Using the total risk approach would increase service coverage and allow for  
20  
21 the distribution of resources to target those at highest risk of experiencing a heart attack or stroke. As the  
22  
23 majority of the Bangladeshi adult population aged  $\geq 40$  years have a low ten-year risk of CVD, strategies  
24  
25 that target those at highest risk of CVD coupled with public health policies to reduce the population-level  
26  
27 risk of CVD may be effective.  
28  
29  
30  
31  
32  
33  
34  
35  
36  
37  
38  
39  
40  
41  
42  
43  
44  
45  
46  
47  
48  
49  
50  
51  
52  
53  
54  
55  
56  
57  
58  
59  
60

## Footnotes

Acknowledgments: The study was completed by the National Institute of Ophthalmology (NIO) of Bangladesh with technical assistance from the WHO Country Office for Bangladesh. The authors are grateful to the management and field team of NIO consisting of ophthalmologists, other doctors, nurses, technologists, and enumerators for their hard works.

Competing Interests: The authors of this study declare no conflict of interest. The authors alone are responsible for the views expressed in this article and they do not necessarily represent the views, decisions or policies of the institutions with which they are affiliated.

Funding: Financial assistance for this study was provided by the WHO Country Office for Bangladesh (WHO Reference: 2013/355662-0, Purchase Order: 200843353, Reg. File: BAN-2013-B7-TSA-0001)

Consent to publish: All authors consent to the publication of this manuscript.

Availability of data and materials: The de-identified participant data used and/or analyzed during the current study are available from the corresponding author on reasonable request. Please contact M. Mostafa Zaman at zamanm@who.int for further information and guidelines.

Authors contributions: JYI: conceptualized the manuscript, analyzed data, interpreted results critically, and drafted the manuscript. MMZ: conceptualized the manuscript, designed the study, interpreted results critically, guided manuscript writing, and critically reviewed it. MM, SAS, AHMEH prepared the survey protocol, trained the field team, implemented the survey, processed the data, and reviewed the manuscript. SAS is the guarantor of data.

**Figures:**

Figure 1: Prevalence of hypertension, hyperglycemia, and overweight and obesity among Bangladeshi adults aged 40 years and above by area of residence and age group

Figure 2: Proportion of adults with hypertension or severe hypertension by CVD risk group

Figure 3: Annual costs of pharmacologic treatment for CVD by sex and risk stratification approach

For peer review only

## References

1. Checkley W, Ghannem H, Irazola V, Kimaiyo S, Levitt NS, Miranda JJ, et al. Management of NCD in low- and middle-income countries. *Global heart*. 2014;9(4):431-43. doi: 10.1016/j.ghart.2014.11.003. PubMed PMID: 25592798; PubMed Central PMCID: PMC4299752.
2. Islam SM, Purnat TD, Phuong NT, Mwingira U, Schacht K, Froschl G. Non-communicable diseases (NCDs) in developing countries: a symposium report. *Globalization and health*. 2014;10:81. doi: 10.1186/s12992-014-0081-9. PubMed PMID: 25498459; PubMed Central PMCID: PMC4267750.
3. Global action plan for the prevention and control of noncommunicable diseases 2013-2020. Geneva, Switzerland: World Health Organization; 2013 [cited 2019 01/10]. Available from: [http://apps.who.int/iris/bitstream/10665/94384/1/9789241506236\\_eng.pdf?ua=1](http://apps.who.int/iris/bitstream/10665/94384/1/9789241506236_eng.pdf?ua=1).
4. NCD Global Monitoring Framework: World Health Organization; 2017 [cited 2017 09/29]. Available from: [http://www.who.int/nmh/global\\_monitoring\\_framework/en/](http://www.who.int/nmh/global_monitoring_framework/en/).
5. Prevention of cardiovascular disease: pocket guidelines for assessment and management of cardiovascular disease Geneva: World Health Organization, 2007.
6. Ndindjock R, Gedeon J, Mendis S, Paccaud F, Bovet P. Potential impact of single-risk-factor versus total risk management for the prevention of cardiovascular events in Seychelles. *Bulletin of the World Health Organization*. 2011;89(4):286-95. doi: 10.2471/BLT.10.082370. PubMed PMID: 21479093; PubMed Central PMCID: PMC3066521.
7. Mendis S, Lindholm LH, Anderson SG, Alwan A, Koju R, Onwubere BJ, et al. Total cardiovascular risk approach to improve efficiency of cardiovascular prevention in resource constrain settings. *Journal of clinical epidemiology*. 2011;64(12):1451-62. doi: 10.1016/j.jclinepi.2011.02.001. PubMed PMID: 21530172.

- 1  
2  
3 8. Group WCRCW. World Health Organization cardiovascular disease risk charts: revised models  
4 to estimate risk in 21 global regions. *The Lancet Global health*. 2019;7(10):e1332-e45. doi:  
5 10.1016/S2214-109X(19)30318-3. PubMed PMID: 31488387.  
6  
7
- 8  
9  
10 9. Fatema K, Zwar NA, Milton AH, Rahman B, Awal AS, Ali L. Cardiovascular risk assessment  
11 among rural population: findings from a cohort study in a peripheral region of Bangladesh. *Public health*.  
12 2016;137:73-80. doi: 10.1016/j.puhe.2016.02.016. PubMed PMID: 27036981.  
13  
14
- 15 10. Fatema K, Zwar NA, Milton AH, Rahman B, Ali L. Application of two versions of the  
16 WHO/international society of hypertension absolute cardiovascular risk assessment tools in a rural  
17 Bangladeshi population. *BMJ open*. 2015;5(10):e008140. doi: 10.1136/bmjopen-2015-008140. PubMed  
18 PMID: 26463220; PubMed Central PMCID: PMC4606419.  
19  
20
- 21 11. Fatema K, Rahman B, Zwar NA, Milton AH, Ali L. Short-term predictive ability of selected  
22 cardiovascular risk prediction models in a rural Bangladeshi population: a case-cohort study. *BMC*  
23 *cardiovascular disorders*. 2016;16(1):105. doi: 10.1186/s12872-016-0279-2. PubMed PMID: 27386836;  
24 PubMed Central PMCID: PMC4937534.  
25  
26
- 27 12. Zaman MM, Rahman MM, Rahman MR, Bhuiyan MR, Karim MN, Chowdhury MA. Prevalence  
28 of risk factors for non-communicable diseases in Bangladesh: Results from STEPS survey 2010. *Indian*  
29 *journal of public health*. 2016;60(1):17-25. doi: 10.4103/0019-557X.177290. PubMed PMID: 26911213;  
30 PubMed Central PMCID: PMC49138.  
31  
32
- 33 13. Rahman M, Zaman MM, Islam JY, Chowdhury J, Ahsan HN, Rahman R, et al. Prevalence,  
34 treatment patterns, and risk factors of hypertension and pre-hypertension among Bangladeshi adults.  
35 *Journal of human hypertension*. 2018;32(5):334-48. doi: 10.1038/s41371-017-0018-x. PubMed PMID:  
36 29230005; PubMed Central PMCID: PMC5860750.  
37  
38  
39  
40  
41  
42  
43  
44  
45  
46  
47  
48  
49  
50  
51  
52  
53  
54  
55  
56  
57  
58  
59  
60

- 1  
2  
3 14. Karim MN, Zaman MM, Rahman MM, Chowdhury MAJ, Ahsan H, Hassan MM, et al.  
4  
5 Sociodemographic Determinants of Low Fruit and Vegetable Consumption Among Bangladeshi Adults:  
6  
7 Results From WHO-STEPs Survey 2010. *Asia-Pacific journal of public health / Asia-Pacific Academic*  
8  
9 Consortium for Public Health. 2017;29(3):189-98. doi: 10.1177/1010539517699059. PubMed PMID:  
10  
11 28434246; PubMed Central PMCID: PMC6349139.  
12  
13  
14  
15 15. Surveillance of risk factors for noncommunicable disease: the WHO STEPwise approach.  
16  
17 Geneva: World Health Organization, 2001.  
18  
19  
20 16. Population and Housing Census 2001, updated in 2009 Dhaka, Bangladesh: Bangladesh Bureau  
21  
22 of Statistics 2009 [cited 2019 01/10]. Available from:  
23  
24 <http://microdata.worldbank.org/index.php/catalog/1616>.  
25  
26  
27 17. Global report on diabetes Geneva, Switzerland: World Health Organization 2016. Available  
28  
29 from: <https://www.who.int/diabetes/global-report/en/>.  
30  
31  
32 18. Mendis S, Lindholm LH, Mancia G, Whitworth J, Alderman M, Lim S, et al. World Health  
33  
34 Organization (WHO) and International Society of Hypertension (ISH) risk prediction charts: assessment  
35  
36 of cardiovascular risk for prevention and control of cardiovascular disease in low and middle-income  
37  
38 countries. *Journal of hypertension*. 2007;25(8):1578-82. doi: 10.1097/HJH.0b013e3282861fd3. PubMed  
39  
40 PMID: 17620952.  
41  
42  
43  
44 19. Population Projection of Bangladesh Dynamics and Trends 2011-2061 Dhaka, Bangladesh  
45  
46 Bangladesh Bureau of Statistics 2015 [cited 2018 11/17]. Available from:  
47  
48 [http://203.112.218.65:8008/WebTestApplication/userfiles/Image/PopMonographs/PopulationProjection.p](http://203.112.218.65:8008/WebTestApplication/userfiles/Image/PopMonographs/PopulationProjection.pdf)  
49  
50 [df](http://203.112.218.65:8008/WebTestApplication/userfiles/Image/PopMonographs/PopulationProjection.pdf).  
51  
52  
53 20. Khanal MK, Ahmed MS, Moniruzzaman M, Banik PC, Dhungana RR, Bhandari P, et al. Total  
54  
55 cardiovascular risk for next 10 years among rural population of Nepal using WHO/ISH risk prediction  
56  
57  
58  
59  
60

1  
2  
3 chart. BMC research notes. 2017;10(1):120. doi: 10.1186/s13104-017-2436-9. PubMed PMID:  
4  
5 28270186; PubMed Central PMCID: PMC5341399.  
6  
7

8 21. Ranawaka UK, Wijekoon CN, Pathmeswaran A, Kasturiratne A, Gunasekera D, Chackrewarthy  
9 S, et al. Risk estimates of cardiovascular diseases in a Sri Lankan community. Ceylon Med J.  
10  
11 2016;61(1):11-7. doi: 10.4038/cmj.v61i1.8253. PubMed PMID: 27031973.  
12  
13  
14

15 22. Ghorpade AG, Shrivastava SR, Kar SS, Sarkar S, Majgi SM, Roy G. Estimation of the  
16  
17 cardiovascular risk using World Health Organization/International Society of Hypertension (WHO/ISH)  
18  
19 risk prediction charts in a rural population of South India. Int J Health Policy Manag. 2015;4(8):531-6.  
20  
21 doi: 10.15171/ijhpm.2015.88. PubMed PMID: 26340393; PubMed Central PMCID: PMC4529043.  
22  
23  
24

25 23. Ogtontuya D, Oum S, Buckley BS, Bonita R. Assessment of total cardiovascular risk using  
26  
27 WHO/ISH risk prediction charts in three low and middle income countries in Asia. BMC public health.  
28  
29 2013;13:539. doi: 10.1186/1471-2458-13-539. PubMed PMID: 23734670; PubMed Central PMCID:  
30  
31 PMC3679976.  
32  
33

34 24. Su TT, Amiri M, Mohd Hairi F, Thangiah N, Bulgiba A, Majid HA. Prediction of cardiovascular  
35  
36 disease risk among low-income urban dwellers in metropolitan Kuala Lumpur, Malaysia. BioMed  
37  
38 research international. 2015;2015:516984. doi: 10.1155/2015/516984. PubMed PMID: 25821810;  
39  
40 PubMed Central PMCID: PMC4363497.  
41  
42  
43

44 25. Vusirikala A, Wekesah F, Kyobutungi C, Oyebode O. Assessment of cardiovascular risk in a  
45  
46 slum population in Kenya: use of World Health Organisation/International Society of Hypertension  
47  
48 (WHO/ISH) risk prediction charts - secondary analyses of a household survey. BMJ open.  
49  
50 2019;9(9):e029304. doi: 10.1136/bmjopen-2019-029304. PubMed PMID: 31488481; PubMed Central  
51  
52 PMCID: PMC6731939.  
53  
54  
55  
56  
57  
58  
59  
60

- 1  
2  
3 26. Cravedi P, Sharma SK, Bravo RF, Islam N, Tchokhonelidze I, Ghimire M, et al. Preventing renal  
4 and cardiovascular risk by renal function assessment: insights from a cross-sectional study in low-income  
5 countries and the USA. *BMJ open*. 2012;2(5). doi: 10.1136/bmjopen-2012-001357. PubMed PMID:  
6 23002161; PubMed Central PMCID: PMC3467605.  
7  
8  
9  
10  
11  
12 27. Ahmed MSAM, Moniruzzaman M, Chowdhury S, Banik PC. Cardiovascular Risk Assessment  
13 Among Urban Population of Bangladesh Using WHO/ISH Risk Prediction Chart. *International journal of*  
14 *epidemiology*. 2015;44(suppl\_1):i202-i. doi: 10.1093/ije/dyv096.327.  
15  
16  
17  
18  
19  
20 28. Multisectoral Action Plan for the Noncommunicable Disease Control and Prevention (2016-  
21 2021) Dhaka, Bangladesh: Ministry of Health and Family Welfare, Government of the People's Republic  
22 Bangladesh.; 2015 [cited 2018 12/15]. Available from:  
23  
24 [http://www.searo.who.int/entity/ncd\\_tobacco\\_surveillance/monitoring\\_fw/pages\\_from\\_ban\\_ncd\\_action\\_p](http://www.searo.who.int/entity/ncd_tobacco_surveillance/monitoring_fw/pages_from_ban_ncd_action_p)  
25 [lan\\_2016\\_2021\\_me\\_not\\_approved.pdf](http://www.searo.who.int/entity/ncd_tobacco_surveillance/monitoring_fw/pages_from_ban_ncd_action_p).  
26  
27  
28  
29  
30  
31 29. Health and Morbidity Status Survey-2012 Dhaka, Bangladesh: Bangladesh Bureau of Statistics,  
32 Ministry of Planning.; 2013 [cited 2018 12/25]. Available from:  
33  
34 [http://bbs.portal.gov.bd/sites/default/files/files/bbs.portal.gov.bd/page/4c7eb0f0\\_e780\\_4686\\_b546\\_b4fa0](http://bbs.portal.gov.bd/sites/default/files/files/bbs.portal.gov.bd/page/4c7eb0f0_e780_4686_b546_b4fa0)  
35 [a8889a5/HMSS.pdf](http://bbs.portal.gov.bd/sites/default/files/files/bbs.portal.gov.bd/page/4c7eb0f0_e780_4686_b546_b4fa0).  
36  
37  
38  
39  
40  
41 30. Noncommunicable Diseases Progress Monitor 2017 Geneva, Switzerland: World Health  
42 Organization; 2017 [cited 2019 02/15]. 231]. Available from: <https://www.who.int/nmh/publications/ncd->  
43 [progress-monitor-2017/en/](https://www.who.int/nmh/publications/ncd-).  
44  
45  
46  
47  
48 31. NIPORT. Bangladesh Health Facility Survey 2014 Dhaka, Bangladesh: National Institute of  
49 Population Research and Training (NIPORT), Associates for Community and Population Research  
50 (ACPR), and ICF International. ; 2016 [cited 2019 03/15]. Available from:  
51 <https://dhsprogram.com/pubs/pdf/SPA23/SPA23.pdf>.  
52  
53  
54  
55  
56  
57  
58  
59  
60



1  
2  
3  
4  
5  
6  
7  
8  
9  
10  
11  
12  
13  
14  
15  
16  
17  
18  
19  
20  
21  
22  
23  
24  
25  
26  
27  
28  
29  
30  
31  
32  
33  
34  
35  
36  
37  
38  
39  
40  
41  
42  
43  
44  
45  
46  
47  
48  
49  
50  
51  
52  
53  
54  
55  
56  
57  
58  
59  
60

For peer review only

**Table 1: Background Characteristics of Bangladeshi Adult Participants (n = 6189)**

| Characteristics                               | Total (n = 6189) |      |      | Men (n = 2824) |              |      | Women (n = 3365) |              |      |
|-----------------------------------------------|------------------|------|------|----------------|--------------|------|------------------|--------------|------|
|                                               | Mean (SD)        | n    | %    | Mean (SD)      | n            | %    | Mean (SD)        | n            | %    |
| Age (years)                                   | 52.9 (9.9)       |      |      | 53.5 (10.1)    |              |      | 52.5 (9.8)       |              |      |
| Education (years)                             | 3.1 (4.2)        |      |      | 4.3 (4.8)      |              |      | 2.1 (3.3)        |              |      |
| Area of Residence                             |                  |      |      |                |              |      |                  |              |      |
| Urban                                         |                  | 1873 | 30.2 |                | 808          | 28.6 |                  | 1065         | 31.6 |
| Rural                                         |                  | 4316 | 69.8 |                | 2016         | 71.4 |                  | 2300         | 68.4 |
| Occupation                                    |                  |      |      |                |              |      |                  |              |      |
| Professional employment <sup>‡</sup>          |                  | 1007 | 16.3 |                | 880          | 31.3 |                  | 127          | 3.8  |
| Industrial worker/Day Laborer                 |                  | 1600 | 25.9 |                | 1440         | 51.2 |                  | 160          | 4.8  |
| Housework                                     |                  | 2697 | 43.7 |                | -            | -    |                  | 2697         | 80.3 |
| Unemployed/Retired                            |                  | 735  | 11.9 |                | 386          | 13.7 |                  | 349          | 10.4 |
| Other <sup>§</sup>                            |                  | 131  | 2.1  |                | 106          | 3.8  |                  | 25           | 0.7  |
| Smoking Tobacco Use <sup>  </sup>             |                  |      |      |                |              |      |                  |              |      |
| Current User                                  |                  | 1493 | 24.2 |                | 1432         | 50.7 |                  | 61           | 1.8  |
| Ever User                                     |                  | 2261 | 36.5 |                | 2150         | 76.1 |                  | 111          | 3.3  |
| Smokeless Tobacco Use <sup>◇</sup>            |                  |      |      |                |              |      |                  |              |      |
| Current User                                  |                  | 3078 | 49.7 |                | 1208         | 42.8 |                  | 1870         | 55.6 |
| Ever User                                     |                  | 3469 | 56.1 |                | 1433         | 50.7 |                  | 2046         | 60.5 |
| Alcohol use in the last 30 days               |                  |      |      |                |              |      |                  |              |      |
| Yes                                           |                  | 75   | 1.2  |                | 68           | 2.4  |                  | 7            | 0.2  |
| Body Mass Index <sup>¶</sup>                  | 21.9 (4.1)       |      |      |                | 21.4 (3.7)   |      |                  | 22.3 (4.4)   |      |
| Waist Circumference <sup>**</sup> (cm)        | 82.4 (13.3)      |      |      |                | 81.8 (10.5)  |      |                  | 82.8 (15.2)  |      |
| Blood Pressure                                |                  |      |      |                |              |      |                  |              |      |
| Systolic Blood Pressure <sup>††</sup> (mmHg)  | 119.7 (15.2)     |      |      |                | 119.8 (14.9) |      |                  | 119.7 (15.5) |      |
| Diastolic Blood Pressure <sup>††</sup> (mmHg) | 80.3 (9.5)       |      |      |                | 80.2 (9.4)   |      |                  | 80.3 (9.7)   |      |
| Blood Glucose Levels <sup>§§</sup> (mmol/L)   | 6.9 (3.0)        |      |      |                | 6.9 (3.0)    |      |                  | 6.9 (2.9)    |      |

Abbreviations: SD: Standard Deviation; CM: centimeters; mmHg: millimeter of mercury; mmol/L: millimoles per liter

<sup>‡</sup>Professional occupation includes: Government employee, private company employee, businessman

<sup>§</sup>Other occupation includes: Shop keeper, weavers, driver, student, beggar, cook, carpenter, and tailor

<sup>||</sup>Excluding smokeless tobacco | Missing values, n = 18; Men, n = 11; Women, n = 7

<sup>◇</sup>Smokeless tobacco use includes jorda, white leaf (shaada pata), gul, etc.

<sup>¶</sup>Body mass index (BMI) calculated by weight in kilogram divided by height in meter squared

**Table 2: Ten-year risk of combined myocardial infarction and stroke (fatal and non-fatal) by gender, using the 2019 WHO CVD Risk non-laboratory based charts for South Asia (n = 5977)**

|                           | Total (n = 5977) |      |           | Men (n = 2708) |      |           | Women (n = 3269) |      |           | P*     |
|---------------------------|------------------|------|-----------|----------------|------|-----------|------------------|------|-----------|--------|
|                           | n                | %    | CI        | n              | %    | CI        | n                | %    | CI        |        |
| Very Low Risk (<5%)       | 3115             | 52.1 | 50.8-53.4 | 1034           | 38.2 | 36.6-40.0 | 2081             | 63.7 | 62.0-65.3 | <0.001 |
| Low Risk ( 5-10 %)        | 1972             | 33.0 | 31.8-34.2 | 1047           | 38.7 | 36.8-40.5 | 925              | 28.3 | 26.8-30.0 | <0.001 |
| Moderate Risk (10 - <20%) | 860              | 14.4 | 13.5-15.3 | 600            | 22.2 | 20.6-23.8 | 260              | 7.8  | 7.0-8.9   | <0.001 |
| High Risk (20 - <30%)     | 29               | 0.5  | 0.3-0.7   | 26             | 1.0  | 0.6-1.4   | 3                | 0.1  | 0.0-0.2   | <0.001 |
| Very High Risk (≥ 30%)    | 1                | 0.0  | 0.0-0.01  | 1              | 0.0  | 0.0-0.1   | 0                | 0.0  | 0.0-0.0   | 0.272  |

Abbreviations: CI, confidence interval; WHO, World Health Organization; CVD, Cardiovascular disease

\* P-value based on chi-square test

For peer review only

**Table 3: Estimation of percentage of population requiring drug treatment based on total risk approach in comparison to single risk factor approaches (n = 5977)**

|       | Cardiovascular Risk $\geq$ 20% |                                           | Single Risk Factor Approach                                   |
|-------|--------------------------------|-------------------------------------------|---------------------------------------------------------------|
|       | CV Risk $\geq$ 20% alone,<br>% | CV Risk $\geq$ 20% +<br>BP $\geq$ 160/100 | BP $\geq$ 140/90 (SBP $\geq$ 140 + isolated<br>raised DBP), % |
| Men   | 1.0                            | 2.1                                       | 22.1                                                          |
| Women | 0.1                            | 1.6                                       | 26.7                                                          |
| Total | 0.5                            | 1.8                                       | 24.6                                                          |

Abbreviations: CV, cardiovascular; BP, blood pressure; SBP, systolic blood pressure; DBP, diastolic blood pressure

**Table 4: Population projections and comparison of medicine costs (US\$) for implementing total risk approach vs. single risk factor approach in Bangladesh**

| Estimated annual total cost of CVD medication treatment per million population† |                                                               |                                                                  |                                                                        |                                                                |             |             |                     |               |               |
|---------------------------------------------------------------------------------|---------------------------------------------------------------|------------------------------------------------------------------|------------------------------------------------------------------------|----------------------------------------------------------------|-------------|-------------|---------------------|---------------|---------------|
| <b>Total risk approach CV Risk ≥ 20% alone</b>                                  |                                                               |                                                                  |                                                                        |                                                                |             |             |                     |               |               |
|                                                                                 | Total no. of people in the general population (in thousands)* | Percentage of population aged ≥40 years requiring medication (%) | Total no. of people estimated to require drug treatment (in thousands) | No. of people per million population (aged 40 years and older) | Aspirin     | Enalapril   | Hydrochlorothiazide | Simvastatin   | Total         |
| <b>Age Group</b>                                                                |                                                               |                                                                  |                                                                        |                                                                |             |             |                     |               |               |
| <b>Men</b>                                                                      |                                                               |                                                                  |                                                                        |                                                                |             |             |                     |               |               |
| 40 to 49                                                                        | 9210                                                          | 0.4                                                              | 3660                                                                   | 4000                                                           | \$6,570.0   | \$34,748.0  | \$12,118.0          | \$62,196.0    | \$115,632.0   |
| 50 to 59                                                                        | 6303                                                          | 0.1                                                              | 596                                                                    | 1000                                                           | \$1,642.5   | \$8,687.0   | \$3,029.5           | \$15,549.0    | \$28,908.0    |
| 60 to 69                                                                        | 3730                                                          | 1.5                                                              | 4733                                                                   | 15000                                                          | \$24,637.5  | \$130,305.0 | \$45,442.5          | \$233,235.0   | \$433,620.0   |
| ≥ 70                                                                            | 1881                                                          | 7.0                                                              | 17507                                                                  | 70000                                                          | \$114,975.0 | \$608,090.0 | \$212,065.0         | \$1,088,430.0 | \$2,023,560.0 |
| Total                                                                           | 21124                                                         | 1.0                                                              | 20769                                                                  | 10000                                                          | \$16,425.0  | \$86,870.0  | \$30,295.0          | \$155,490.0   | \$289,080.0   |
| <b>Women</b>                                                                    |                                                               |                                                                  |                                                                        |                                                                |             |             |                     |               |               |
| 40 to 49                                                                        | 9087                                                          | 0.0                                                              | 0                                                                      | 0                                                              | \$0.0       | \$0.0       | \$0.0               | \$0.0         | \$0.0         |
| 50 to 59                                                                        | 5662                                                          | 0.0                                                              | 0                                                                      | 0                                                              | \$0.0       | \$0.0       | \$0.0               | \$0.0         | \$0.0         |
| 60 to 69                                                                        | 3257                                                          | 0.0                                                              | 0                                                                      | 0                                                              | \$0.0       | \$0.0       | \$0.0               | \$0.0         | \$0.0         |
| ≥ 70                                                                            | 1638                                                          | 1.6                                                              | 3965                                                                   | 16000                                                          | \$26,280.0  | \$138,992.0 | \$48,472.0          | \$248,784.0   | \$462,528.0   |
| Total                                                                           | 19644                                                         | 0.1                                                              | 1958                                                                   | 1000                                                           | \$1,642.5   | \$8,687.0   | \$3,029.5           | \$15,549.0    | \$28,908.0    |
| <b>All</b>                                                                      |                                                               |                                                                  |                                                                        |                                                                |             |             |                     |               |               |
| 40 to 49                                                                        | 18296                                                         | 0.2                                                              | 3605                                                                   | 2000                                                           | \$3,285.0   | \$17,374.0  | \$6,059.0           | \$31,098.0    | \$57,816.0    |
| 50 to 59                                                                        | 11965                                                         | 0.1                                                              | 1134                                                                   | 1000                                                           | \$1,642.5   | \$8,687.0   | \$3,029.5           | \$15,549.0    | \$28,908.0    |
| 60 to 69                                                                        | 6989                                                          | 0.7                                                              | 4206                                                                   | 7000                                                           | \$11,497.5  | \$60,809.0  | \$21,206.5          | \$108,843.0   | \$202,356.0   |
| ≥ 70                                                                            | 3518                                                          | 4.3                                                              | 21410                                                                  | 43000                                                          | \$70,627.5  | \$373,541.0 | \$130,268.5         | \$668,607.0   | \$1,243,044.0 |
| Total                                                                           | 40768                                                         | 0.5                                                              | 20175                                                                  | 5000                                                           | \$8,212.5   | \$43,435.0  | \$15,147.5          | \$77,745.0    | \$144,540.0   |

---

**Single Risk Factor Approach: BP  $\geq$  140/90 (SBP  $\geq$  140 + isolated raised DBP), %**


---

|                  | Total no. of people in the general population (in thousands)* | Percentage of population aged $\geq$ 40 years requiring medication (%) | Total no. of people estimated to require drug treatment (in thousands) | No. of people per million population (aged 40 years and older) | Aspirin     | Enalapril     | Hydrochlorothiazide | Simvastatin   | Total         |
|------------------|---------------------------------------------------------------|------------------------------------------------------------------------|------------------------------------------------------------------------|----------------------------------------------------------------|-------------|---------------|---------------------|---------------|---------------|
| <b>Age Group</b> |                                                               |                                                                        |                                                                        |                                                                |             |               |                     |               |               |
| <b>Men</b>       |                                                               |                                                                        |                                                                        |                                                                |             |               |                     |               |               |
| 40 to 49         | 9210                                                          | 17.1                                                                   | 156482                                                                 | 171000                                                         | \$280,867.5 | \$1,485,477.0 | \$518,044.5         | \$2,658,879.0 | \$4,943,268.0 |
| 50 to 59         | 6303                                                          | 21.7                                                                   | 129375                                                                 | 217000                                                         | \$356,422.5 | \$1,885,079.0 | \$657,401.5         | \$3,374,133.0 | \$6,273,036.0 |
| 60 to 69         | 3730                                                          | 30.5                                                                   | 96228                                                                  | 305000                                                         | \$500,962.5 | \$2,649,535.0 | \$923,997.5         | \$4,742,445.0 | \$8,816,940.0 |
| $\geq$ 70        | 1881                                                          | 29.4                                                                   | 73529                                                                  | 294000                                                         | \$482,895.0 | \$2,553,978.0 | \$890,673.0         | \$4,571,406.0 | \$8,498,952.0 |
| Total            | 21124                                                         | 22.1                                                                   | 458995                                                                 | 221000                                                         | \$362,992.5 | \$1,919,827.0 | \$669,519.5         | \$3,436,329.0 | \$6,388,668.0 |
| <b>Women</b>     |                                                               |                                                                        |                                                                        |                                                                |             |               |                     |               |               |
| 40 to 49         | 9087                                                          | 22.5                                                                   | 199643                                                                 | 225000                                                         | \$369,562.5 | \$1,954,575.0 | \$681,637.5         | \$3,498,525.0 | \$6,504,300.0 |
| 50 to 59         | 5662                                                          | 30.6                                                                   | 164475                                                                 | 306000                                                         | \$502,605.0 | \$2,658,222.0 | \$927,027.0         | \$4,757,994.0 | \$8,845,848.0 |
| 60 to 69         | 3257                                                          | 28.7                                                                   | 81881                                                                  | 287000                                                         | \$471,397.5 | \$2,493,169.0 | \$869,466.5         | \$4,462,563.0 | \$8,296,596.0 |
| $\geq$ 70        | 1638                                                          | 33.7                                                                   | 83509                                                                  | 337000                                                         | \$553,522.5 | \$2,927,519.0 | \$1,020,941.5       | \$5,240,013.0 | \$9,741,996.0 |
| Total            | 19644                                                         | 26.7                                                                   | 522759                                                                 | 267000                                                         | \$438,547.5 | \$2,319,429.0 | \$808,876.5         | \$4,151,583.0 | \$7,718,436.0 |
| <b>All</b>       |                                                               |                                                                        |                                                                        |                                                                |             |               |                     |               |               |
| 40 to 49         | 18296                                                         | 20.2                                                                   | 364085                                                                 | 202000                                                         | \$331,785.0 | \$1,754,774.0 | \$611,959.0         | \$3,140,898.0 | \$5,839,416.0 |
| 50 to 59         | 11965                                                         | 26.3                                                                   | 298189                                                                 | 263000                                                         | \$431,977.5 | \$2,284,681.0 | \$796,758.5         | \$4,089,387.0 | \$7,602,804.0 |
| 60 to 69         | 6989                                                          | 29.5                                                                   | 177236                                                                 | 295000                                                         | \$484,537.5 | \$2,562,665.0 | \$893,702.5         | \$4,586,955.0 | \$8,527,860.0 |
| $\geq$ 70        | 3518                                                          | 31.6                                                                   | 157336                                                                 | 316000                                                         | \$519,030.0 | \$2,745,092.0 | \$957,322.0         | \$4,913,484.0 | \$9,134,928.0 |
| Total            | 40768                                                         | 24.6                                                                   | 992585                                                                 | 246000                                                         | \$404,055.0 | \$2,137,002.0 | \$745,257.0         | \$3,825,054.0 | \$7,111,368.0 |

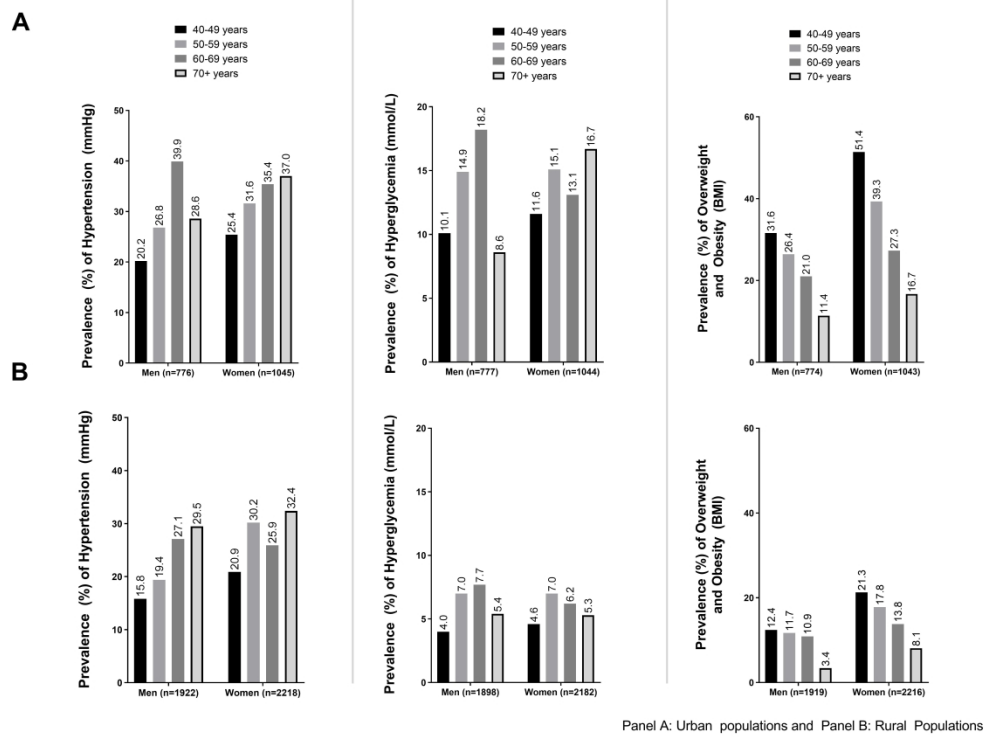

Panel A: Urban populations and Panel B: Rural Populations

Figure 1: Prevalence of hypertension, hyperglycemia, and overweight and obesity among Bangladeshi adults aged 40 years and above by area of residence and age group.

281x220mm (600 x 600 DPI)

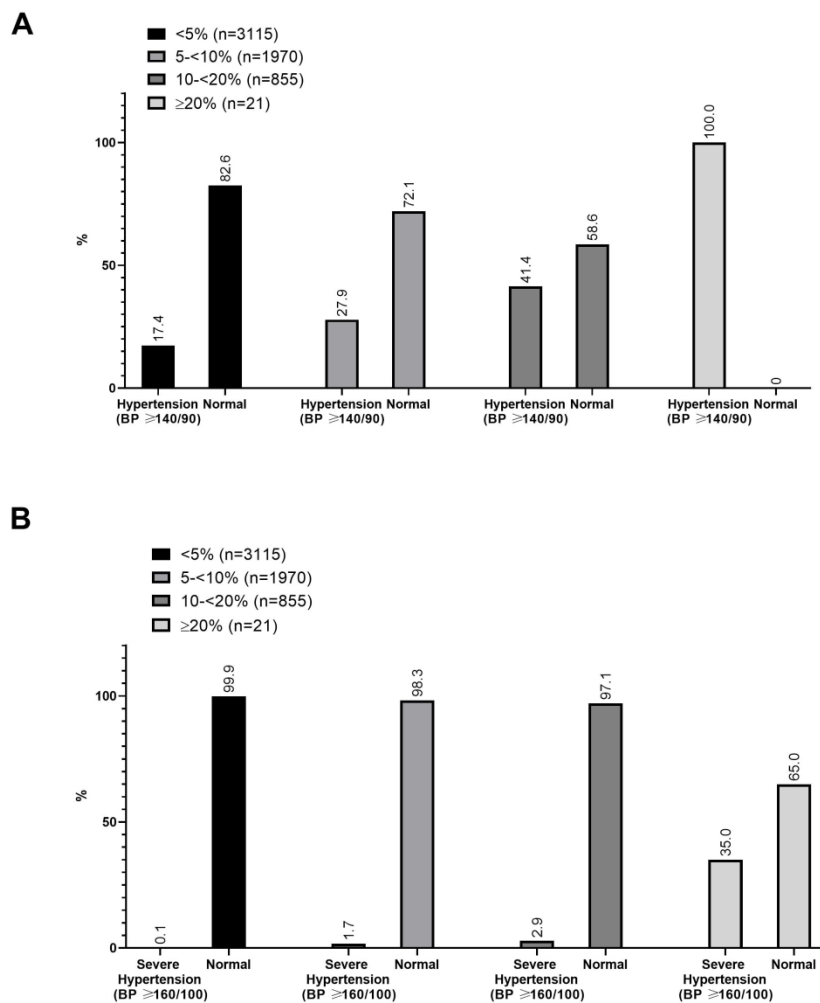

Panel A: % of adults with hypertension by CVD Risk Group  
 Panel B: % of adults with severe hypertension by CVD Risk Group

Figure 2: Proportion of adults with hypertension or severe hypertension by CVD risk group

205x276mm (300 x 300 DPI)



1  
2  
3  
4  
5  
6  
7  
8  
9  
10  
11  
12  
13  
14  
15  
16  
17  
18  
19  
20  
21  
22  
23  
24  
25  
26  
27  
28  
29  
30  
31  
32  
33  
34  
35  
36  
37  
38  
39  
40  
41  
42  
43  
44  
45  
46  
47  
48  
49  
50  
51  
52  
53  
54  
55  
56  
57  
58  
59  
60

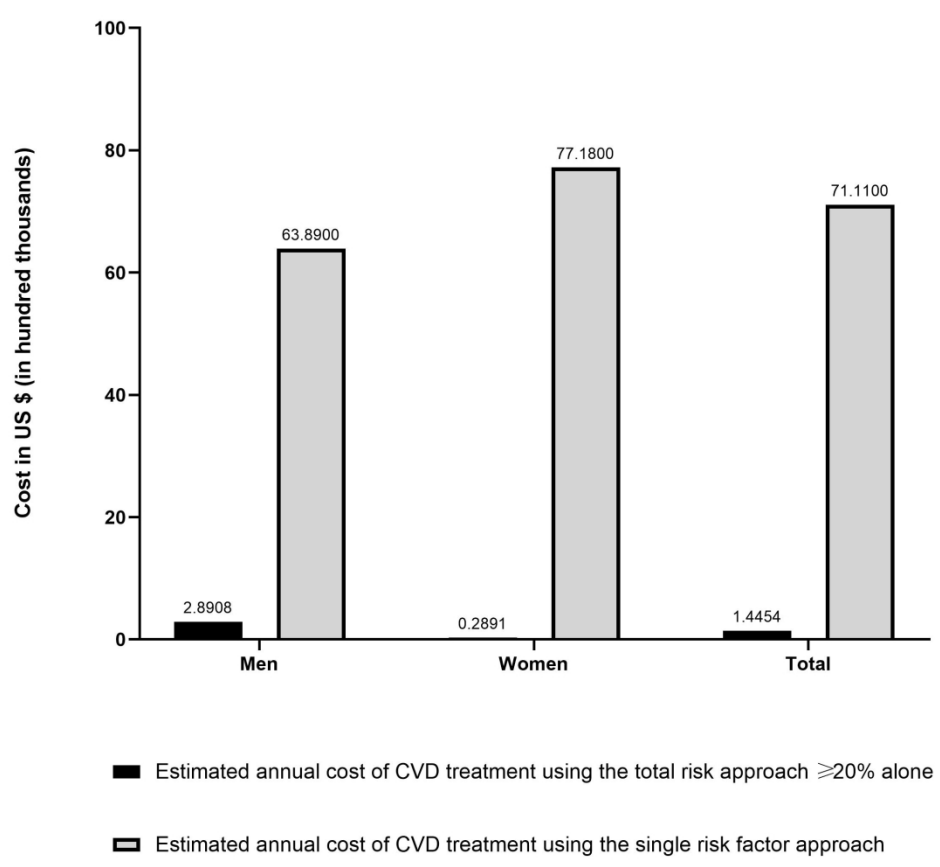

Figure 3: Annual costs of pharmacologic treatment for CVD by sex and risk stratification approach  
199x175mm (300 x 300 DPI)

**Appendix Table 1: Cost of common drugs used to treat cardiovascular disease in Bangladesh (converted to US\$)**

| Drug Name                 | Dose   | Number of Tablets | Category                                                    | Median price (in Bangladeshi Taka) | Price (in US\$)* |
|---------------------------|--------|-------------------|-------------------------------------------------------------|------------------------------------|------------------|
| Aspirin                   | 100 mg | 100 tablets       | Antiplatelet drugs                                          | 38BDT                              | 0.45             |
| Atenolol                  | 50 mg  | 100 tablets       | Antihypertensive, Beta-adrenoreceptor blocking drugs        | 77BDT                              | 0.92             |
| Captopril                 | 25 mg  | 100 tablets       | Antihypertensive, ACE inhibitors                            | 300 BDT                            | 3.58             |
| Chlorthalidone            | 25 mg  | 30 tablets        | Antihypertensive, thiazide diuretics                        | 60 BDT                             | 0.72             |
| Enalapril                 | 10 mg  | 100 tablets       | Antihypertensive, ACE inhibitors                            | 200 BDT                            | 2.38             |
| Frusemide                 | 40 mg  | 100 tablets       | Antihypertensive, loop diuretics                            | 53 BDT                             | 0.63             |
| Hydrochlorothiazide       | 25 mg  | 100 tablets       | Antihypertensive, thiazide diuretics                        | 70 BDT                             | 0.83             |
| Isosorbide dinitrate      | 10 mg  | 100 tablets       | Angina treatment, nitrates - coronary vasodilators          | 35 BDT                             | 0.42             |
| Labetalol                 | 100 mg | 60 tablets        | Antihypertensive, Beta-adrenoreceptor blocking drugs        | 361.2 BDT                          | 4.31             |
| Losartan                  | 50 mg  | 100 tablets       | Antihypertensive, Angiotensin-II receptor blocker           | 600 BDT                            | 7.15             |
| Lovastatine               | 20 mg  | 30 tablets        | Lipid regulation, statin                                    | 303.3 BDT                          | 3.62             |
| Methyldopa                | 250 mg | 100 tables        | Antihypertensive, Centrally acting or central sympatholytic | 308 BDT                            | 3.67             |
| Nifedipine (slow release) | 20 mg  | 100 tablets       | Angina treatment, calcium-channel blocker                   | 64 BDT                             | 0.76             |
| Propranolol hydrochloride | 10 mg  | 100 tablets       | Antihypertensive, Beta-adrenoreceptor blocking drugs        | 24 BDT                             | 0.29             |
| Simvastatine              | 10 mg  | 30 tablets        | Lipid regulation, statin                                    | 360 BDT                            | 4.29             |

1  
2  
3  
4  
5  
6  
7  
8  
9  
10  
11  
12  
13  
14  
15  
16  
17  
18  
19  
20  
21  
22  
23  
24  
25  
26  
27  
28  
29  
30  
31  
32  
33  
34  
35  
36  
37  
38  
39  
40  
41  
42  
43  
44  
45  
46

|                |                       |             |                                                                        |          |       |
|----------------|-----------------------|-------------|------------------------------------------------------------------------|----------|-------|
| Spironolactone | 25 mg                 | 100 tablets | Antihypertensive, potassium-sparing diuretics & aldosterone antagonist | 202 BDT  | 2.41  |
| Streptokinase  | 1.5 million unit/vial | One vial    | Anticoagulant                                                          | 3100 BDT | 36.96 |
| Warfarin       | 5 mg                  | 100 tablets | Anticoagulant                                                          | 300 BDT  | 3.58  |

Abbreviations: mg, milligrams; US, United States; BDT, Bangladeshi Taka

\*Price conversion based on exchange rate on 02/07/2019

For peer review only

**STROBE 2007 (v4) Statement—Checklist of items that should be included in reports of *cross-sectional studies***

| Section/Topic                | Item # | Recommendation                                                                                                                                                                       | Reported on page # |
|------------------------------|--------|--------------------------------------------------------------------------------------------------------------------------------------------------------------------------------------|--------------------|
| <b>Title and abstract</b>    | 1      | (a) Indicate the study's design with a commonly used term in the title or the abstract                                                                                               | 2                  |
|                              |        | (b) Provide in the abstract an informative and balanced summary of what was done and what was found                                                                                  | 2-3                |
| <b>Introduction</b>          |        |                                                                                                                                                                                      |                    |
| Background/rationale         | 2      | Explain the scientific background and rationale for the investigation being reported                                                                                                 | 5-6                |
| Objectives                   | 3      | State specific objectives, including any prespecified hypotheses                                                                                                                     | 6                  |
| <b>Methods</b>               |        |                                                                                                                                                                                      |                    |
| Study design                 | 4      | Present key elements of study design early in the paper                                                                                                                              | 6                  |
| Setting                      | 5      | Describe the setting, locations, and relevant dates, including periods of recruitment, exposure, follow-up, and data collection                                                      | 7                  |
| Participants                 | 6      | (a) Give the eligibility criteria, and the sources and methods of selection of participants                                                                                          | 6                  |
| Variables                    | 7      | Clearly define all outcomes, exposures, predictors, potential confounders, and effect modifiers. Give diagnostic criteria, if applicable                                             | 8-10               |
| Data sources/<br>measurement | 8*     | For each variable of interest, give sources of data and details of methods of assessment (measurement). Describe comparability of assessment methods if there is more than one group | 7-10               |
| Bias                         | 9      | Describe any efforts to address potential sources of bias                                                                                                                            | 6-7 & 15-16        |
| Study size                   | 10     | Explain how the study size was arrived at                                                                                                                                            | 7                  |
| Quantitative variables       | 11     | Explain how quantitative variables were handled in the analyses. If applicable, describe which groupings were chosen and why                                                         | 9-10               |
| Statistical methods          | 12     | (a) Describe all statistical methods, including those used to control for confounding                                                                                                | 9-10               |
|                              |        | (b) Describe any methods used to examine subgroups and interactions                                                                                                                  | 8-11               |
|                              |        | (c) Explain how missing data were addressed                                                                                                                                          | 9                  |
|                              |        | (d) If applicable, describe analytical methods taking account of sampling strategy                                                                                                   | N/A                |
|                              |        | (e) Describe any sensitivity analyses                                                                                                                                                | N/A                |
| <b>Results</b>               |        |                                                                                                                                                                                      |                    |

|                          |     |                                                                                                                                                                                                              |       |
|--------------------------|-----|--------------------------------------------------------------------------------------------------------------------------------------------------------------------------------------------------------------|-------|
| Participants             | 13* | (a) Report numbers of individuals at each stage of study—eg numbers potentially eligible, examined for eligibility, confirmed eligible, included in the study, completing follow-up, and analysed            | 10    |
|                          |     | (b) Give reasons for non-participation at each stage                                                                                                                                                         | N/A   |
|                          |     | (c) Consider use of a flow diagram                                                                                                                                                                           | N/A   |
| Descriptive data         | 14* | (a) Give characteristics of study participants (eg demographic, clinical, social) and information on exposures and potential confounders                                                                     | 10    |
|                          |     | (b) Indicate number of participants with missing data for each variable of interest                                                                                                                          | 9     |
| Outcome data             | 15* | Report numbers of outcome events or summary measures                                                                                                                                                         |       |
| Main results             | 16  | (a) Give unadjusted estimates and, if applicable, confounder-adjusted estimates and their precision (eg, 95% confidence interval). Make clear which confounders were adjusted for and why they were included | N/A   |
|                          |     | (b) Report category boundaries when continuous variables were categorized                                                                                                                                    | N/A   |
|                          |     | (c) If relevant, consider translating estimates of relative risk into absolute risk for a meaningful time period                                                                                             | N/A   |
| Other analyses           | 17  | Report other analyses done—eg analyses of subgroups and interactions, and sensitivity analyses                                                                                                               | 10    |
| <b>Discussion</b>        |     |                                                                                                                                                                                                              |       |
| Key results              | 18  | Summarise key results with reference to study objectives                                                                                                                                                     | 12-14 |
| Limitations              | 19  | Discuss limitations of the study, taking into account sources of potential bias or imprecision. Discuss both direction and magnitude of any potential bias                                                   | 15-16 |
| Interpretation           | 20  | Give a cautious overall interpretation of results considering objectives, limitations, multiplicity of analyses, results from similar studies, and other relevant evidence                                   | 13-16 |
| Generalisability         | 21  | Discuss the generalisability (external validity) of the study results                                                                                                                                        | 15    |
| <b>Other information</b> |     |                                                                                                                                                                                                              |       |
| Funding                  | 22  | Give the source of funding and the role of the funders for the present study and, if applicable, for the original study on which the present article is based                                                | 19    |

\*Give information separately for cases and controls in case-control studies and, if applicable, for exposed and unexposed groups in cohort and cross-sectional studies.

**Note:** An Explanation and Elaboration article discusses each checklist item and gives methodological background and published examples of transparent reporting. The STROBE checklist is best used in conjunction with this article (freely available on the Web sites of PLoS Medicine at <http://www.plosmedicine.org/>, Annals of Internal Medicine at <http://www.annals.org/>, and Epidemiology at <http://www.epidem.com/>). Information on the STROBE Initiative is available at [www.strobe-statement.org](http://www.strobe-statement.org).
