# Supplementary material for: Estimation of total cardiovascular risk using the 2019 WHO CVD prediction charts and comparison of population-level costs based on alternative drug therapy guidelines: a population-based study of adults in Bangladesh
Source: PubMed Central journal article supplement (PMC7371224; doi:10.1136/bmjopen-2019-035842), 2020-07-19
Supplement: bmjopen-2019-035842supp001.pdf [file bmjopen-2019-035842supp001.pdf]

**Appendix Table 1: Cost of common drugs used to treat cardiovascular disease in Bangladesh (converted to US\$)**

| <b>Drug Name</b>          | <b>Dose</b> | <b>Number of Tablets</b> | <b>Category</b>                                             | <b>Median price (in Bangladeshi Taka)</b> | <b>Price (in US\$)*</b> |
|---------------------------|-------------|--------------------------|-------------------------------------------------------------|-------------------------------------------|-------------------------|
| Aspirin                   | 100 mg      | 100 tablets              | Antiplatelet drugs                                          | 38BDT                                     | 0.45                    |
| Atenolol                  | 50 mg       | 100 tablets              | Antihypertensive, Beta-adrenoreceptor blocking drugs        | 77BDT                                     | 0.92                    |
| Captopril                 | 25 mg       | 100 tablets              | Antihypertensive, ACE inhibitors                            | 300 BDT                                   | 3.58                    |
| Chlorthalidone            | 25 mg       | 30 tablets               | Antihypertensive, thiazide diuretics                        | 60 BDT                                    | 0.72                    |
| Enalapril                 | 10 mg       | 100 tablets              | Antihypertensive, ACE inhibitors                            | 200 BDT                                   | 2.38                    |
| Frusemide                 | 40 mg       | 100 tablets              | Antihypertensive, loop diuretics                            | 53 BDT                                    | 0.63                    |
| Hydrochlorothiazide       | 25 mg       | 100 tablets              | Antihypertensive, thiazide diuretics                        | 70 BDT                                    | 0.83                    |
| Isosorbide dinitrate      | 10 mg       | 100 tablets              | Angina treatment, nitrates - coronary vasodilators          | 35 BDT                                    | 0.42                    |
| Labetalol                 | 100 mg      | 60 tablets               | Antihypertensive, Beta-adrenoreceptor blocking drugs        | 361.2 BDT                                 | 4.31                    |
| Losartan                  | 50 mg       | 100 tablets              | Antihypertensive, Angiotensin-II receptor blocker           | 600 BDT                                   | 7.15                    |
| Lovastatine               | 20 mg       | 30 tablets               | Lipid regulation, statin                                    | 303.3 BDT                                 | 3.62                    |
| Methyldopa                | 250 mg      | 100 tables               | Antihypertensive, Centrally acting or central sympatholytic | 308 BDT                                   | 3.67                    |
| Nifedipine (slow release) | 20 mg       | 100 tablets              | Angina treatment, calcium-channel blocker                   | 64 BDT                                    | 0.76                    |
| Propranolol hydrochloride | 10 mg       | 100 tablets              | Antihypertensive, Beta-adrenoreceptor blocking drugs        | 24 BDT                                    | 0.29                    |
| Simvastatine              | 10 mg       | 30 tablets               | Lipid regulation, statin                                    | 360 BDT                                   | 4.29                    |

|               |                      |             |                                                                               |          |       |
|---------------|----------------------|-------------|-------------------------------------------------------------------------------|----------|-------|
| Spirolactone  | 25 mg<br>1.5 million | 100 tablets | Antihypertensive, potassium-<br>sparing diuretics &<br>aldosterone antagonist | 202 BDT  | 2.41  |
| Streptokinase | unit/vial            | One vial    | Anticoagulant                                                                 | 3100 BDT | 36.96 |
| Warfarin      | 5 mg                 | 100 tablets | Anticoagulant                                                                 | 300 BDT  | 3.58  |

Abbreviations: mg, milligrams; US, United States; BDT, Bangladeshi Taka

\*Price conversion based on exchange rate on 02/07/2019
